# Supplementary material for: Palladium-catalyzed tandem reaction of epoxynitriles with arylboronic acids in aqueous medium: divergent synthesis of furans and pyrroles
Source: Royal Society of Chemistry journal article supplement (doi:10.1039/d0qo01016b), 2020-01-01
Supplement: d0qo01016b1.pdf [file d0qo01016b1.pdf]

## Electronic Supplementary Information (ESI)

### Palladium-catalyzed tandem reaction of epoxynitriles with arylboronic acids in aqueous medium: divergent synthesis of furans and pyrroles

Shuling Yu,<sup>†a</sup> Ling Dai,<sup>†a</sup> Yinlin Shao,<sup>a</sup> Renhao Li,<sup>b</sup> Zhongyan Chen,<sup>a</sup> Ningning Lv,<sup>a\*</sup> and Jiuxi Chen<sup>a\*</sup>

<sup>a</sup>College of Chemistry & Materials Engineering, Wenzhou University, Wenzhou 325035, P. R. China.

E-mail: [jiuxichen@wzu.edu.cn](mailto:jiuxichen@wzu.edu.cn); [ningninglv@wzu.edu.cn](mailto:ningninglv@wzu.edu.cn)

<sup>b</sup>School of Pharmaceutical Science, Wenzhou Medical University, Wenzhou 325035, P. R. China.

### Table of Contents

|                                          |     |
|------------------------------------------|-----|
| 1. General information.....              | S2  |
| 2. Experimental section.....             | S2  |
| 3. Control experiments.....              | S5  |
| 4. Reference.....                        | S7  |
| 5. Analytical data for reactants.....    | S7  |
| 6. Analytical data for all products..... | S10 |
| 7. NMR spectra for reactants.....        | S22 |
| 8. NMR spectra for all products.....     | S32 |

## 1. General information.

$^1\text{H}$  NMR and  $^{13}\text{C}$  NMR spectra were measured on a 500 MHz Bruker spectrometer, using  $\text{DMSO-}d_6$  or  $\text{CDCl}_3$  as the solvent with tetramethylsilane (TMS) as the internal standard at room temperature. Chemical shifts are given  $\delta$  relative to tetramethylsilane, and the coupling constants  $J$  are given in hertz. High-resolution mass spectra (HRMS) were recorded on an electrospray ionization (ESI) quadrupole time-of-flight mass spectrometer. Substrates of epoxide were synthesized according to the related literature.<sup>1-2</sup> Unless otherwise noted, materials were obtained commercially and used without further purification. Flash column chromatography was performed over silica gel (300–400 mesh).

## 2. Experimental section.

### 2.1. General procedure for the synthesis of 2-(3-aryloxiran-2-yl)acetonitriles (1a-e).<sup>1-2</sup>

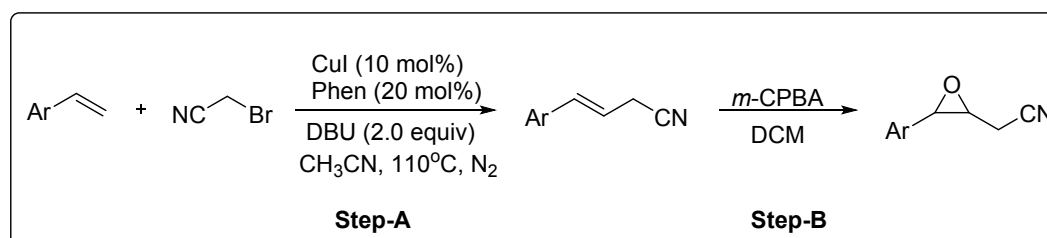

**Step-A<sup>1</sup>:** To a solution of the styrene (350  $\mu\text{L}$ , 3 mmol) in  $\text{CH}_3\text{CN}$  (10 ml) was added the 2-bromoacetonitrile (380  $\mu\text{L}$ , 6 mmol), 1,10-phenanthroline (108 mg, 0.6 mmol), CuI (57 mg, 0.3 mmol), and DBU (910  $\mu\text{L}$ , 6 mmol) under  $\text{N}_2$  in a round-bottomed flask. The reaction mixture was stirred at 110  $^\circ\text{C}$  for 5 h. After the reaction finished, the reaction mixture was cooled to room temperature and quenched by water. The mixture was extracted with EtOAc (3.0 mL $\times$ 3), the combined organic phases were dried over anhydrous  $\text{Na}_2\text{SO}_4$  and the solvent was evaporated under vacuum. The residue was purified by column chromatography (petroleum ether /ethyl acetate = 40:1) to give the corresponding (*E*)-4-arylbut-3-enitriles.

**Step-B<sup>2</sup>:** To a solution of *m*-CPBA (0.52 g, 3 mmol), in dichloromethane (2.0 mL) was added (*E*)-4-arylbut-3-enitriles (2 mmol) at 0  $^\circ\text{C}$ . After being stirred at r.t. for



### 2.3. Optimization of reaction conditions for the synthesis of pyrrole<sup>a</sup>

**Table S2.** Optimization of the reaction conditions for the synthesis of **4a**<sup>a</sup>

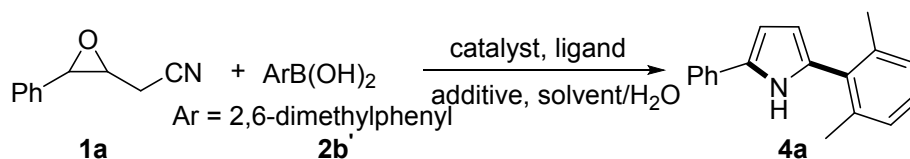

| Entry | Pd catalyst                                        | Ligand    | Additive              | Solvent                            | Yield (%) <sup>b</sup> |
|-------|----------------------------------------------------|-----------|-----------------------|------------------------------------|------------------------|
| 1     | Pd(OAc) <sub>2</sub>                               | <b>L1</b> | TsOH•H <sub>2</sub> O | MeOH/H <sub>2</sub> O              | 54                     |
| 2     | Pd(OAc) <sub>2</sub>                               | <b>L1</b> | TsOH•H <sub>2</sub> O | EtOH/H <sub>2</sub> O              | 65                     |
| 3     | Pd(OAc) <sub>2</sub>                               | <b>L1</b> | TsOH•H <sub>2</sub> O | <sup>n</sup> PrOH/H <sub>2</sub> O | 67                     |
| 4     | Pd(OAc) <sub>2</sub>                               | <b>L1</b> | TsOH•H <sub>2</sub> O | HFIP/H <sub>2</sub> O              | 33                     |
| 5     | Pd(OAc) <sub>2</sub>                               | <b>L1</b> | TsOH•H <sub>2</sub> O | <sup>i</sup> PrOH/H <sub>2</sub> O | 78                     |
| 6     | Pd(OAc) <sub>2</sub>                               | <b>L1</b> | MsOH                  | <sup>i</sup> PrOH/H <sub>2</sub> O | 67                     |
| 7     | Pd(OAc) <sub>2</sub>                               | <b>L1</b> | TfOH                  | <sup>i</sup> PrOH/H <sub>2</sub> O | 52                     |
| 8     | Pd(OAc) <sub>2</sub>                               | <b>L1</b> | TFA                   | <sup>i</sup> PrOH/H <sub>2</sub> O | 55                     |
| 9     | Pd(OAc) <sub>2</sub>                               | <b>L1</b> | AcOH                  | <sup>i</sup> PrOH/H <sub>2</sub> O | 49                     |
| 10    | Pd(OAc) <sub>2</sub>                               | <b>L1</b> | D-CSA                 | <sup>i</sup> PrOH/H <sub>2</sub> O | 65                     |
| 11    | Pd(TFA) <sub>2</sub>                               | <b>L1</b> | TsOH•H <sub>2</sub> O | <sup>i</sup> PrOH/H <sub>2</sub> O | 74                     |
| 12    | Pd(acac) <sub>2</sub>                              | <b>L1</b> | TsOH•H <sub>2</sub> O | <sup>i</sup> PrOH/H <sub>2</sub> O | 66                     |
| 13    | PdCl <sub>2</sub>                                  | <b>L1</b> | TsOH•H <sub>2</sub> O | <sup>i</sup> PrOH/H <sub>2</sub> O | 45                     |
| 14    | Pd(MeCN) <sub>2</sub> Cl <sub>2</sub>              | <b>L1</b> | TsOH•H <sub>2</sub> O | <sup>i</sup> PrOH/H <sub>2</sub> O | trace                  |
| 15    | Pd <sub>2</sub> (dba) <sub>3</sub>                 | <b>L1</b> | TsOH•H <sub>2</sub> O | <sup>i</sup> PrOH/H <sub>2</sub> O | 51                     |
| 16    | Pd(PhP <sub>3</sub> ) <sub>2</sub> Cl <sub>2</sub> | <b>L1</b> | TsOH•H <sub>2</sub> O | <sup>i</sup> PrOH/H <sub>2</sub> O | trace                  |
| 17    | ---                                                | <b>L1</b> | TsOH•H <sub>2</sub> O | <sup>i</sup> PrOH/H <sub>2</sub> O | 0                      |
| 18    | Pd(OAc) <sub>2</sub>                               | <b>L2</b> | TsOH•H <sub>2</sub> O | <sup>i</sup> PrOH/H <sub>2</sub> O | 59                     |
| 19    | Pd(OAc) <sub>2</sub>                               | <b>L3</b> | TsOH•H <sub>2</sub> O | <sup>i</sup> PrOH/H <sub>2</sub> O | 68                     |
| 20    | Pd(OAc) <sub>2</sub>                               | <b>L4</b> | TsOH•H <sub>2</sub> O | <sup>i</sup> PrOH/H <sub>2</sub> O | 35                     |
| 21    | Pd(OAc) <sub>2</sub>                               | <b>L5</b> | TsOH•H <sub>2</sub> O | <sup>i</sup> PrOH/H <sub>2</sub> O | 49                     |
| 22    | Pd(OAc) <sub>2</sub>                               | <b>L6</b> | TsOH•H <sub>2</sub> O | <sup>i</sup> PrOH/H <sub>2</sub> O | 15                     |
| 23    | Pd(OAc) <sub>2</sub>                               | ---       | TsOH•H <sub>2</sub> O | <sup>i</sup> PrOH/H <sub>2</sub> O | 0                      |
| 24    | Pd(OAc) <sub>2</sub>                               | <b>L1</b> | ---                   | <sup>i</sup> PrOH/H <sub>2</sub> O | 0                      |

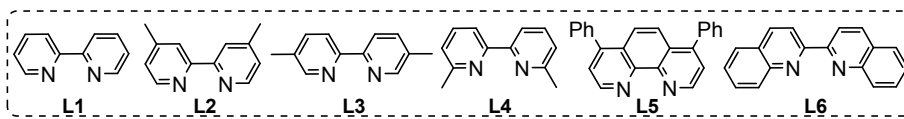

<sup>a</sup>Conditions: **1a** (0.3 mmol), **2a** (0.6 mmol), Pd catalyst (5 mol %), ligand (10 mol %), additive (2 equiv), solvent/H<sub>2</sub>O (0.5: 2.5 mL), 100 °C, 24 h, N<sub>2</sub>. <sup>b</sup>Isolated yield.

### 2.4. General procedure for the synthesis of furans.

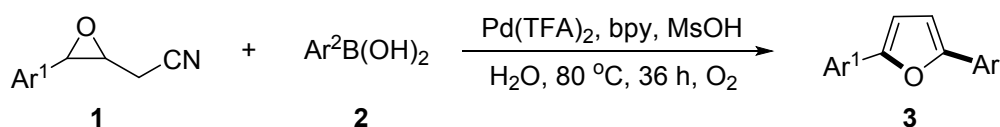

2-(3-aryloxiran-2-yl)acetonitriles **1** (0.3 mmol, 1.0 equiv), arylboronic acid **2** (0.6

mmol, 2.0 equiv), Pd(TFA)<sub>2</sub> (0.015 mmol, 5 mol%), 2,2'-bipyridyl (**L1**) (0.03 mmol, 10 mol%), MsOH (3 mmol, 10 equiv) and H<sub>2</sub>O (4.0 mL) were successively added into a Schlenk reaction tube under O<sub>2</sub> atmosphere. The reaction mixture was stirred vigorously at 80 °C in an oil bath for 36 h. After the reaction equilibrium, the mixture was poured into ethyl acetate, which was washed with saturated NaHCO<sub>3</sub> (2 × 10 mL) and then brine (10 mL). After the aqueous layer was extracted with ethyl acetate, the combined organic layers were dried over anhydrous Na<sub>2</sub>SO<sub>4</sub> and evaporated under a vacuum. The residue was purified by flash column chromatography with hexane to afford the desired furans **3**.

### 2.5. General procedure for the synthesis of pyrroles.

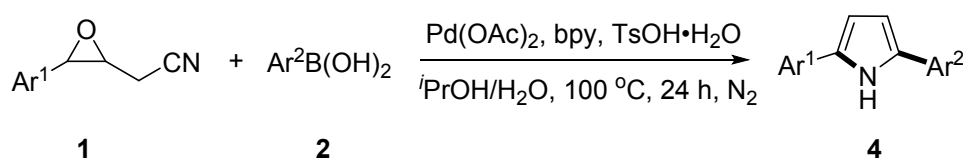

2-(3-aryloxiran-2-yl)acetonitriles **1** (0.3 mmol, 1.0 equiv.), arylboronic acid **2** (0.6 mmol, 2.0 equiv), Pd(OAc)<sub>2</sub> (0.015 mmol, 5 mol%) and 2,2'-bipyridyl (**L1**) (0.03 mmol, 10 mol%), TsOH·H<sub>2</sub>O (0.6 mmol, 2.0 equiv) and *i*PrOH/H<sub>2</sub>O (0.5 mL: 2.5 mL) were successively added into a Schlenk reaction tube under N<sub>2</sub> atmosphere. The reaction mixture was stirred vigorously at 100 °C in an oil bath for 24 h. After the reaction equilibrium, the mixture was poured into ethyl acetate, which was washed with saturated NaHCO<sub>3</sub> (2 × 10 mL) and then brine (10 mL). After the aqueous layer was extracted with ethyl acetate, the combined organic layers were dried over anhydrous Na<sub>2</sub>SO<sub>4</sub> and evaporated under a vacuum. The residue was purified by flash column chromatography with petroleum ether/ethyl acetate (16:1) to afford the desired products pyrroles **4**.

### 3. Control experiments.

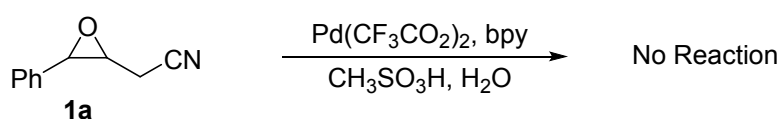

2-(3-phenyloxiran-2-yl)acetonitrile **1a** (0.3 mmol, 1.0 equiv), Pd(TFA)<sub>2</sub> (0.015 mmol,

5 mol%), 2,2'-bipyridyl (**L1**) (0.03 mmol, 10 mol%), MsOH (3 mmol, 10 equiv) and H<sub>2</sub>O (4 mL) were successively added into a Schlenk reaction tube under O<sub>2</sub> atmosphere. The reaction mixture was stirred vigorously at 80 °C in an oil bath for 36 h. After the reaction equilibrium, the solution was detected by TLC analysis, no target furan product was found.

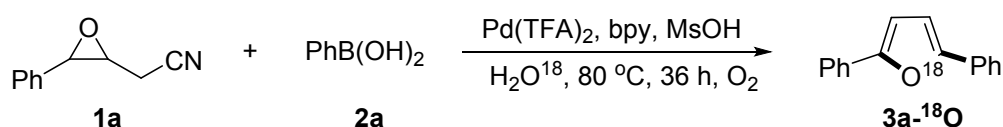

2-(3-phenyloxiran-2-yl)acetonitrile **1a** (0.3 mmol, 1.0 equiv), phenylboronic acid **2a** (0.6 mmol, 2.0 equiv), Pd(TFA)<sub>2</sub> (0.015 mmol, 5 mol%), 2,2'-bipyridyl (**L1**) (0.03 mmol, 10 mol%), MsOH (3 mmol, 10 equiv) and H<sub>2</sub>O<sup>18</sup> (20 equiv) were successively added into a Schlenk reaction tube under O<sub>2</sub> atmosphere. The reaction mixture was stirred vigorously at 80 °C in an oil bath for 36 h. After the reaction equilibrium, the mixture was poured into ethyl acetate, which was washed with saturated NaHCO<sub>3</sub> (2 × 10 mL) and then brine (10 mL). After the aqueous layer was extracted with ethyl acetate, the combined organic layers were dried over anhydrous Na<sub>2</sub>SO<sub>4</sub> and evaporated under a vacuum. The residue was purified by flash column chromatography with hexane to afford furans **3a-<sup>18</sup>O** in 75% yield.

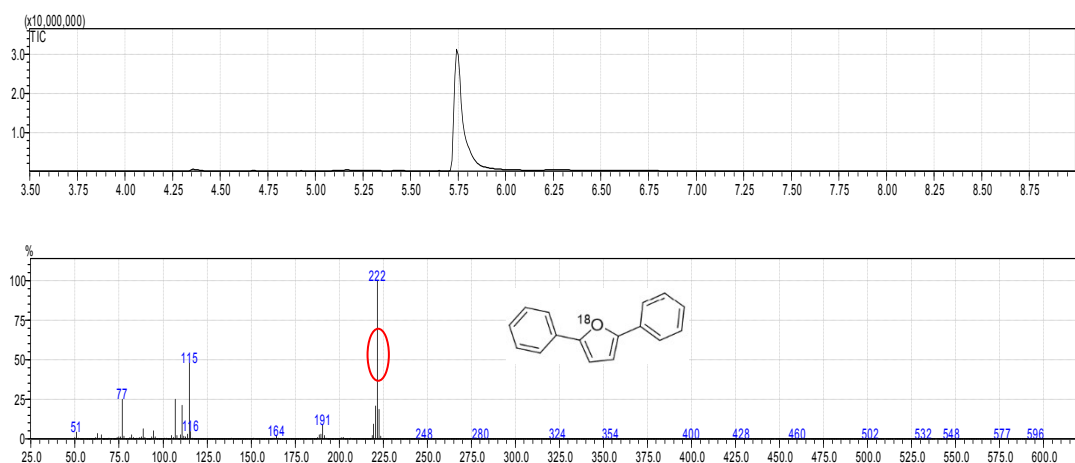

The <sup>18</sup>O-labeled Furan Product Determined by GC-MS Analysis.

#### 4. Reference.

- [1] W. Pu, D. Sun, W. Fan, W. Pan, Q. Chai, X. Wang and Y. Lv. Cu-Catalyzed atom transfer radical addition reactions of alkenes with  $\alpha$ -bromoacetonitrile. *Chem. Commun.*, 2019, **55**, 4821.
- [2] H. Hori, S. Arai and A. Nishida. Olefin–Migrative Cleavage of Cyclopropane Rings through the Nickel–Catalyzed Hydrocyanation of Allenes and Alkenes. *Adv. Synth. Catal.*, 2017, **359**, 1170.
- [3] S. Wen, W. Lv, D. Ba, J. Liu and G. Cheng. Ruthenium(II)-catalyzed chemoselective deacylative annulation of 1,3-diones with sulfoxonium ylides *via* C–C bond activation. *Chem. Sci.*, 2019, **10**, 9104.
- [4] M. Zhang, H. Jiang, H. Neumann, M. Beller and P. H. Dixneuf. Sequential Synthesis of Furans from Alkynes: Successive Ruthenium(II)-and Copper(II) - Catalyzed Processes. *Angew. Chem., Int. Ed.*, 2009, **48**, 1681.
- [5] S. Undeela, J. P. Ramchandra and R. S. Menon. A sequential synthesis of substituted furans from aryl alkynes and ketones involving a cerium(IV) ammonium nitrate (CAN)-mediated oxidative cyclization. *Tetrahedron Lett.*, 2014, **55**, 5667.
- [6] L. Chen, Y. Du, X. Zeng, T. Shi, F. Zhou and J. Zhou. Successively Recycle Waste as Catalyst: A One-Pot Wittig/1,4-Reduction/Paal–Knorr Sequence for Modular Synthesis of Substituted Furans. *Org. Lett.*, 2015, **17**, 1557.

#### 5. Analytical data for reactants.

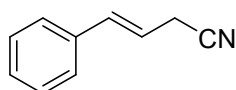

(*E*)-4-phenylbut-3-enenitrile (**1a'**): Colorless oil. Petroleum ether/ethyl acetate = 40/1 as eluent for column chromatography.  $^1\text{H NMR}$  (500 MHz,  $\text{DMSO-}d_6$ )  $\delta$  7.46 (d,  $J$  = 7.5 Hz, 2H), 7.35 (t,  $J$  = 7.5 Hz, 2H), 7.28 (t,  $J$  = 7.5 Hz, 1H), 6.67 (d,  $J$  = 16.0 Hz, 1H), 6.28–6.24 (m, 1H), 3.54 (d,  $J$  = 6.0 Hz, 2H);  $^{13}\text{C NMR}$  (125 MHz,  $\text{DMSO-}d_6$ )  $\delta$  135.8, 133.0, 128.7, 127.9, 126.3, 119.0, 118.5, 19.8. Spectroscopic data for the title compound were consistent with those reported in the literature.<sup>1</sup>

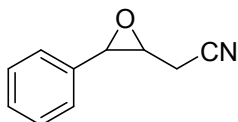

2-(3-phenyloxiran-2-yl)acetonitrile (**1a**): Colorless oil. Petroleum ether/ethyl acetate = 7/1 as eluent for column chromatography.  $^1\text{H NMR}$  (500 MHz,  $\text{DMSO-}d_6$ )  $\delta$  7.39-7.31 (m, 5H), 3.95 (s, 1H), 3.45 (d,  $J = 3.5$  Hz, 1H), 3.25-3.21 (m, 1H), 3.05-3.00 (m, 1H);  $^{13}\text{C NMR}$  (125 MHz,  $\text{DMSO-}d_6$ )  $\delta$  136.0, 128.5, 128.4, 126.0, 117.2, 57.0, 56.0, 20.2. **HRMS** calcd for  $\text{C}_{10}\text{H}_{10}\text{NO}^+$   $[\text{M}+\text{H}]^+$ : 160.0757, found: 160.0757.

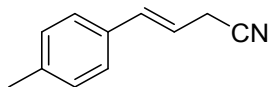

(*E*)-4-(*p*-tolyl)but-3-enenitrile (**1b'**): Colorless oil. Petroleum ether/ethyl acetate = 40/1 as eluent for column chromatography.  $^1\text{H NMR}$  (500 MHz,  $\text{CDCl}_3$ )  $\delta$  7.28 (d,  $J = 8.0$  Hz, 2H), 7.16 (d,  $J = 8.0$  Hz, 2H), 6.70 (d,  $J = 16.0$  Hz, 1H), 6.02-5.97 (m, 1H), 3.26-3.25 (m, 2H), 2.36 (s, 3H);  $^{13}\text{C NMR}$  (125 MHz,  $\text{CDCl}_3$ )  $\delta$  138.2, 134.5, 133.0, 129.4, 126.4, 117.5, 115.7, 21.2, 20.7. Spectroscopic data for the title compound were consistent with those reported in the literature.<sup>1</sup>

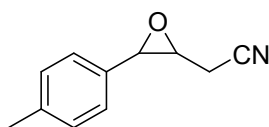

2-(3-(*p*-tolyl)oxiran-2-yl)acetonitrile (**1b**): Colorless oil. Petroleum ether/ethyl acetate = 7/1 as eluent for column chromatography.  $^1\text{H NMR}$  (500 MHz,  $\text{CDCl}_3$ )  $\delta$  7.19-7.15 (m, 4H), 3.85-3.84 (m, 1H), 3.25-3.22 (m, 1H), 2.90-2.78 (m, 2H), 2.36 (s, 3H).  $^{13}\text{C NMR}$  (125 MHz,  $\text{CDCl}_3$ )  $\delta$  138.7, 132.2, 129.3, 125.7, 115.7, 57.8, 56.0, 21.2, 20.9. **HRMS** calcd for  $\text{C}_{11}\text{H}_{12}\text{NO}^+$   $[\text{M}+\text{H}]^+$ : 174.0914, found: 174.0913.

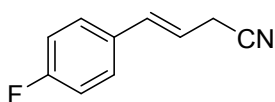

(*E*)-4-(4-fluorophenyl)but-3-enenitrile (**1c'**): Colorless oil. Petroleum ether/ethyl acetate = 40/1 as eluent for column chromatography.  $^1\text{H NMR}$  (500 MHz,  $\text{CDCl}_3$ )  $\delta$  7.33-7.30 (m, 2H), 7.01 (t,  $J = 8.5$  Hz, 2H), 6.67 (d,  $J = 16.0$  Hz, 1H), 5.98-5.93 (m, 1H), 3.26 (d,  $J = 5.5$  Hz, 2H);  $^{13}\text{C NMR}$  (125 MHz,  $\text{CDCl}_3$ )  $\delta$  163.7, 161.7, 133.4,



132.0, 131.9, 128.2, 128.1, 117.3, 116.7, 116.6, 115.8, 115.6, 20.7. Spectroscopic data for the title compound were consistent with those reported in the literature.<sup>1</sup>

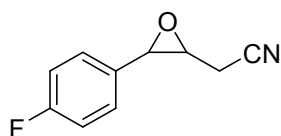

2-(3-(4-fluorophenyl)oxiran-2-yl)acetonitrile (**1c**): Colorless oil. Petroleum ether/ethyl acetate = 7/1 as eluent for column chromatography. <sup>1</sup>H NMR (500 MHz, CDCl<sub>3</sub>) δ 7.17-7.14 (m, 2H), 6.98-6.94 (m, 2H), 3.79 (s, 1H), 3.13-3.12 (m, 1H), 2.79-2.78 (m, 2H). <sup>13</sup>C NMR (125 MHz, CDCl<sub>3</sub>) δ 164.2, 162.2, 131.1 (2C), 127.6 (2C), 116.0, 115.8, 115.5, 57.4, 56.2, 21.1. HRMS calcd for C<sub>10</sub>H<sub>9</sub>FNO<sup>+</sup> [M+H]<sup>+</sup>: 178.0663, found: 178.0662.

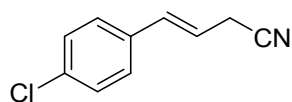

(*E*)-4-(4-chlorophenyl)but-3-enenitrile (**1d'**): Colorless oil. Petroleum ether/ethyl acetate = 40/1 as eluent for column chromatography. <sup>1</sup>H NMR (500 MHz, CDCl<sub>3</sub>) δ 7.23-7.19 (m, 4H), 6.61 (d, *J* = 16.0 Hz, 1H), 5.98-5.92 (m, 1H), 3.21-3.20 (m, 2H); <sup>13</sup>C NMR (125 MHz, CDCl<sub>3</sub>) δ 134.2, 134.0, 133.4, 128.9, 127.7, 117.6, 117.2, 20.8. Spectroscopic data for the title compound were consistent with those reported in the literature.<sup>1</sup>

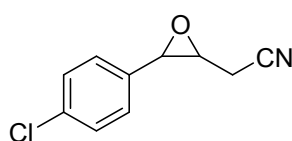

2-(3-(4-chlorophenyl)oxiran-2-yl)acetonitrile (**1d**): Colorless oil. Petroleum ether/ethyl acetate = 7/1 as eluent for column chromatography. <sup>1</sup>H NMR (500 MHz, CDCl<sub>3</sub>) δ 7.34 (d, *J* = 8.5 Hz, 2H), 7.20 (d, *J* = 8.0 Hz, 2H), 3.87 (s, 1H), 3.23-3.19 (m, 1H), 2.89-2.88 (m, 2H). <sup>13</sup>C NMR (125 MHz, CDCl<sub>3</sub>) δ 134.8, 133.8, 128.9, 127.1, 115.2, 57.2, 56.2, 21.0. HRMS calcd for C<sub>10</sub>H<sub>9</sub>ClNO<sup>+</sup> [M+H]<sup>+</sup>: 194.0367, found: 194.0364.

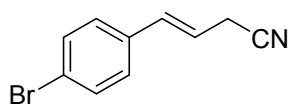

(*E*)-4-(4-bromophenyl)but-3-enenitrile (**1e'**): White solid. Petroleum ether/ethyl acetate = 40/1 as eluent for column chromatography.  $^1\text{H NMR}$  (500 MHz,  $\text{CDCl}_3$ )  $\delta$  7.46-7.44 (m, 2H), 7.23-7.22 (m, 2H), 6.67 (d,  $J = 16.0$  Hz, 1H), 6.07-6.02 (m, 1H), 3.28-3.27 (m, 2H);  $^{13}\text{C NMR}$  (125 MHz,  $\text{CDCl}_3$ )  $\delta$  134.7, 133.6, 132.0, 128.1, 122.3, 117.7, 117.1, 20.9. Spectroscopic data for the title compound were consistent with those reported in the literature.<sup>1</sup>

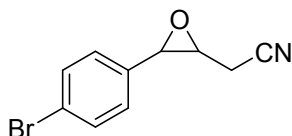

2-(3-(4-bromophenyl)oxiran-2-yl)acetonitrile (**1e**): Colorless oil. Petroleum ether/ethyl acetate = 7/1 as eluent for column chromatography.  $^1\text{H NMR}$  (500 MHz,  $\text{CDCl}_3$ )  $\delta$  7.49 (d,  $J = 8.5$  Hz, 2H), 7.14 (d,  $J = 8.5$  Hz, 2H), 3.86 (d,  $J = 1.5$  Hz, 1H), 3.22-3.20 (m, 1H), 2.89-2.88 (m, 2H).  $^{13}\text{C NMR}$  (125 MHz,  $\text{CDCl}_3$ )  $\delta$  134.4, 131.8, 127.4, 122.7, 115.4, 57.2, 56.1, 20.9. **HRMS** calcd for  $\text{C}_{10}\text{H}_9\text{BrNO}^+$   $[\text{M}+\text{H}]^+$ : 237.9862, found: 237.9864.

## 6. Analytical data for all products.

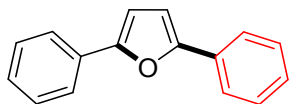

2,5-diphenylfuran (**3a**): White solid (56.8 mg, 86%), Hexane as eluent for column chromatography.  $^1\text{H NMR}$  (500 MHz,  $\text{DMSO}-d_6$ )  $\delta$  7.82 (d,  $J = 7.5$  Hz, 4H), 7.45 (t,  $J = 7.5$  Hz, 4H), 7.29 (t,  $J = 8.0$  Hz, 2H), 7.00 (s, 2H);  $^{13}\text{C NMR}$  (125 MHz,  $\text{DMSO}-d_6$ )  $\delta$  152.6, 130.1, 128.9, 127.5, 123.4, 108.1. Spectroscopic data for the title compound were consistent with those reported in the literature.<sup>3</sup>

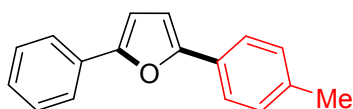

2-phenyl-5-(*p*-tolyl)furan (**3b**): Pale yellow solid (59.7 mg, 85%), Hexane as eluent for column chromatography.  $^1\text{H NMR}$  (500 MHz,  $\text{DMSO}-d_6$ )  $\delta$  7.81-7.79 (m, 2H), 7.71 (d,  $J = 8.0$  Hz, 2H), 7.44 (t,  $J = 8.0$  Hz, 2H), 7.30 (t,  $J = 7.5$  Hz, 1H), 7.26 (d,  $J = 7.5$  Hz, 2H), 7.06-7.05 (m, 1H), 7.00-6.99 (m, 1H), 2.33 (s, 3H);  $^{13}\text{C NMR}$  (125 MHz,

DMSO- $d_6$ )  $\delta$  152.8, 152.2, 137.0, 130.2, 129.4, 128.9, 127.5, 127.4, 123.4, 123.3, 108.1, 107.4, 20.8. Spectroscopic data for the title compound were consistent with those reported in the literature.<sup>3</sup>

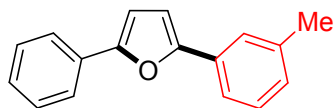

2-phenyl-5-(*m*-tolyl)furan (**3c**): Pale yellow solid (59.0 mg, 84%), Hexane as eluent for column chromatography.  $^1\text{H NMR}$  (500 MHz, DMSO- $d_6$ )  $\delta$  7.82 (d,  $J = 7.5$  Hz, 2H), 7.65 (s, 1H), 7.61 (d,  $J = 8.0$  Hz, 1H), 7.45 (t,  $J = 7.5$  Hz, 2H), 7.35-7.29 (m, 2H), 7.12 (d,  $J = 7.5$  Hz, 1H), 7.07 (d,  $J = 3.5$  Hz, 1H), 7.05 (d,  $J = 3.5$  Hz, 1H), 2.37 (s, 3H);  $^{13}\text{C NMR}$  (125 MHz, DMSO- $d_6$ )  $\delta$  152.8, 152.5, 138.1, 130.1, 130.0, 128.9, 128.8, 128.3, 127.5, 123.9, 123.4, 120.7, 108.1, 108.0, 21.0. Spectroscopic data for the title compound were consistent with those reported in the literature.<sup>3</sup>

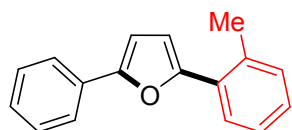

2-phenyl-5-(*o*-tolyl)furan (**3d**): Yellow oil (56.9 mg, 81%), Hexane as eluent for column chromatography.  $^1\text{H NMR}$  (500 MHz, DMSO- $d_6$ )  $\delta$  7.81-7.79 (m, 3H), 7.45 (t,  $J = 7.5$  Hz, 2H), 7.32-7.29 (m, 3H), 7.25-7.22 (m, 1H), 7.08 (d,  $J = 3.5$  Hz, 1H), 6.86 (d,  $J = 3.5$  Hz, 1H), 2.52 (s, 3H);  $^{13}\text{C NMR}$  (125 MHz, DMSO- $d_6$ )  $\delta$  152.4, 152.3, 133.8, 131.3, 130.1, 129.3, 128.9, 127.6, 127.5, 126.4, 126.2, 123.4, 111.2, 107.8, 21.7. Spectroscopic data for the title compound were consistent with those reported in the literature.<sup>3</sup>

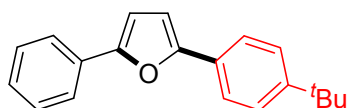

2-(4-(*tert*-butyl)phenyl)-5-phenylfuran (**3e**): White solid (53.9 mg, 65%), Hexane as eluent for column chromatography.  $^1\text{H NMR}$  (500 MHz, DMSO- $d_6$ )  $\delta$  7.80 (d,  $J = 7.0$  Hz, 2H), 7.73 (d,  $J = 8.5$  Hz, 2H), 7.47-7.44 (m, 4H), 7.30 (t,  $J = 7.5$  Hz, 1H), 7.06 (d,  $J = 3.0$  Hz, 1H), 7.00 (d,  $J = 3.0$  Hz, 1H), 1.30 (s, 9H);  $^{13}\text{C NMR}$  (125 MHz, DMSO- $d_6$ )  $\delta$  152.8, 152.3, 150.2, 130.2, 129.0, 127.5, 127.4, 125.6, 123.4, 123.3, 108.1, 107.5, 34.4, 31.0. Spectroscopic data for the title compound were consistent with

those reported in the literature.<sup>3</sup>

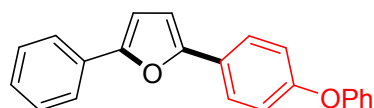

2-(4-phenoxyphenyl)-5-phenylfuran (**3f**): Yellowish solid (82.5 mg, 88%), Hexane as eluent for column chromatography. <sup>1</sup>H NMR (500 MHz, DMSO-*d*<sub>6</sub>) δ 7.84-7.79 (m, 4H), 7.46-7.39 (m, 4H), 7.30 (t, *J* = 7.5 Hz, 1H), 7.17 (t, *J* = 8.0 Hz, 1H), 7.08-7.02 (m, 5H), 6.98 (d, *J* = 3.5 Hz, 1H); <sup>13</sup>C NMR (125 MHz, DMSO-*d*<sub>6</sub>) δ 156.4, 156.1, 152.4, 152.3, 130.1, 130.0, 128.8, 127.3, 124.6, 124.3, 123.5, 123.0, 118.0, 117.7, 108.2, 107.5. Spectroscopic data for the title compound were consistent with those reported in the literature.<sup>3</sup>

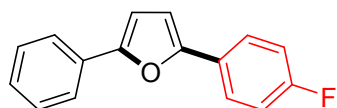

2-(4-fluorophenyl)-5-phenylfuran (**3g**): White solid (56.5 mg, 79%), Hexane as eluent for column chromatography. <sup>1</sup>H NMR (500 MHz, DMSO-*d*<sub>6</sub>) δ 7.88-7.85 (m, 2H), 7.81 (d, *J* = 7.5 Hz, 2H), 7.41 (t, *J* = 8.0 Hz, 2H), 7.29-7.18 (m, 3H), 7.01-6.98 (m, 2H); <sup>13</sup>C NMR (125 MHz, DMSO-*d*<sub>6</sub>) δ 162.5, 160.6, 152.6, 151.8, 130.0, 128.9, 127.1, 126.1, 124.8, 124.1, 123.1, 116.0, 113.8, 108.1, 107.0. Spectroscopic data for the title compound were consistent with those reported in the literature.<sup>3</sup>

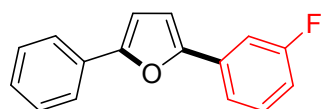

2-(3-fluorophenyl)-5-phenylfuran (**3h**): White solid (35.0 mg, 49%), Hexane as eluent for column chromatography. <sup>1</sup>H NMR (500 MHz, CDCl<sub>3</sub>) δ 7.74 (d, *J* = 8.0 Hz, 2H), 7.49 (d, *J* = 7.5 Hz, 1H), 7.42-7.39 (m, 3H), 7.39-7.34 (m, 1H), 7.30 (t, *J* = 7.5 Hz, 1H), 6.98-6.95 (m, 1H), 6.77-6.75 (m, 2H); <sup>13</sup>C NMR (125 MHz, CDCl<sub>3</sub>) δ 164.2, 162.3, 153.9, 152.1, 132.9, 132.8, 130.4, 130.1, 129.5, 128.8, 126.5, 123.4, 119.5, 119.3, 114.2, 114.1, 109.7, 109.2, 108.8, 107.1. Spectroscopic data for the title compound were consistent with those reported in the literature.<sup>3</sup>

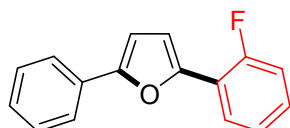

2-(2-fluorophenyl)-5-phenylfuran (**3i**): Yellow oil (32.9 mg, 46%), Hexane as eluent for column chromatography.  $^1\text{H NMR}$  (500 MHz,  $\text{CDCl}_3$ )  $\delta$  7.95-7.92 (m, 1H), 7.76-7.74 (m, 2H), 7.40 (t,  $J = 8.0$  Hz, 2H), 7.29-7.28 (m, 1H), 7.23-7.19 (m, 2H), 7.14-7.10 (m, 1H), 6.93 (t,  $J = 3.5$  Hz, 1H), 6.77 (d,  $J = 3.5$  Hz, 1H);  $^{13}\text{C NMR}$  (125 MHz,  $\text{CDCl}_3$ )  $\delta$  159.8, 157.8, 153.3, 147.6, 147.5, 130.6, 128.7, 128.2, 128.1, 126.5, 126.0, 124.6, 124.1, 123.5, 123.1, 119.1, 118.8, 116.0, 115.5, 113.5, 112.5, 106.6, 106.5. Spectroscopic data for the title compound were consistent with those reported in the literature.<sup>3</sup>

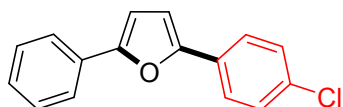

2-(4-chlorophenyl)-5-phenylfuran (**3j**): White solid (51.2 mg, 67%), Hexane as eluent for column chromatography.  $^1\text{H NMR}$  (500 MHz,  $\text{DMSO-}d_6$ )  $\delta$  7.81 (d,  $J = 8.0$  Hz, 2H), 7.76 (d,  $J = 8.5$  Hz, 2H), 7.62 (d,  $J = 7.0$  Hz, 2H), 7.33 (t,  $J = 7.5$  Hz, 2H), 7.21 (t,  $J = 8.0$  Hz, 1H), 7.13 (d,  $J = 3.0$  Hz, 1H), 7.08 (d,  $J = 3.0$  Hz, 1H);  $^{13}\text{C NMR}$  (125 MHz,  $\text{DMSO-}d_6$ )  $\delta$  153.0, 151.5, 131.8, 129.9, 129.3, 129.0, 127.7, 125.4, 123.5, 120.4, 109.0, 108.3. Spectroscopic data for the title compound were consistent with those reported in the literature.<sup>3</sup>

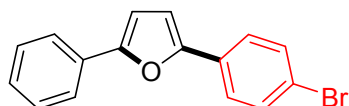

2-(4-bromophenyl)-5-phenylfuran (**3k**): White solid (47.6 mg, 53%), Hexane as eluent for column chromatography.  $^1\text{H NMR}$  (500 MHz,  $\text{DMSO-}d_6$ )  $\delta$  7.84-7.81 (m, 4H), 7.50 (d,  $J = 8.5$  Hz, 2H), 7.45 (t,  $J = 7.5$  Hz, 2H), 7.32 (t,  $J = 7.5$  Hz, 1H), 7.14 (d,  $J = 3.5$  Hz, 1H), 7.08 (d,  $J = 3.0$  Hz, 1H);  $^{13}\text{C NMR}$  (125 MHz,  $\text{DMSO-}d_6$ )  $\delta$  153.0, 151.5, 131.8, 129.9, 129.0, 128.9, 127.6, 125.0, 122.7, 107.3, 106.8. Spectroscopic data for the title compound were consistent with those reported in the literature.<sup>3</sup>

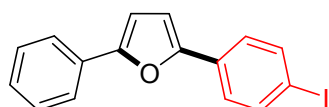

2-(4-iodophenyl)-5-phenylfuran (**3l**): White solid (50.9 mg, 49%), Hexane as eluent for column chromatography.  $^1\text{H NMR}$  (500 MHz,  $\text{DMSO-}d_6$ )  $\delta$  7.82-7.79 (m, 4H),

7.62 (d,  $J = 8.0$  Hz, 2H), 7.45 (t,  $J = 7.5$  Hz, 2H), 7.22 (t,  $J = 8.0$  Hz, 1H), 7.12 (d,  $J = 3.0$  Hz, 1H), 6.95 (d,  $J = 3.0$  Hz, 1H);  $^{13}\text{C}$  NMR (125 MHz, DMSO- $d_6$ )  $\delta$  153.0, 151.7, 137.6, 129.9, 129.6, 128.9, 127.6, 124.8, 123.8, 108.7, 108.2, 93.5. HRMS calcd for  $\text{C}_{16}\text{H}_{12}\text{IO}^+$   $[\text{M}+\text{H}]^+$ : 346.9928, found: 346.9925.

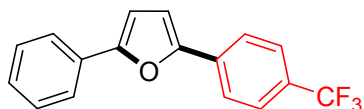

2-phenyl-5-(4-(trifluoromethyl)phenyl)furan (**3m**): Light yellow solid (31.1 mg, 36%), Hexane as eluent for column chromatography.  $^1\text{H}$  NMR (500 MHz,  $\text{CDCl}_3$ )  $\delta$  7.83 (d,  $J = 8.5$  Hz, 2H), 7.77-7.76 (m, 2H), 7.65 (d,  $J = 8.5$  Hz, 2H), 7.43 (t,  $J = 8.0$  Hz, 2H), 7.31 (t,  $J = 8.0$  Hz, 1H), 6.86 (d,  $J = 3.5$  Hz, 1H), 6.78 (d,  $J = 3.5$  Hz, 1H);  $^{13}\text{C}$  NMR (125 MHz,  $\text{CDCl}_3$ )  $\delta$  154.5, 151.8, 133.9, 130.4, 129.0, 128.8, 127.9, 125.8, 125.7, 125.3, 124.0, 123.6, 123.1, 109.3, 107.4. Spectroscopic data for the title compound were consistent with those reported in the literature.<sup>3</sup>

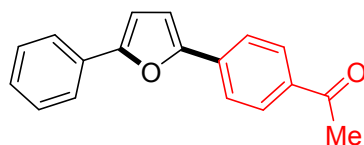

1-(4-(5-phenylfuran-2-yl)phenyl)ethan-1-one (**3n**): Pale yellow solid (32.3 mg, 41%), Hexane as eluent for column chromatography.  $^1\text{H}$  NMR (500 MHz, DMSO- $d_6$ )  $\delta$  8.02 (d,  $J = 8.5$  Hz, 2H), 7.95 (d,  $J = 8.5$  Hz, 2H), 7.86 (d,  $J = 7.5$  Hz, 2H), 7.47 (t,  $J = 7.5$  Hz, 2H), 7.35 (t,  $J = 7.5$  Hz, 1H), 7.31 (d,  $J = 3.5$  Hz, 1H), 7.16 (d,  $J = 3.5$  Hz, 1H), 7.26 (s, 3H);  $^{13}\text{C}$  NMR (125 MHz, DMSO- $d_6$ )  $\delta$  197.0, 153.8, 151.6, 135.3, 133.9, 130.0, 129.0, 128.9, 128.0, 123.7, 123.3, 110.9, 108.6, 26.6. HRMS calcd for  $\text{C}_{18}\text{H}_{15}\text{O}_2^+$   $[\text{M}+\text{H}]^+$ : 263.1067, found: 263.1067.

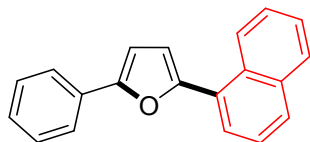

2-(naphthalen-1-yl)-5-phenylfuran (**3o**): Yellow oil (53.5 mg, 66%), Hexane as eluent for column chromatography.  $^1\text{H}$  NMR (500 MHz, DMSO- $d_6$ )  $\delta$  8.50 (d,  $J = 8.5$  Hz, 1H), 8.01 (d,  $J = 8.0$  Hz, 1H), 7.96 (d,  $J = 8.0$  Hz, 1H), 7.90 (d,  $J = 7.5$  Hz, 1H), 7.84 (d,  $J = 8.0$  Hz, 2H), 7.66-7.57 (m, 3H), 7.47 (t,  $J = 8.0$  Hz, 2H), 7.32 (t,  $J = 7.5$  Hz,

1H), 7.19 (d,  $J = 3.5$  Hz, 1H), 7.07 (d,  $J = 3.5$  Hz, 1H);  $^{13}\text{C}$  NMR (125 MHz, DMSO- $d_6$ )  $\delta$  153.1, 152.2, 133.7, 130.1, 129.3, 129.0, 128.7, 128.6, 127.6, 127.4, 127.1, 126.1, 125.8, 125.6, 124.9, 123.5, 112.0, 108.0. Spectroscopic data for the title compound were consistent with those reported in the literature.<sup>3</sup>

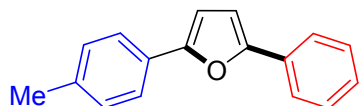

2-phenyl-5-(*p*-tolyl)furan (**3p**): Pale yellow solid (45.7 mg, 65%), Hexane as eluent for column chromatography.  $^1\text{H}$  NMR (500 MHz, DMSO- $d_6$ )  $\delta$  7.81-7.79 (m, 2H), 7.71 (d,  $J = 8.0$  Hz, 2H), 7.44 (t,  $J = 8.0$  Hz, 2H), 7.30 (t,  $J = 7.5$  Hz, 1H), 7.26 (d,  $J = 7.5$  Hz, 2H), 7.06-7.05 (m, 1H), 7.00-6.99 (m, 1H), 2.33 (s, 3H);  $^{13}\text{C}$  NMR (125 MHz, DMSO- $d_6$ )  $\delta$  152.8, 152.2, 137.0, 130.2, 129.4, 128.9, 127.5, 127.4, 123.4, 123.3, 108.1, 107.4, 20.8. Spectroscopic data for the title compound were consistent with those reported in the literature.<sup>3</sup>

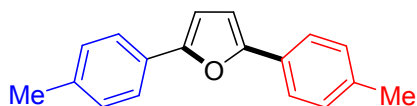

2,5-di-*p*-tolylfuran (**3q**): White solid (54.4 mg, 73%), Hexane as eluent for column chromatography.  $^1\text{H}$  NMR (500 MHz, DMSO- $d_6$ )  $\delta$  7.69 (d,  $J = 7.5$  Hz, 4H), 7.25 (d,  $J = 7.5$  Hz, 4H), 6.97 (s, 2H), 2.33 (s, 6H);  $^{13}\text{C}$  NMR (125 MHz, DMSO- $d_6$ )  $\delta$  152.4, 136.8, 129.4, 127.6, 123.3, 107.3, 20.8. Spectroscopic data for the title compound were consistent with those reported in the literature.<sup>4</sup>

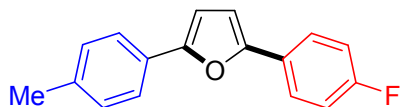

2-(4-fluorophenyl)-5-(*p*-tolyl)furan (**3r**): White solid (50.0 mg, 66%), Hexane as eluent for column chromatography.  $^1\text{H}$  NMR (500 MHz, DMSO- $d_6$ )  $\delta$  7.84 (t,  $J = 7.5$  Hz, 2H), 7.70 (d,  $J = 7.5$  Hz, 2H), 7.30-7.25 (m, 4H), 7.03 (d,  $J = 3.0$  Hz, 1H), 6.99 (d,  $J = 3.0$  Hz, 1H), 2.33 (s, 3H);  $^{13}\text{C}$  NMR (125 MHz, DMSO- $d_6$ )  $\delta$  152.9, 151.4, 137.0, 129.4, 127.4, 125.5, 125.4, 123.4, 116.0, 115.8, 107.9, 107.4, 20.8. Spectroscopic data for the title compound were consistent with those reported in the literature.<sup>5</sup>

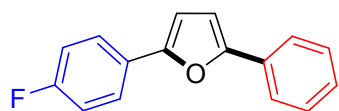

2-(4-fluorophenyl)-5-phenylfuran (**3s**): White solid (60.8 mg, 85%), Hexane as eluent for column chromatography.  $^1\text{H NMR}$  (500 MHz,  $\text{DMSO-}d_6$ )  $\delta$  7.88-7.85 (m, 2H), 7.81 (d,  $J = 7.5$  Hz, 2H), 7.45 (t,  $J = 7.5$  Hz, 2H), 7.33-7.28 (m, 3H), 7.08-7.06 (m, 2H);  $^{13}\text{C NMR}$  (125 MHz,  $\text{DMSO-}d_6$ )  $\delta$  162.5, 160.6, 152.6, 151.8, 130.0, 128.9, 127.5, 126.8, 125.6, 125.5, 123.4, 116.0, 115.8, 108.2, 108.0. Spectroscopic data for the title compound were consistent with those reported in the literature.<sup>3</sup>

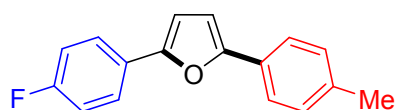

2-(4-fluorophenyl)-5-(*p*-tolyl)furan (**3t**): White solid (56.0 mg, 74%), Hexane as eluent for column chromatography.  $^1\text{H NMR}$  (500 MHz,  $\text{DMSO-}d_6$ )  $\delta$  7.84 (t,  $J = 7.5$  Hz, 2H), 7.70 (d,  $J = 7.5$  Hz, 2H), 7.30-7.25 (m, 4H), 7.03 (d,  $J = 3.0$  Hz, 1H), 6.99 (d,  $J = 3.0$  Hz, 1H), 2.33 (s, 3H);  $^{13}\text{C NMR}$  (125 MHz,  $\text{DMSO-}d_6$ )  $\delta$  152.9, 151.4, 137.0, 129.4, 127.4, 125.5, 125.4, 123.4, 116.0, 115.8, 107.9, 107.4, 20.8. Spectroscopic data for the title compound were consistent with those reported in the literature.<sup>5</sup>

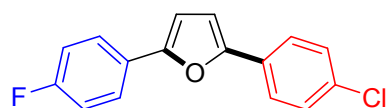

2-(4-chlorophenyl)-5-(4-fluorophenyl)furan (**3u**): White solid (61.4 mg, 75%), Hexane as eluent for column chromatography.  $^1\text{H NMR}$  (500 MHz,  $\text{DMSO-}d_6$ )  $\delta$  7.88-7.82 (m, 4H), 7.50 (d,  $J = 8.5$  Hz, 2H), 7.29 (t,  $J = 8.5$  Hz, 2H), 7.13 (d,  $J = 3.5$  Hz, 1H), 7.07 (d,  $J = 3.5$  Hz, 1H);  $^{13}\text{C NMR}$  (125 MHz,  $\text{DMSO-}d_6$ )  $\delta$  162.6, 160.6, 152.1, 151.5, 131.9, 128.9, 128.8, 126.6, 125.7, 125.6, 125.1, 116.0, 115.8, 109.0, 108.1. Spectroscopic data for the title compound were consistent with those reported in the literature.<sup>6</sup>

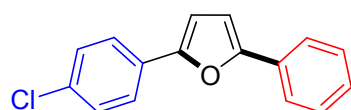

2-(4-chlorophenyl)-5-phenylfuran (**3v**): White solid (54.3 mg, 71%), Hexane as eluent for column chromatography.  $^1\text{H NMR}$  (500 MHz,  $\text{DMSO-}d_6$ )  $\delta$  7.81 (d,  $J = 8.0$  Hz, 2H), 7.76 (d,  $J = 8.5$  Hz, 2H), 7.63 (d,  $J = 8.5$  Hz, 2H), 7.45 (t,  $J = 8.0$  Hz, 2H), 7.32



(t,  $J = 7.5$  Hz, 1H), 7.13 (d,  $J = 3.0$  Hz, 1H), 7.08 (d,  $J = 3.0$  Hz, 1H);  $^{13}\text{C}$  NMR (125 MHz,  $\text{DMSO-}d_6$ )  $\delta$  153.0, 151.5, 131.8, 129.9, 129.3, 129.0, 127.7, 125.4, 123.5, 120.4, 109.0, 108.3. Spectroscopic data for the title compound were consistent with those reported in the literature.<sup>3</sup>

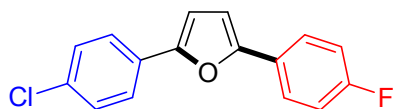

2-(4-chlorophenyl)-5-(4-fluorophenyl)furan (**3w**): White solid (61.4 mg, 75%), Hexane as eluent for column chromatography.  $^1\text{H}$  NMR (500 MHz,  $\text{DMSO-}d_6$ )  $\delta$  7.88-7.82 (m, 4H), 7.50 (d,  $J = 8.5$  Hz, 2H), 7.29 (t,  $J = 8.5$  Hz, 2H), 7.13 (d,  $J = 3.5$  Hz, 1H), 7.07 (d,  $J = 3.5$  Hz, 1H);  $^{13}\text{C}$  NMR (125 MHz,  $\text{DMSO-}d_6$ )  $\delta$  162.6, 160.6, 152.1, 151.5, 131.9, 128.9, 128.8, 126.6, 125.7, 125.6, 125.1, 116.0, 115.8, 109.0, 108.1. Spectroscopic data for the title compound were consistent with those reported in the literature.<sup>6</sup>

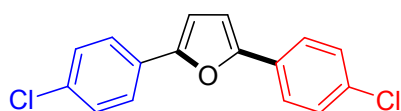

2,5-bis(4-chlorophenyl)furan (**3x**): White solid (59.0 mg, 68%), Hexane as eluent for column chromatography.  $^1\text{H}$  NMR (500 MHz,  $\text{DMSO-}d_6$ )  $\delta$  7.84 (d,  $J = 8.5$  Hz, 4H), 7.50 (d,  $J = 8.5$  Hz, 4H), 7.15 (s, 2H);  $^{13}\text{C}$  NMR (125 MHz,  $\text{DMSO-}d_6$ )  $\delta$  151.8, 132.0, 128.9, 128.8, 125.2, 109.0. Spectroscopic data for the title compound were consistent with those reported in the literature.<sup>6</sup>

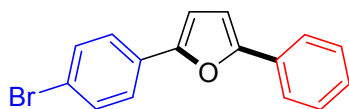

2-(4-bromophenyl)-5-phenylfuran (**3y**): White solid (35.9 mg, 40%), Hexane as eluent for column chromatography.  $^1\text{H}$  NMR (500 MHz,  $\text{DMSO-}d_6$ )  $\delta$  7.84-7.81 (m, 4H), 7.50 (d,  $J = 8.5$  Hz, 2H), 7.45 (t,  $J = 7.5$  Hz, 2H), 7.32 (t,  $J = 7.5$  Hz, 1H), 7.14 (d,  $J = 3.5$  Hz, 1H), 7.05 (d,  $J = 3.5$  Hz, 1H);  $^{13}\text{C}$  NMR (125 MHz,  $\text{CDCl}_3$ )  $\delta$  153.0, 151.5, 131.8, 129.9, 129.0, 128.9, 127.7, 125.1, 123.5, 108.9, 108.3. Spectroscopic data for the title compound were consistent with those reported in the literature.<sup>3</sup>

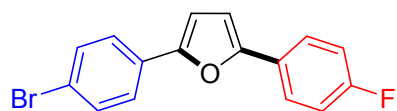

2-(4-bromophenyl)-5-(4-fluorophenyl)furan (**3z**): White solid (64.7 mg, 68%), Hexane as eluent for column chromatography.  $^1\text{H NMR}$  (500 MHz,  $\text{DMSO-}d_6$ )  $\delta$  7.87 (t,  $J = 7.5$  Hz, 2H), 7.77 (d,  $J = 8.0$  Hz, 2H), 7.63 (d,  $J = 7.5$  Hz, 2H), 7.22 (t,  $J = 9.0$  Hz, 2H), 7.09 (d,  $J = 2.5$  Hz, 1H), 7.01 (d,  $J = 2.5$  Hz, 1H);  $^{13}\text{C NMR}$  (125 MHz,  $\text{DMSO-}d_6$ )  $\delta$  162.6, 160.6, 152.2, 151.5, 131.8, 129.2, 126.6, 125.7, 125.6, 125.4, 120.4, 116.0, 115.8, 109.0, 108.1. **HRMS** calcd for  $\text{C}_{16}\text{H}_{11}\text{BrFO}^+$   $[\text{M}+\text{H}]^+$ : 316.9972, found: 316.9972.

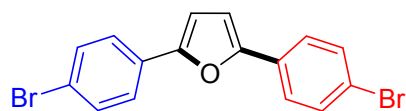

2,5-bis(4-bromophenyl)furan (**3aa**): White solid (53.3 mg, 47%), Hexane as eluent for column chromatography.  $^1\text{H NMR}$  (500 MHz,  $\text{DMSO-}d_6$ )  $\delta$  7.78 (d,  $J = 8.5$  Hz, 4H), 7.64 (d,  $J = 8.5$  Hz, 4H), 7.17 (s, 2H);  $^{13}\text{C NMR}$  (125 MHz,  $\text{DMSO-}d_6$ )  $\delta$  151.9, 131.9, 129.1, 125.5, 120.6, 109.2. Spectroscopic data for the title compound were consistent with those reported in the literature.<sup>4</sup>

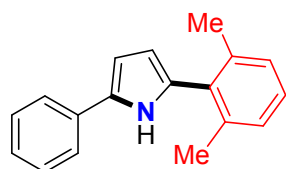

2-(2,6-dimethylphenyl)-5-phenyl-1H-pyrrole (**4a**): White solid (57.9 mg, 78%), Petroleum ether/ethyl acetate = 16/1 as eluent for column chromatography.  $^1\text{H NMR}$  (500 MHz,  $\text{DMSO-}d_6$ )  $\delta$  11.19 (s, 1H), 7.67 (d,  $J = 7.5$  Hz, 2H), 7.31 (t,  $J = 7.5$  Hz, 2H), 7.19-7.16 (m, 1H), 7.11 (t,  $J = 7.0$  Hz, 3H), 7.61-7.60 (m, 1H), 5.99-5.97 (m, 1H), 2.16 (s, 6H);  $^{13}\text{C NMR}$  (125 MHz,  $\text{DMSO-}d_6$ )  $\delta$  137.8, 133.8, 133.0, 130.8, 130.6, 128.6, 127.5, 127.1, 125.1, 123.1, 109.0, 106.0, 20.5. **HRMS** calcd for  $\text{C}_{18}\text{H}_{18}\text{N}^+$   $[\text{M}+\text{H}]^+$ : 248.1434, found: 248.1431.

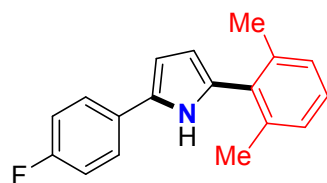

2-(2,6-dimethylphenyl)-5-(4-fluorophenyl)-1*H*-pyrrole (**4b**): White solid (66.9 mg, 84%), Petroleum ether/ethyl acetate = 16/1 as eluent for column chromatography. <sup>1</sup>H NMR (500 MHz, CDCl<sub>3</sub>) δ 8.26 (s, 1H), 7.52-7.49 (m, 2H), 7.31 (t, *J* = 8.0 Hz, 1H), 7.23 (d, *J* = 7.5 Hz, 2H), 7.16-7.11 (m, 2H), 6.65-6.64 (m, 1H), 6.24-6.22 (m, 1H), 2.34 (s, 6H); <sup>13</sup>C NMR (125 MHz, CDCl<sub>3</sub>) δ 162.4, 160.4, 138.7, 133.4, 131.0, 130.7, 129.5, 129.4, 128.2, 127.6, 125.2, 125.1, 116.0, 115.8, 110.3, 106.4, 20.8. HRMS calcd for C<sub>18</sub>H<sub>17</sub>FN<sup>+</sup> [M+H]<sup>+</sup>: 266.134, found: 266.1341.

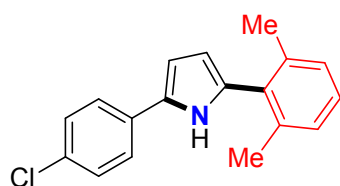

2-(4-chlorophenyl)-5-(2,6-dimethylphenyl)-1*H*-pyrrole (**4c**): White solid (68.5 mg, 81%), Petroleum ether/ethyl acetate = 16/1 as eluent for column chromatography. <sup>1</sup>H NMR (500 MHz, CDCl<sub>3</sub>) δ 8.18 (s, 1H), 7.33 (d, *J* = 8.5 Hz, 2H), 7.26 (d, *J* = 8.5 Hz, 2H), 7.18-7.15 (m, 1H), 7.08 (d, *J* = 7.5 Hz, 2H), 6.56-6.54 (m, 1H), 6.10-6.09 (m, 1H), 2.19 (s, 6H); <sup>13</sup>C NMR (125 MHz, CDCl<sub>3</sub>) δ 138.6, 133.2, 131.5, 131.4, 131.3, 130.4, 129.1, 128.2, 127.5, 124.6, 110.5, 107.0, 20.8. HRMS calcd for C<sub>18</sub>H<sub>17</sub>ClN<sup>+</sup> [M+H]<sup>+</sup>: 282.1044, found: 282.1042.

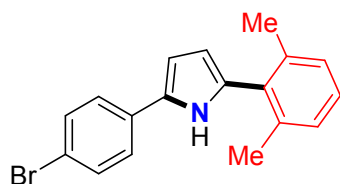

2-(4-bromophenyl)-5-(2,6-dimethylphenyl)-1*H*-pyrrole (**4d**): White solid (69.5 mg, 71%), Petroleum ether/ethyl acetate = 16/1 as eluent for column chromatography. <sup>1</sup>H NMR (500 MHz, CDCl<sub>3</sub>) δ 8.20 (s, 1H), 7.44 (d, *J* = 8.5 Hz, 2H), 7.30 (d, *J* = 8.5 Hz, 2H), 7.21-7.16 (m, 1H), 7.10 (d, *J* = 7.5 Hz, 2H), 6.58-6.57 (m, 1H), 6.11-6.10 (m, 1H), 2.20 (s, 6H); <sup>13</sup>C NMR (125 MHz, CDCl<sub>3</sub>) δ 138.6, 133.2, 132.0, 131.8, 131.4, 130.3, 128.2, 127.5, 124.9, 119.3, 110.4, 107.0, 20.8. HRMS calcd for C<sub>18</sub>H<sub>17</sub>BrN<sup>+</sup> [M+H]<sup>+</sup>: 326.0539, found: 326.0536.

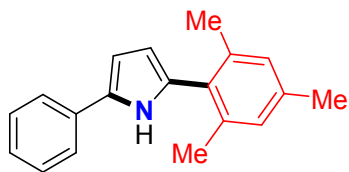

2-mesityl-5-phenyl-1*H*-pyrrole (**4e**): Yellow solid (51.8 mg, 66%), Petroleum ether/ethyl acetate = 16/1 as eluent for column chromatography. **<sup>1</sup>H NMR** (500 MHz, DMSO-*d*<sub>6</sub>) δ 11.12 (s, 1H), 7.66 (d, *J* = 7.5 Hz, 2H), 7.31 (t, *J* = 7.5 Hz, 2H), 7.11 (t, *J* = 7.0 Hz, 1H), 6.94 (s, 2H), 6.59 (s, 1H), 5.94 (s, 1H), 2.27 (s, 3H), 2.12 (s, 6H); **<sup>13</sup>C NMR** (125 MHz, DMSO-*d*<sub>6</sub>) δ 137.5, 136.5, 133.1, 130.9, 130.7, 130.6, 128.6, 127.7, 125.0, 123.1, 109.1, 105.9, 20.6, 20.4. **HRMS** calcd for C<sub>19</sub>H<sub>20</sub>N<sup>+</sup> [M+H]<sup>+</sup>: 262.1590, found: 262.1588.

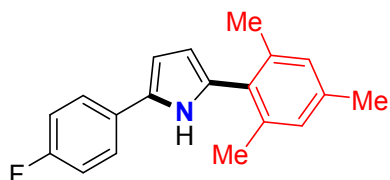

2-(4-fluorophenyl)-5-mesityl-1*H*-pyrrole (**4f**): White solid (46.9 mg, 56%), Petroleum ether/ethyl acetate = 16/1 as eluent for column chromatography. **<sup>1</sup>H NMR** (500 MHz, CDCl<sub>3</sub>) δ 8.22 (s, 1H), 7.50-7.47 (m, 2H), 7.14-7.10 (m, 2H), 7.05 (s, 2H), 6.62-6.61 (m, 1H), 6.20-6.19 (m, 1H), 2.43 (s, 3H), 2.29 (s, 6H); **<sup>13</sup>C NMR** (125 MHz, CDCl<sub>3</sub>) δ 162.3, 160.4, 138.5, 137.9, 131.0, 130.5, 130.4, 129.5, 129.4, 128.3, 125.1, 125.0, 116.0, 115.8, 110.4, 106.3, 21.2, 20.7. **HRMS** calcd for C<sub>19</sub>H<sub>19</sub>FN<sup>+</sup> [M+H]<sup>+</sup>: 280.1496, found: 280.1496.

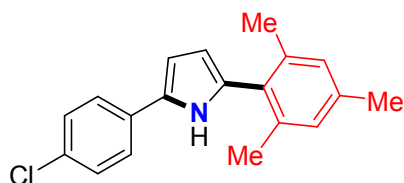

2-(4-chlorophenyl)-5-mesityl-1*H*-pyrrole (**4g**): Yellow solid (41.7 mg, 47%), Petroleum ether/ethyl acetate = 16/1 as eluent for column chromatography. **<sup>1</sup>H NMR** (500 MHz, CDCl<sub>3</sub>) δ 8.26 (s, 1H), 7.44 (d, *J* = 8.5 Hz, 2H), 7.38 (d, *J* = 8.5 Hz, 2H), 7.04 (s, 2H), 6.67-6.66 (m, 1H), 6.20-6.19 (m, 1H), 2.43 (s, 3H), 2.28 (m, 6H); **<sup>13</sup>C NMR** (125 MHz, CDCl<sub>3</sub>) δ 138.5, 138.0, 131.5, 131.4, 131.3, 130.3, 130.2, 129.1, 128.3, 124.6, 110.6, 107.0, 21.2, 20.7. **HRMS** calcd for C<sub>19</sub>H<sub>19</sub>ClN<sup>+</sup> [M+H]<sup>+</sup>:

296.1201, found: 296.1203.

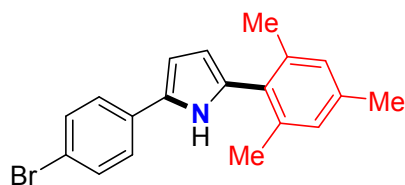

2-(4-bromophenyl)-5-mesityl-1*H*-pyrrole (**4h**): White solid (38.9 mg, 38%), Petroleum ether/ethyl acetate = 16/1 as eluent for column chromatography.  $^1\text{H NMR}$  (500 MHz,  $\text{CDCl}_3$ )  $\delta$  8.18 (s, 1H), 7.50 (d,  $J = 8.0$  Hz, 2H), 7.34 (d,  $J = 8.0$  Hz, 2H), 7.00 (s, 2H), 6.63 (d,  $J = 2.0$  Hz, 1H), 6.16 (d,  $J = 2.0$  Hz, 1H), 2.38 (s, 3H), 2.23 (s, 6H);  $^{13}\text{C NMR}$  (125 MHz,  $\text{CDCl}_3$ )  $\delta$  138.4, 138.0, 132.0, 131.9, 131.4, 130.2, 130.1, 128.3, 124.9, 119.2, 110.5, 107.0, 21.1, 20.7. **HRMS** calcd for  $\text{C}_{19}\text{H}_{19}\text{BrN}^+$   $[\text{M}+\text{H}]^+$ : 340.0696, found: 340.0693.

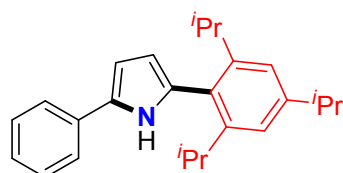

2-phenyl-5-(2,4,6-triisopropylphenyl)-1*H*-pyrrole (**4i**): Yellow solid (43.5 mg, 42%), Petroleum ether/ethyl acetate = 16/1 as eluent for column chromatography.  $^1\text{H NMR}$  (500 MHz,  $\text{CDCl}_3$ )  $\delta$  8.72 (s, 1H), 7.52 (d,  $J = 8.0$  Hz, 2H), 7.37 (t,  $J = 7.5$  Hz, 2H), 7.18 (t,  $J = 7.5$  Hz, 1H), 7.11 (s, 2H), 6.64-6.62 (m, 1H), 6.16-6.15 (m, 1H), 3.02-2.95 (m, 1H), 2.93-2.85 (m, 2H), 1.33 (d,  $J = 8.5$  Hz, 6H), 1.16 (s, 12H);  $^{13}\text{C NMR}$  (125 MHz,  $\text{CDCl}_3$ )  $\delta$  149.6, 149.4, 133.0, 131.0, 130.5, 128.9, 128.8, 125.7, 123.3, 120.6, 110.9, 106.1, 34.5, 30.7, 24.1. **HRMS** calcd for  $\text{C}_{25}\text{H}_{32}\text{N}^+$   $[\text{M}+\text{H}]^+$ : 346.2529, found: 346.2527.

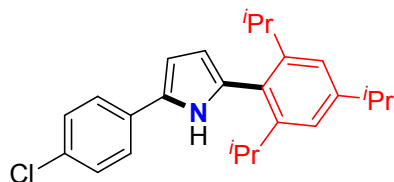

2-(4-chlorophenyl)-5-(2,4,6-triisopropylphenyl)-1*H*-pyrrole (**4j**): Yellow solid (44.4 mg, 39%), Petroleum ether/ethyl acetate = 16/1 as eluent for column chromatography.  $^1\text{H NMR}$  (500 MHz,  $\text{CDCl}_3$ )  $\delta$  8.23 (s, 1H), 7.39-7.36 (m, 2H), 7.31 (d,  $J = 8.5$  Hz, 2H), 7.10 (s, 2H), 6.61-6.60 (m, 1H), 6.17-6.16 (m, 1H), 3.00-2.94 (m, 1H), 2.87-2.82

(m, 2H), 1.33-1.31 (m, 6H), 1.18 (s, 12H);  $^{13}\text{C}$  NMR (125 MHz,  $\text{CDCl}_3$ )  $\delta$  149.6, 149.5, 131.5, 131.2, 131.0, 130.0, 129.0, 128.3, 128.2, 124.5, 120.7, 111.2, 106.7, 34.5, 30.7, 24.1. **HRMS** calcd for  $\text{C}_{25}\text{H}_{31}\text{ClN}^+$   $[\text{M}+\text{H}]^+$ : 380.2140, found: 380.2140.

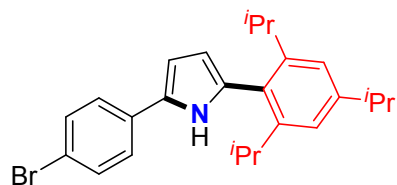

2-(4-bromophenyl)-5-(2,4,6-triisopropylphenyl)-1*H*-pyrrole (**4k**): Yellow solid (35.7 mg, 28%), Petroleum ether/ethyl acetate = 16/1 as eluent for column chromatography.  $^1\text{H}$  NMR (500 MHz,  $\text{CDCl}_3$ )  $\delta$  8.18 (s, 1H), 7.49 (d,  $J = 8.5$  Hz, 2H), 7.33 (d,  $J = 8.5$  Hz, 2H), 7.10 (s, 2H), 6.62-6.61 (m, 1H), 6.18-6.16 (m, 1H), 3.01-2.93 (m, 1H), 2.90-2.80 (m, 2H), 1.33 (d,  $J = 7.0$  Hz, 6H), 1.18 (d,  $J = 5.5$  Hz, 12H);  $^{13}\text{C}$  NMR (125 MHz,  $\text{CDCl}_3$ )  $\delta$  149.6, 149.5, 132.0, 131.9, 131.1, 129.9, 128.2, 124.8, 120.7, 119.2, 111.3, 106.8, 34.5, 30.7, 24.5, 24.0. **HRMS** calcd for  $\text{C}_{25}\text{H}_{31}\text{BrN}^+$   $[\text{M}+\text{H}]^+$ : 424.1635, found: 424.1636.

## 7. NMR spectra for reactants.

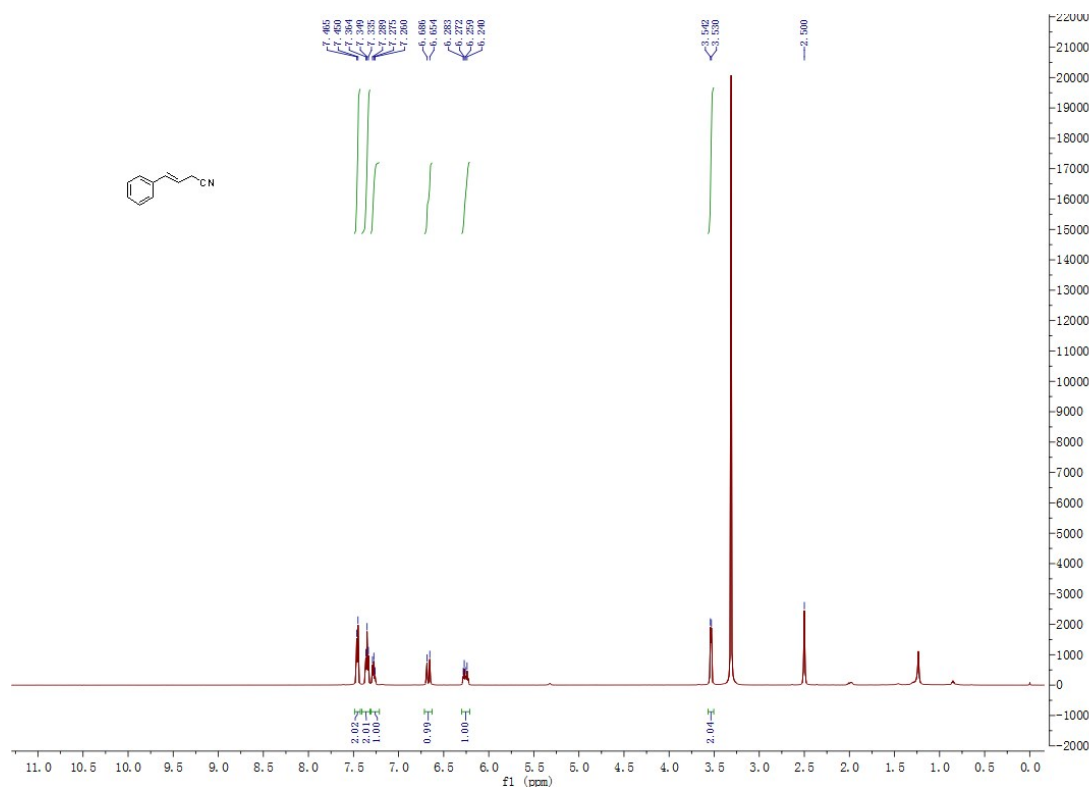

$^1\text{H}$  NMR (500 MHz,  $\text{DMSO}-d_6$ ) of compound **1a'**

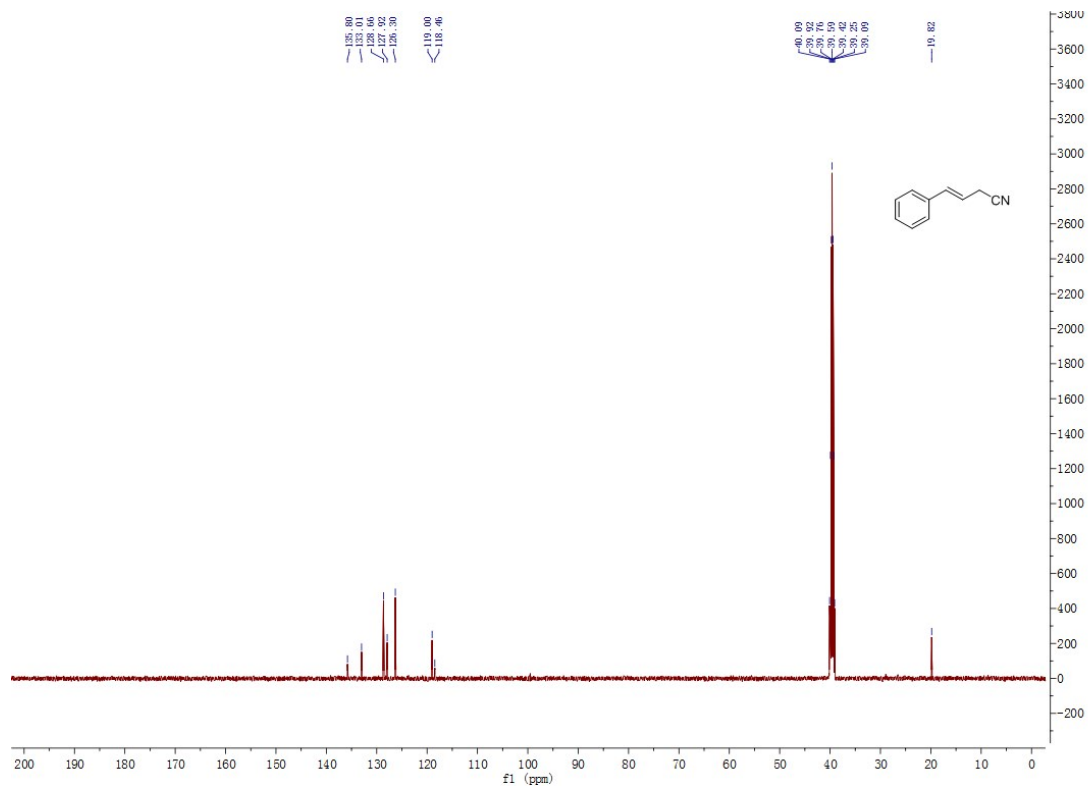

$^{13}\text{C}$  NMR (125 MHz,  $\text{DMSO-}d_6$ ) of compound **1a'**

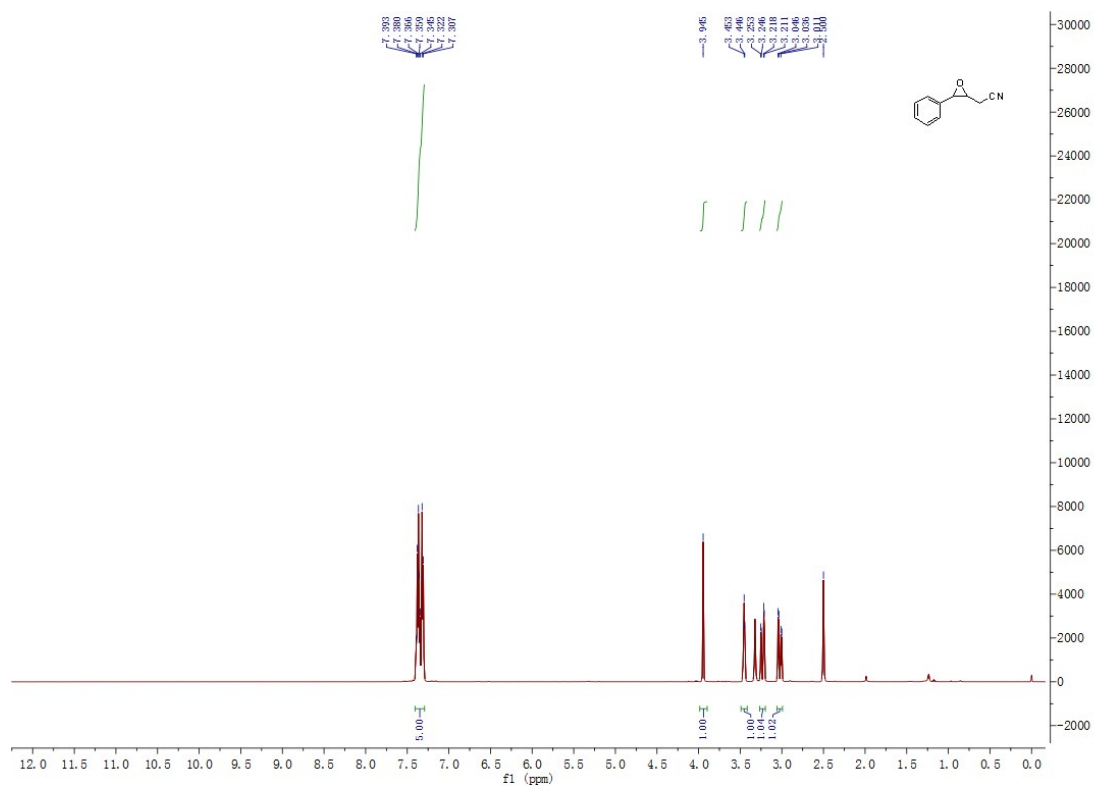

$^1\text{H}$  NMR (500 MHz,  $\text{DMSO-}d_6$ ) of compound **1a**

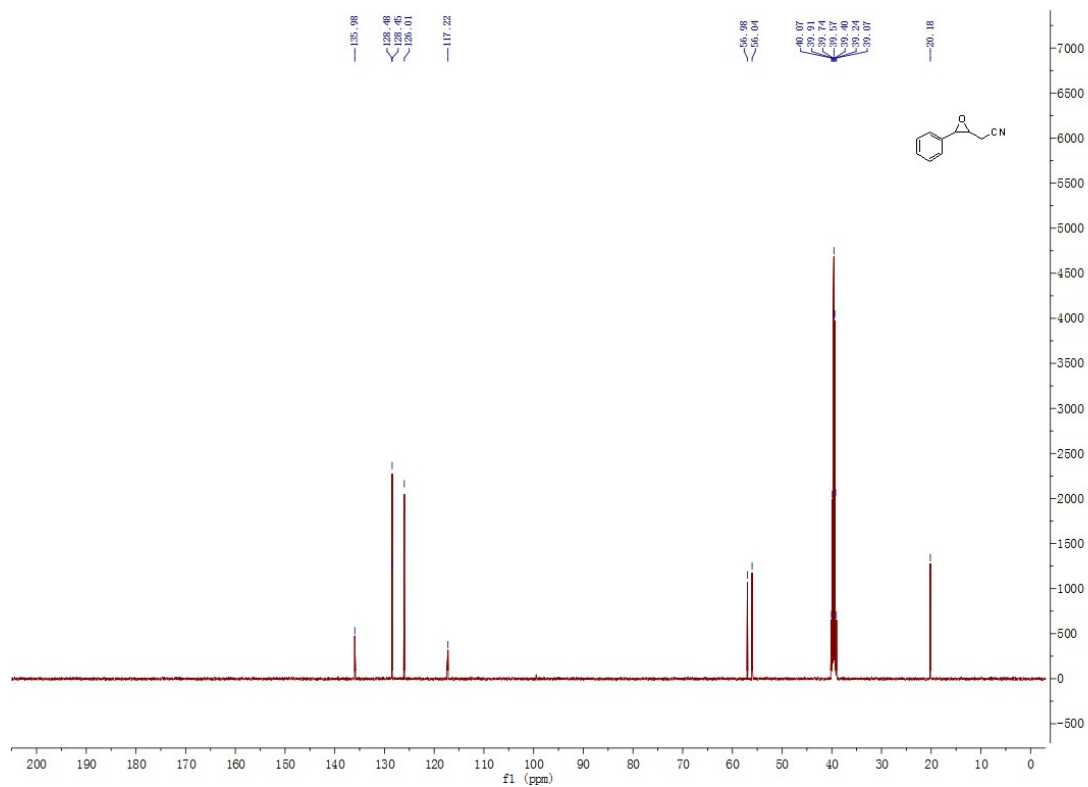

$^{13}\text{C}$  NMR (125 MHz,  $\text{DMSO-}d_6$ ) of compound **1a**

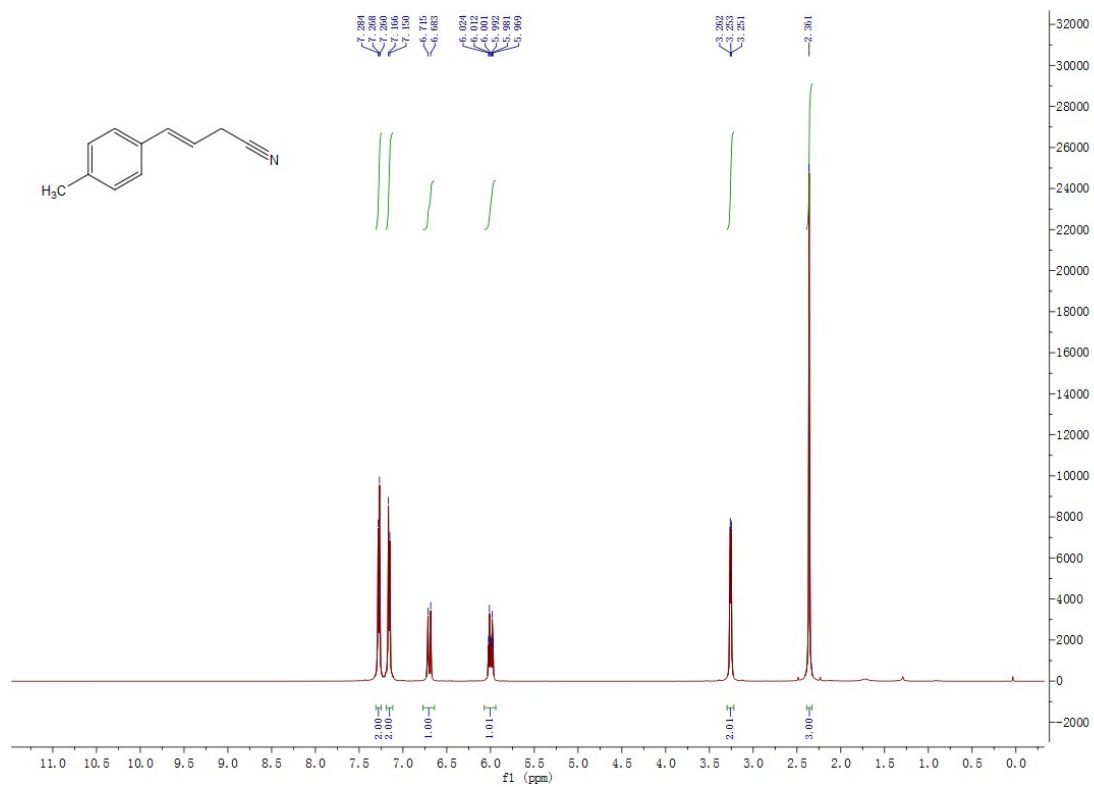

$^1\text{H}$  NMR (500 MHz,  $\text{CDCl}_3$ ) of compound **1b'**



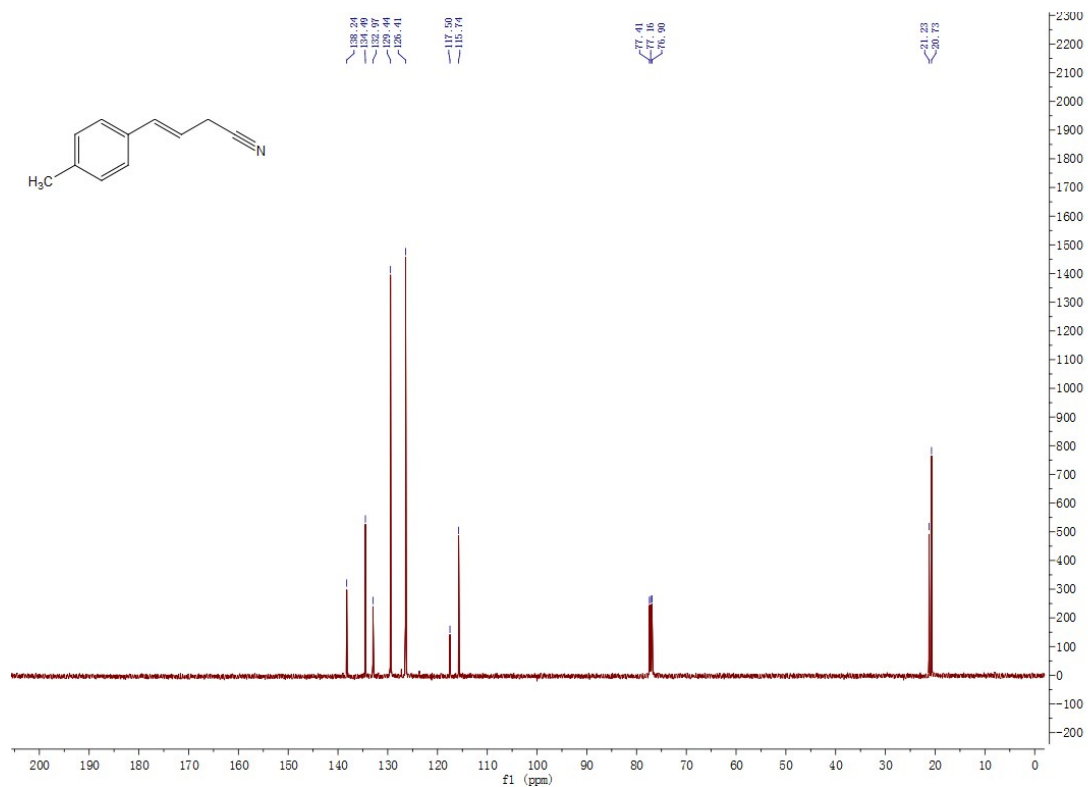

$^{13}\text{C}$  NMR (125 MHz,  $\text{CDCl}_3$ ) of compound **1b'**

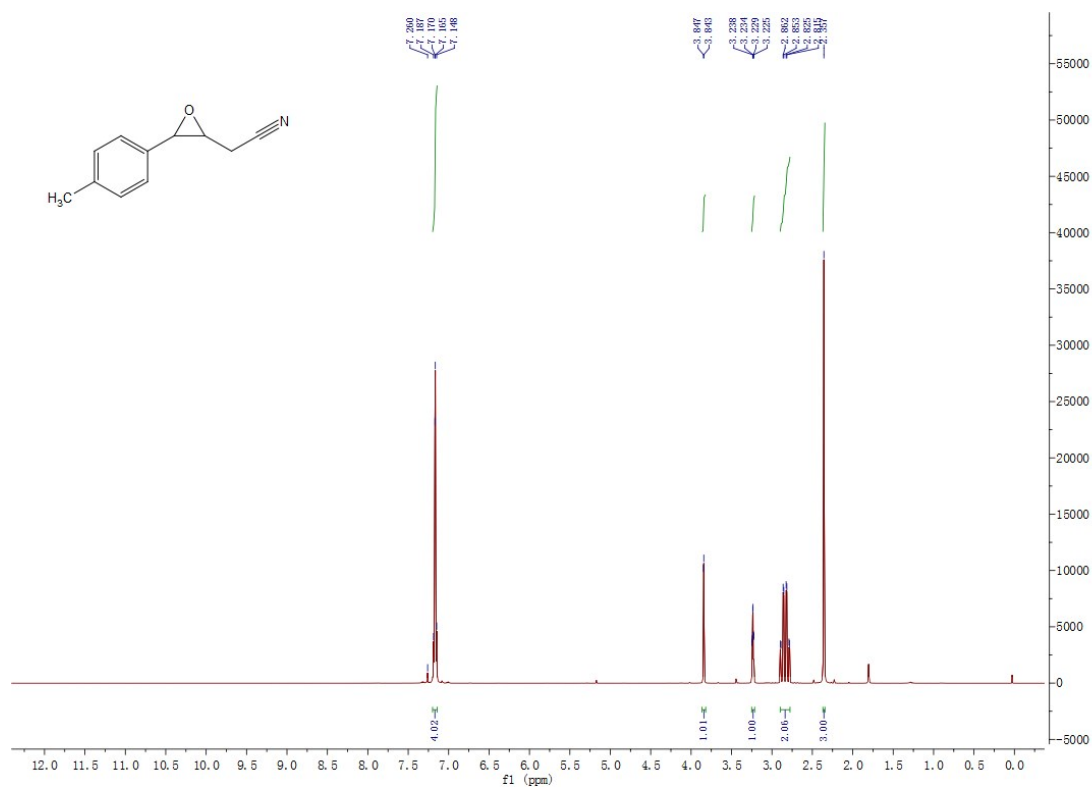

$^1\text{H}$  NMR (500 MHz,  $\text{CDCl}_3$ ) of compound **1b**

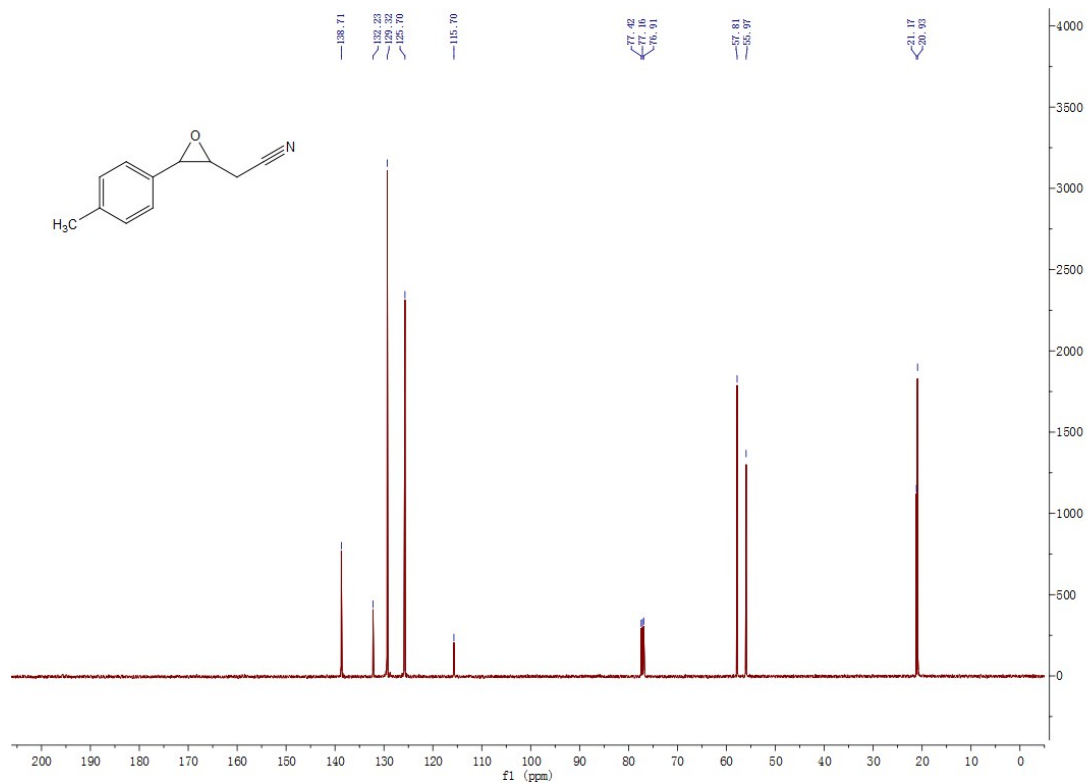

$^{13}\text{C}$  NMR (125 MHz,  $\text{CDCl}_3$ ) of compound **1b**

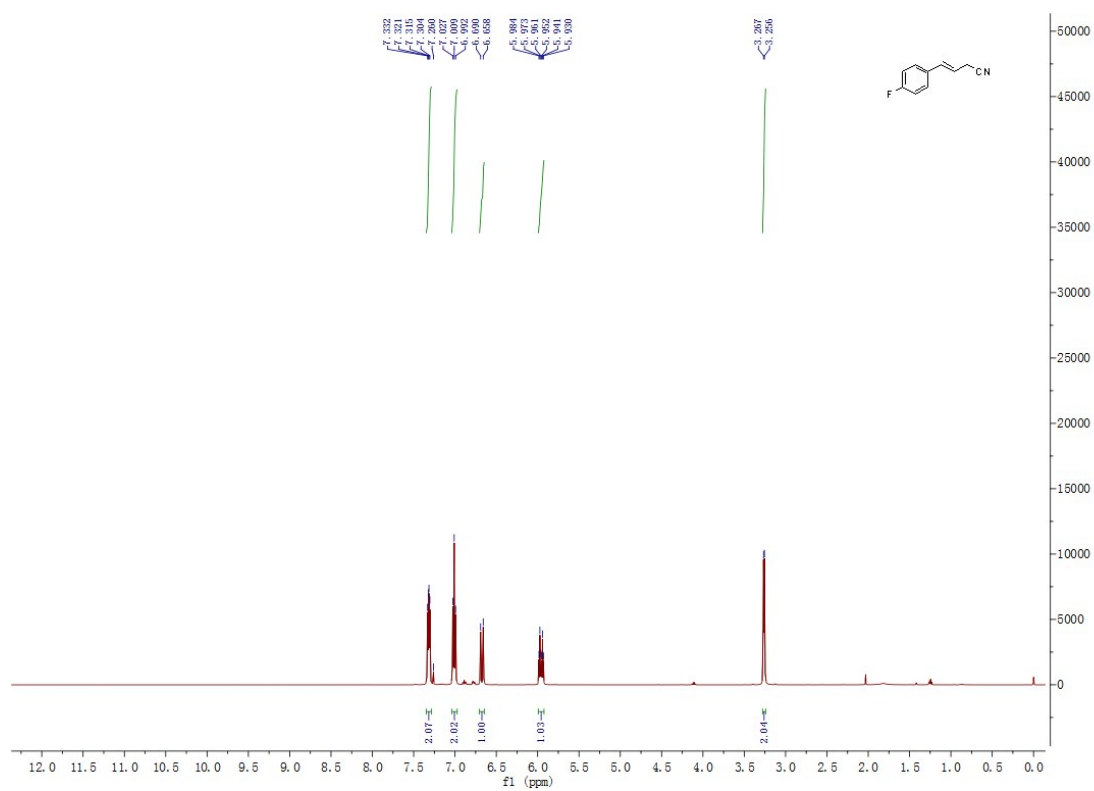

$^1\text{H}$  NMR (500 MHz,  $\text{CDCl}_3$ ) of compound **1c'**

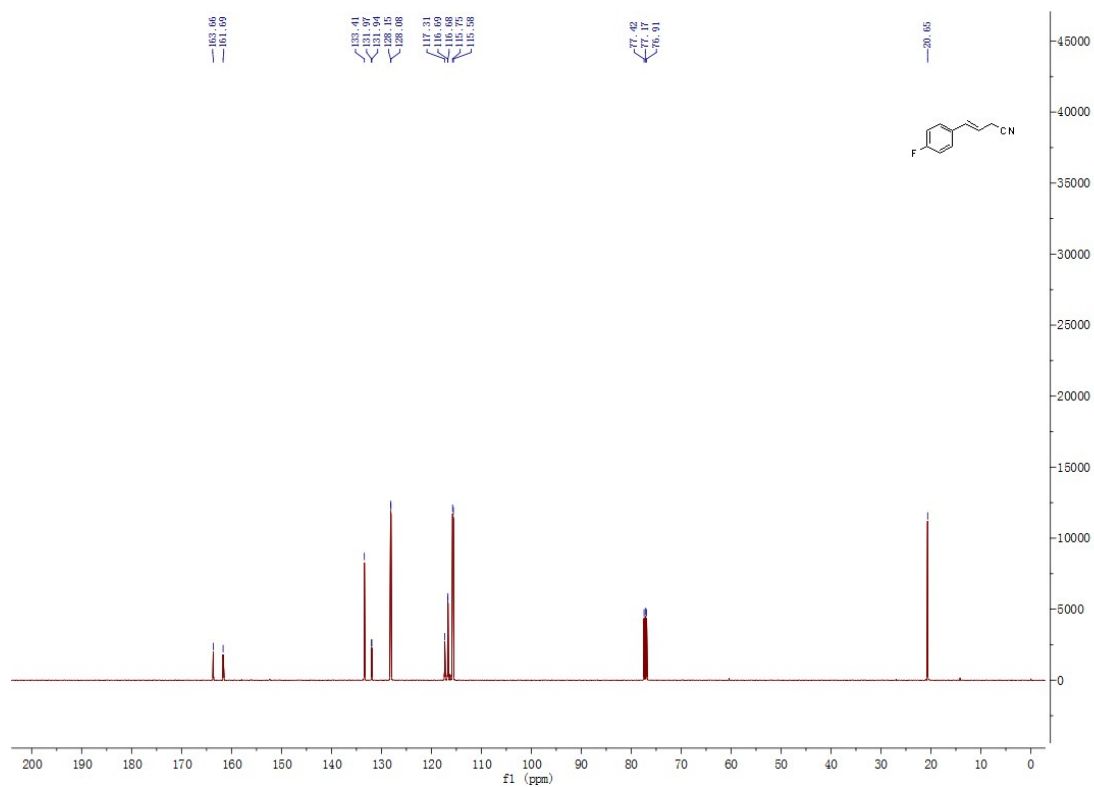

$^{13}\text{C}$  NMR (125 MHz,  $\text{CDCl}_3$ ) of compound **1c'**

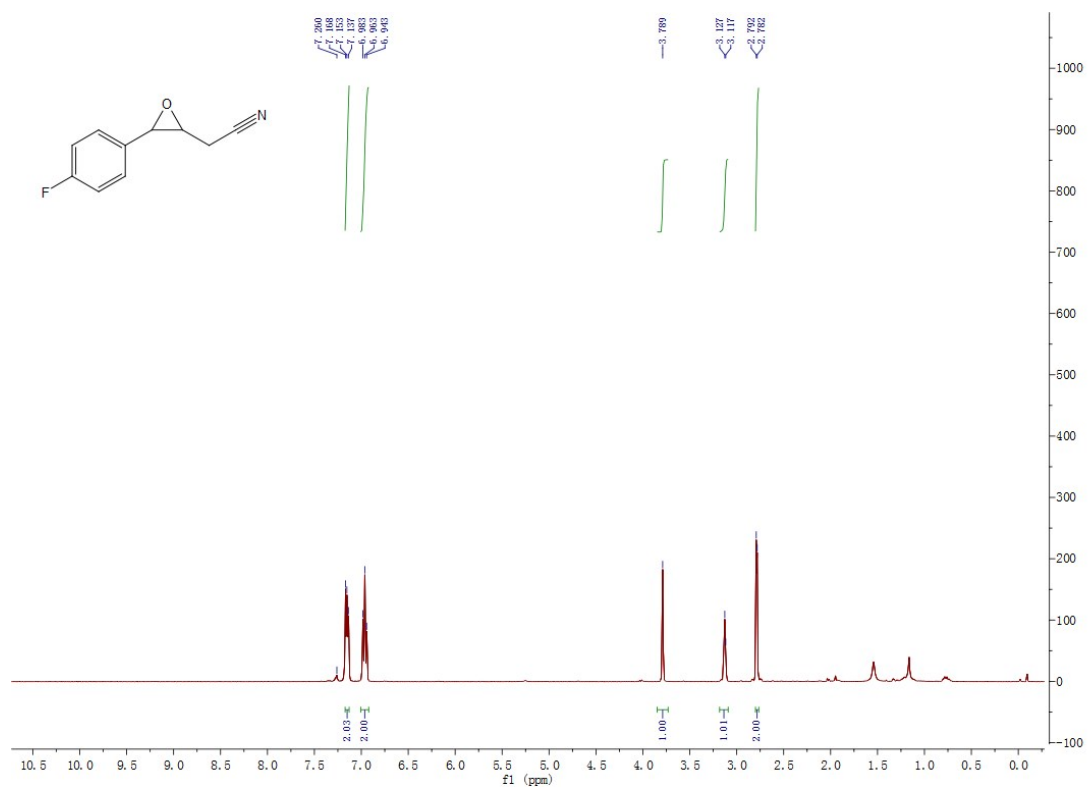

$^1\text{H}$  NMR (500 MHz,  $\text{CDCl}_3$ ) of compound **1c**

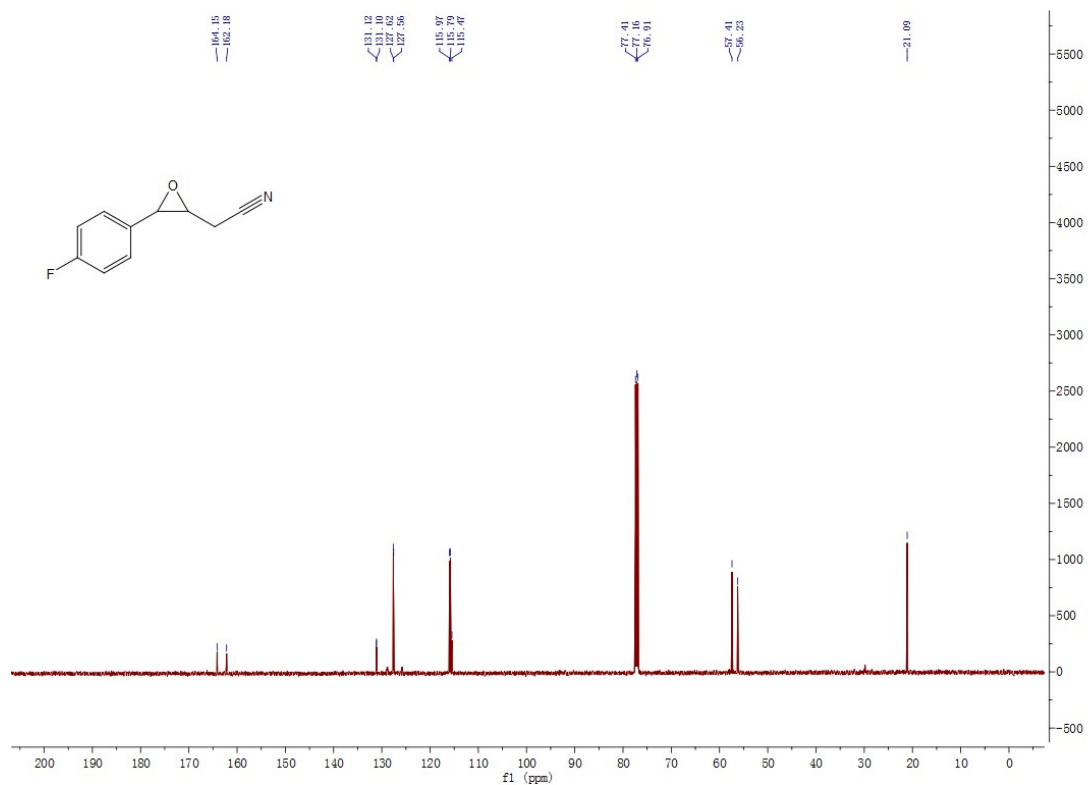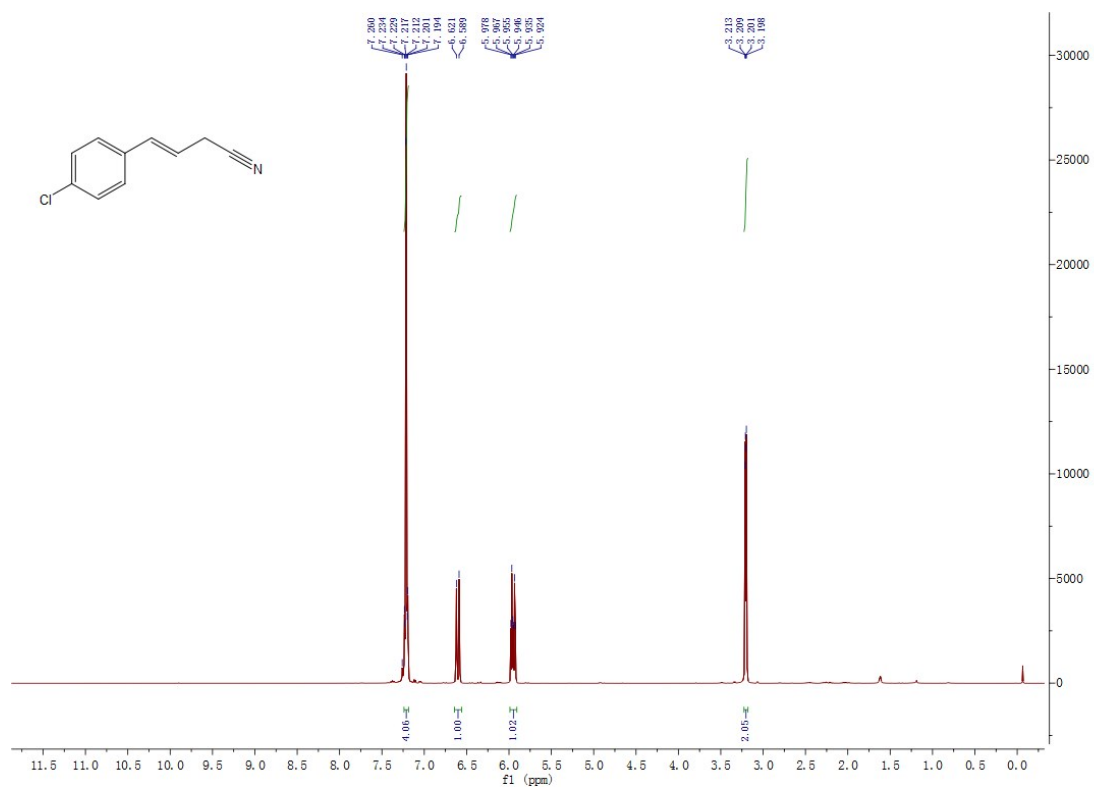

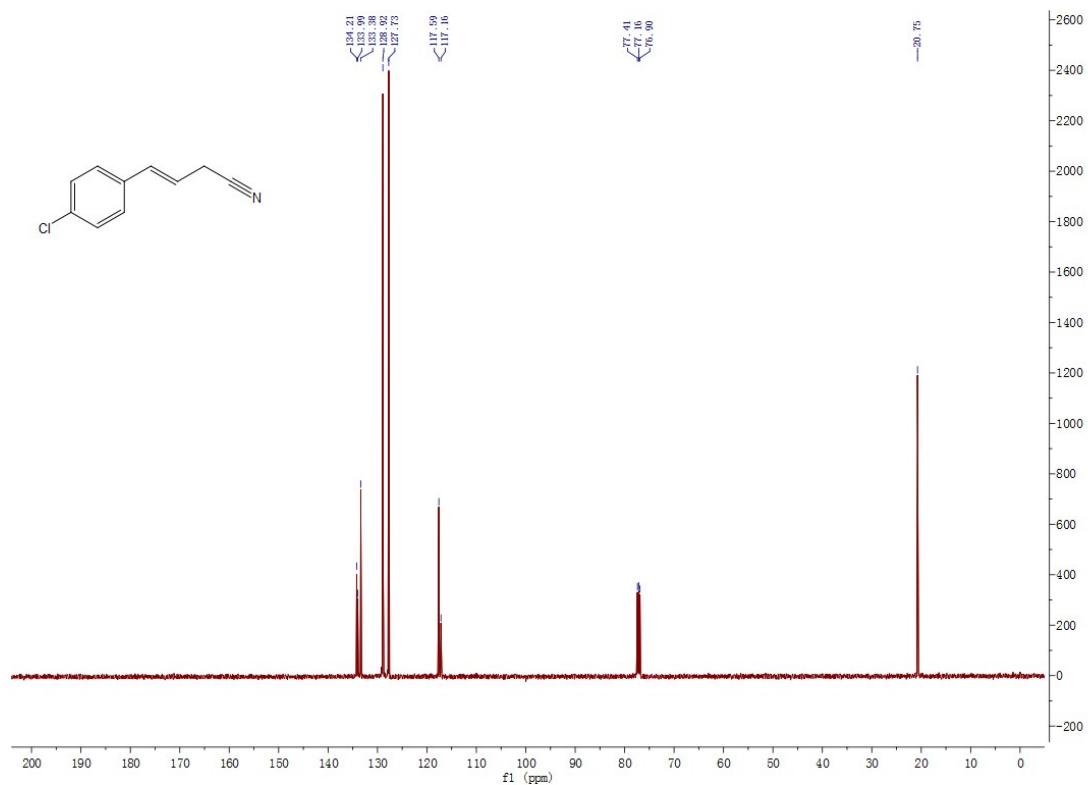

$^{13}\text{C}$  NMR (125 MHz,  $\text{CDCl}_3$ ) of compound **1d'**

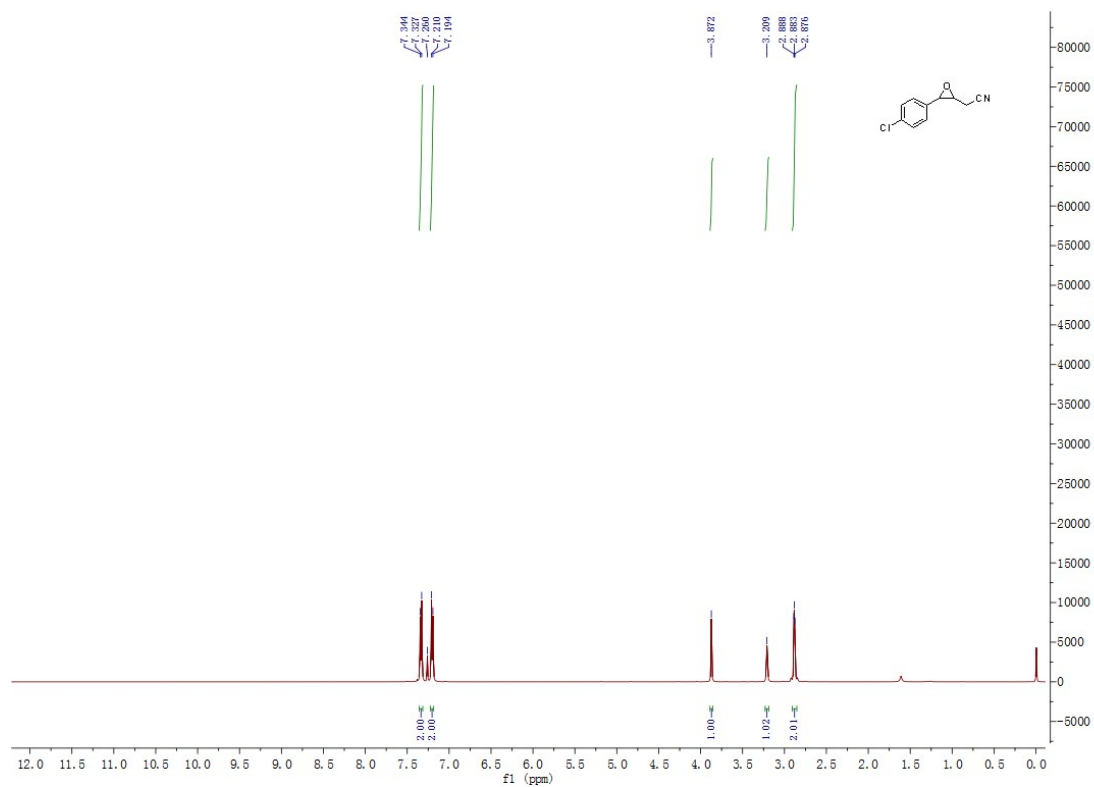

$^1\text{H}$  NMR (500 MHz,  $\text{CDCl}_3$ ) of compound **1d**

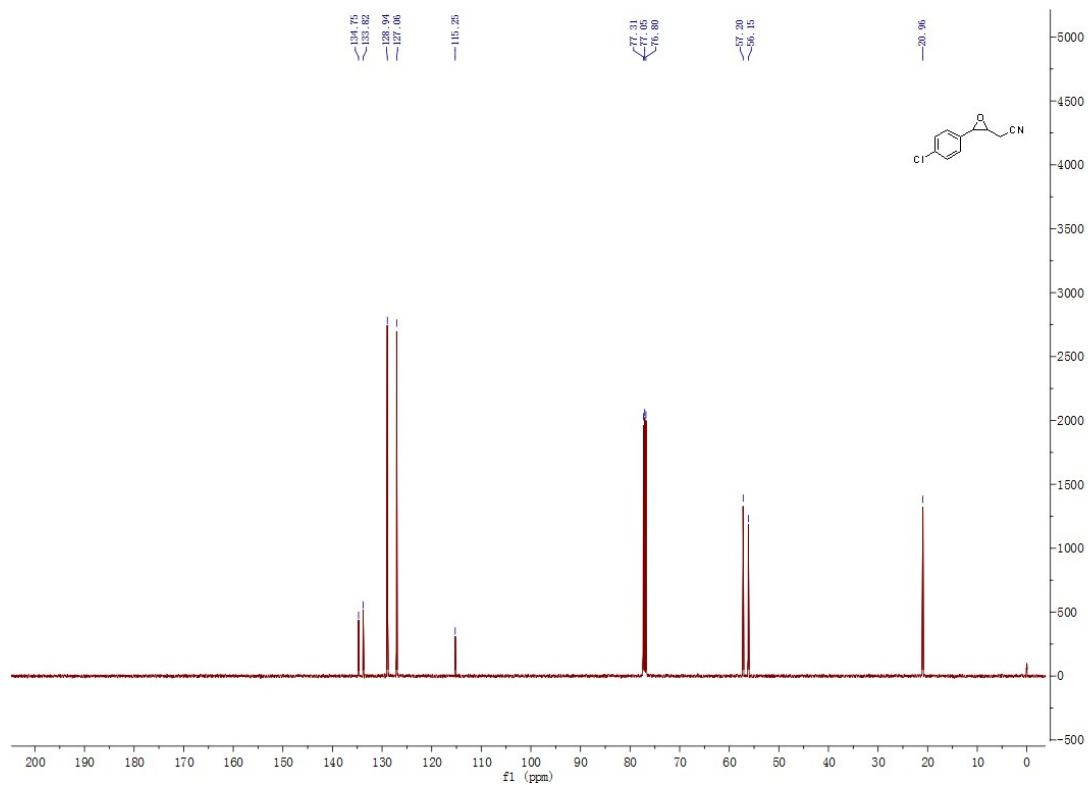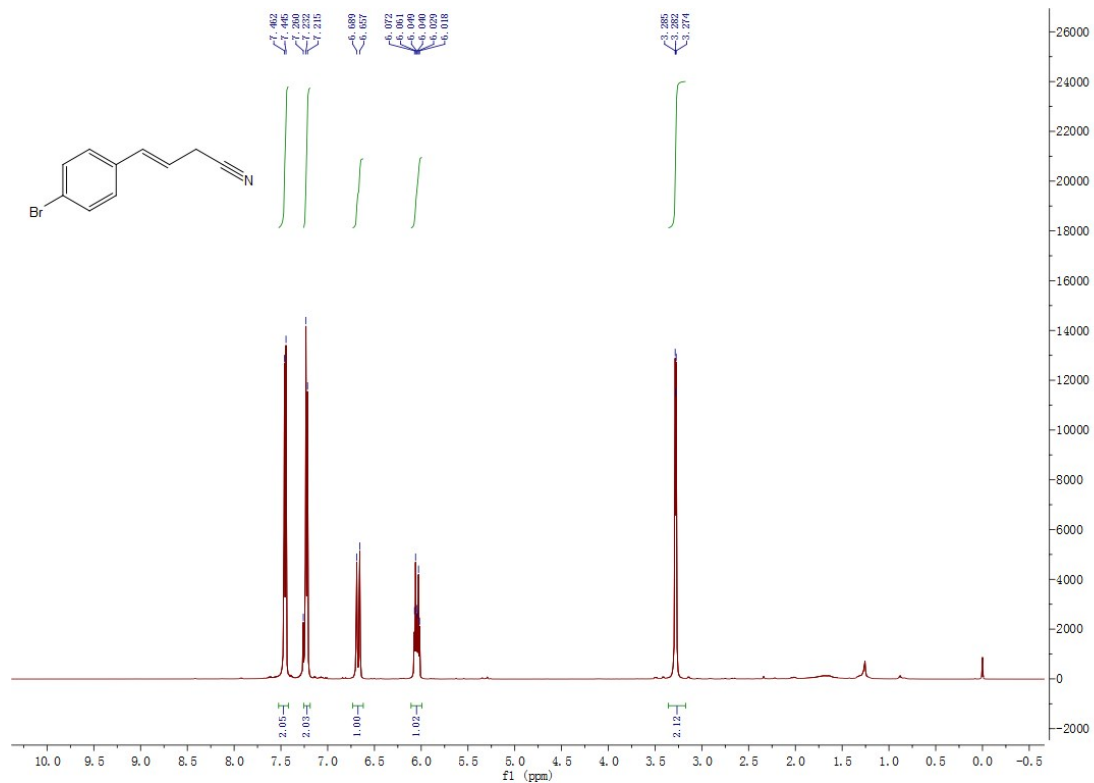

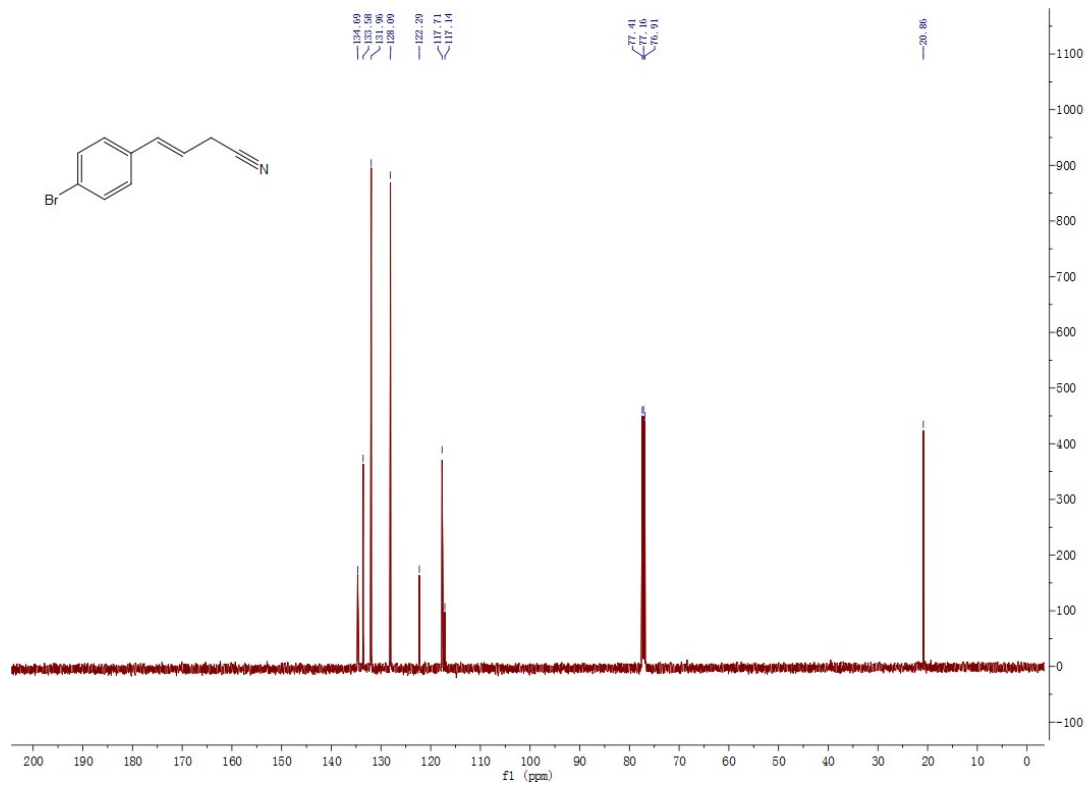

<sup>13</sup>C NMR (125 MHz, CDCl<sub>3</sub>) of compound **1e'**

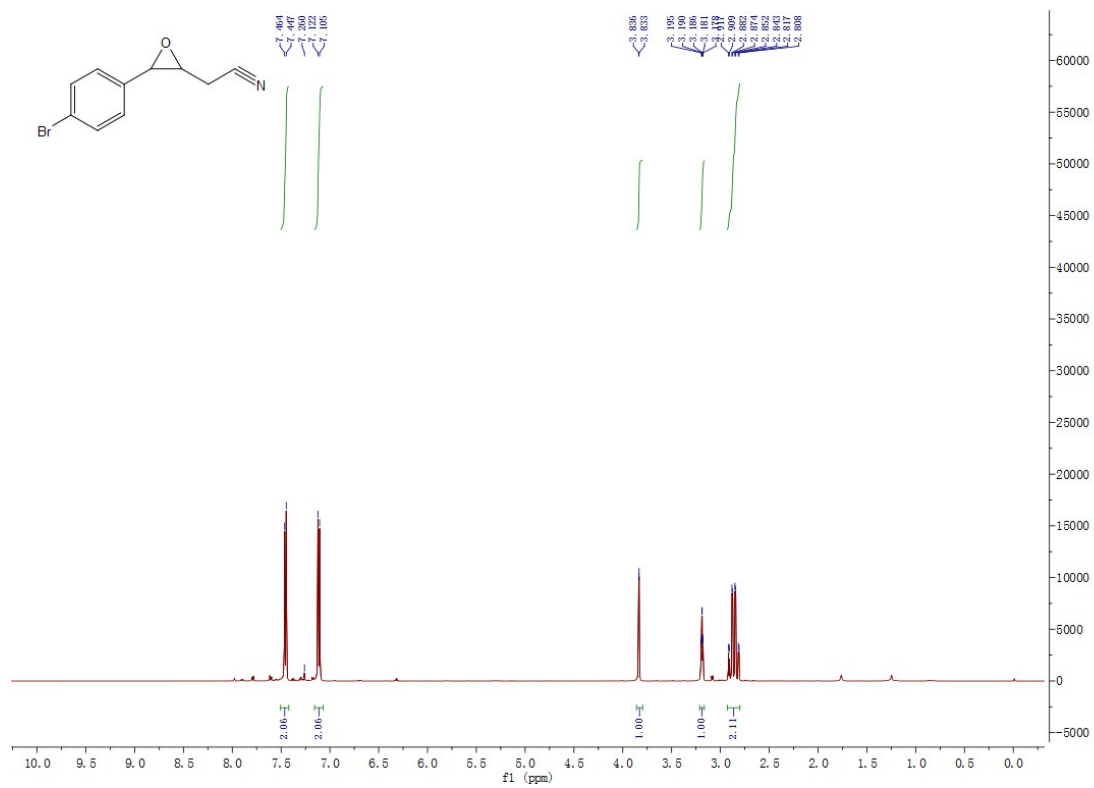

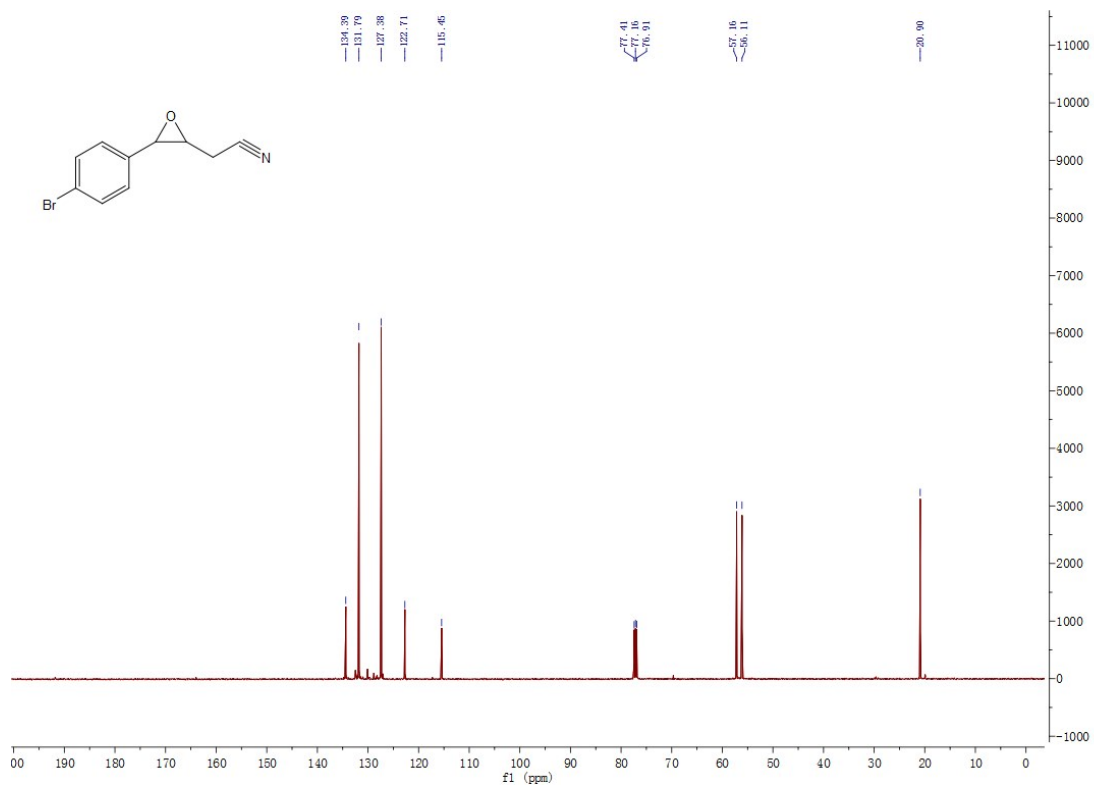

## 8. NMR spectra for all products

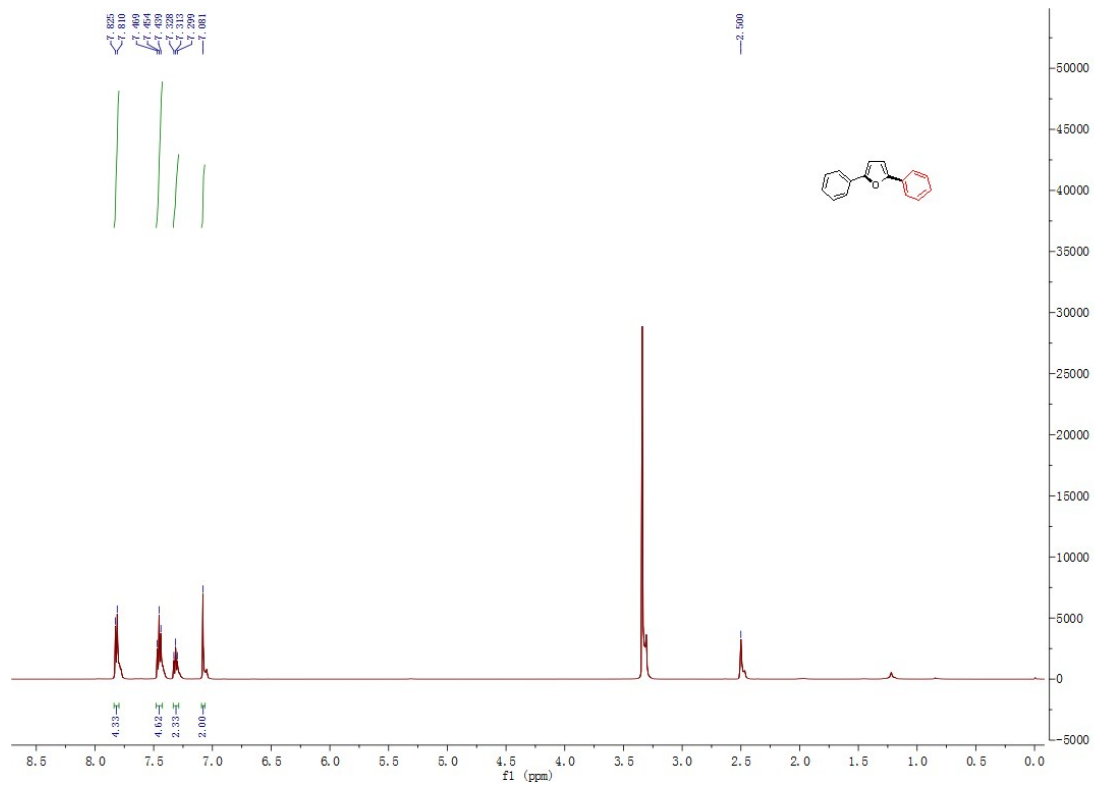



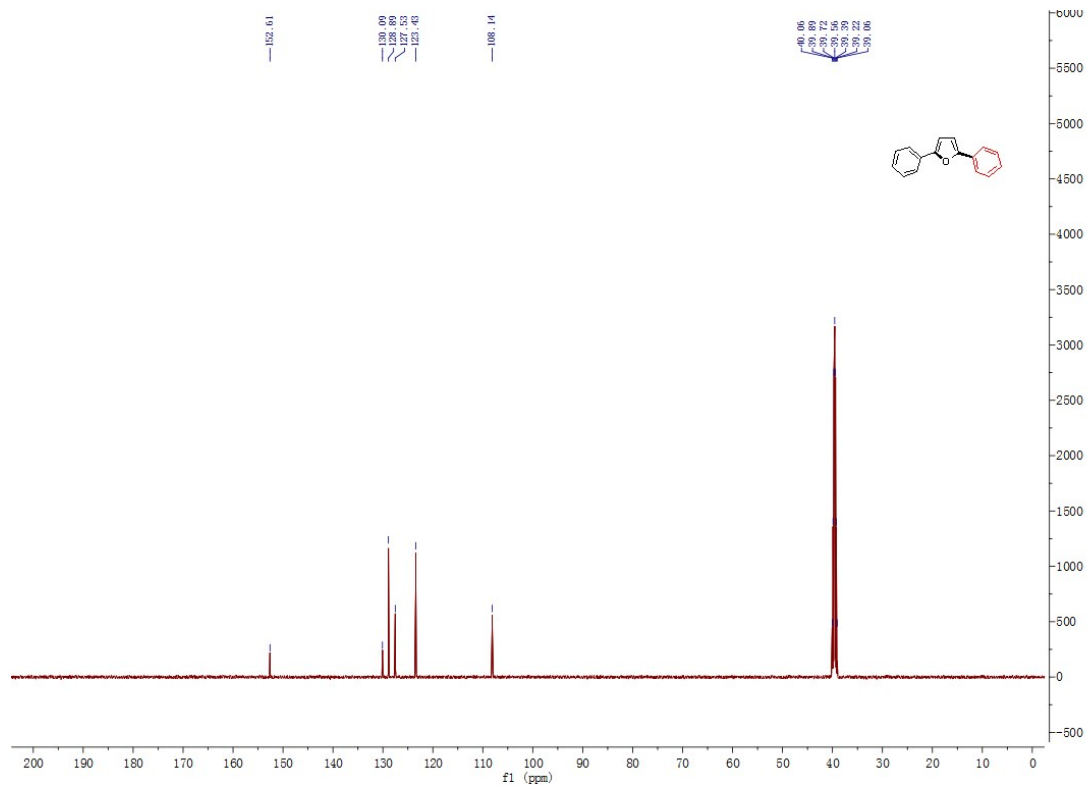

$^{13}\text{C}$  NMR (125 MHz,  $\text{DMSO-}d_6$ ) of compound **3a**

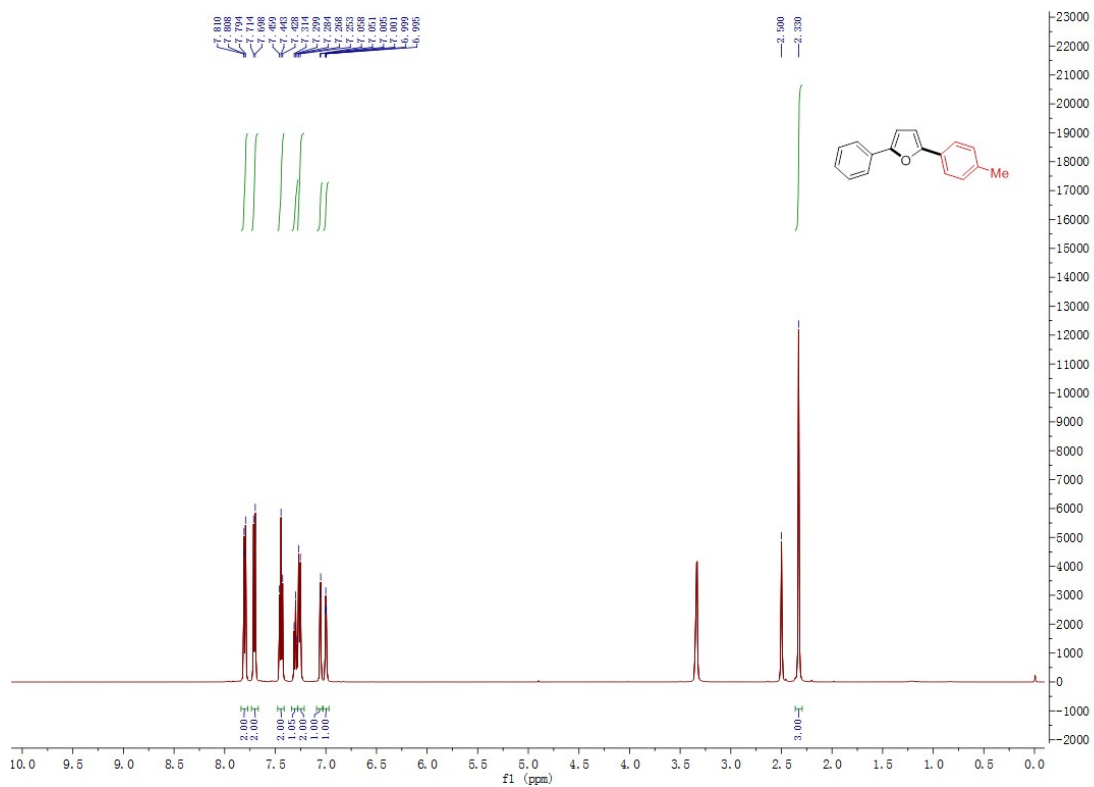

$^1\text{H}$  NMR (500 MHz,  $\text{DMSO-}d_6$ ) of compound **3b**

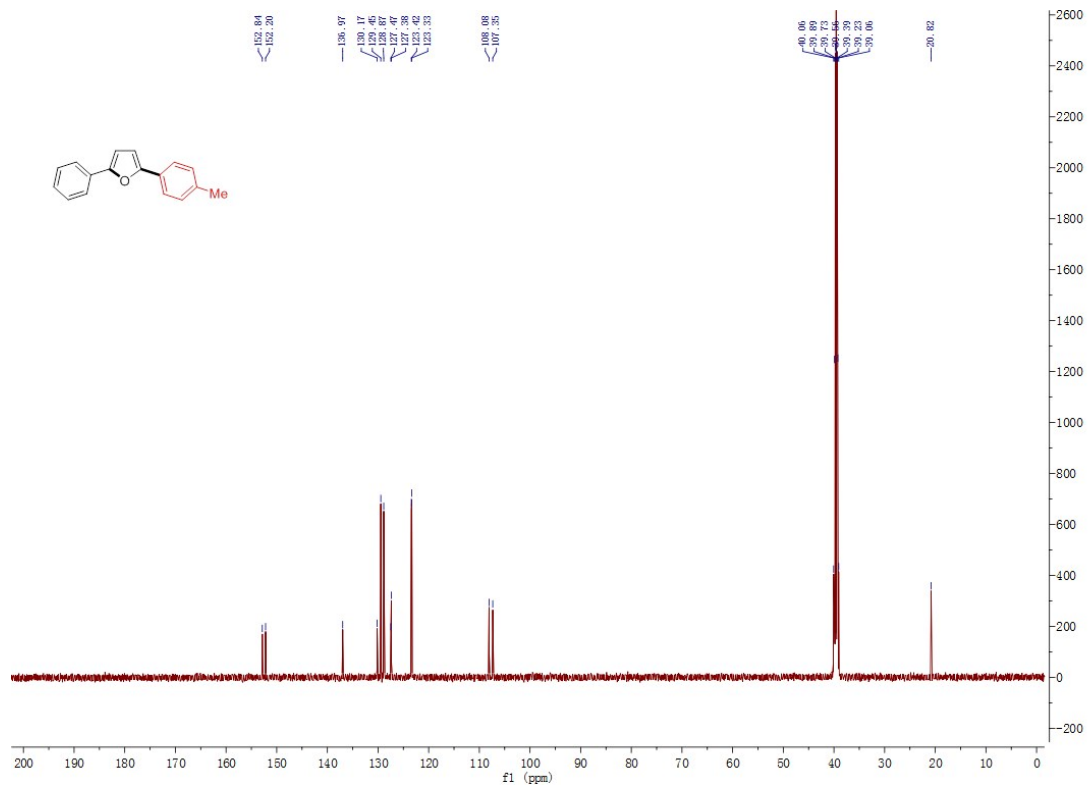

$^{13}\text{C}$  NMR (125 MHz,  $\text{DMSO-}d_6$ ) of compound **3b**

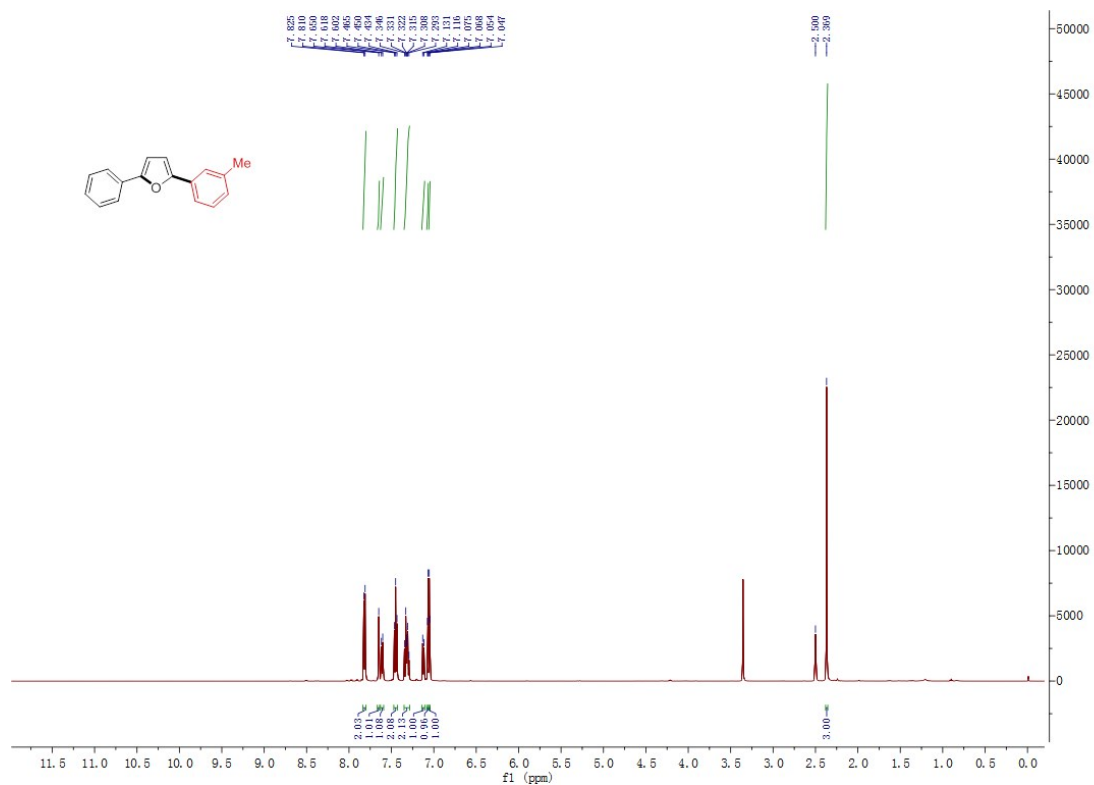

$^1\text{H}$  NMR (500 MHz,  $\text{DMSO-}d_6$ ) of compound **3b**

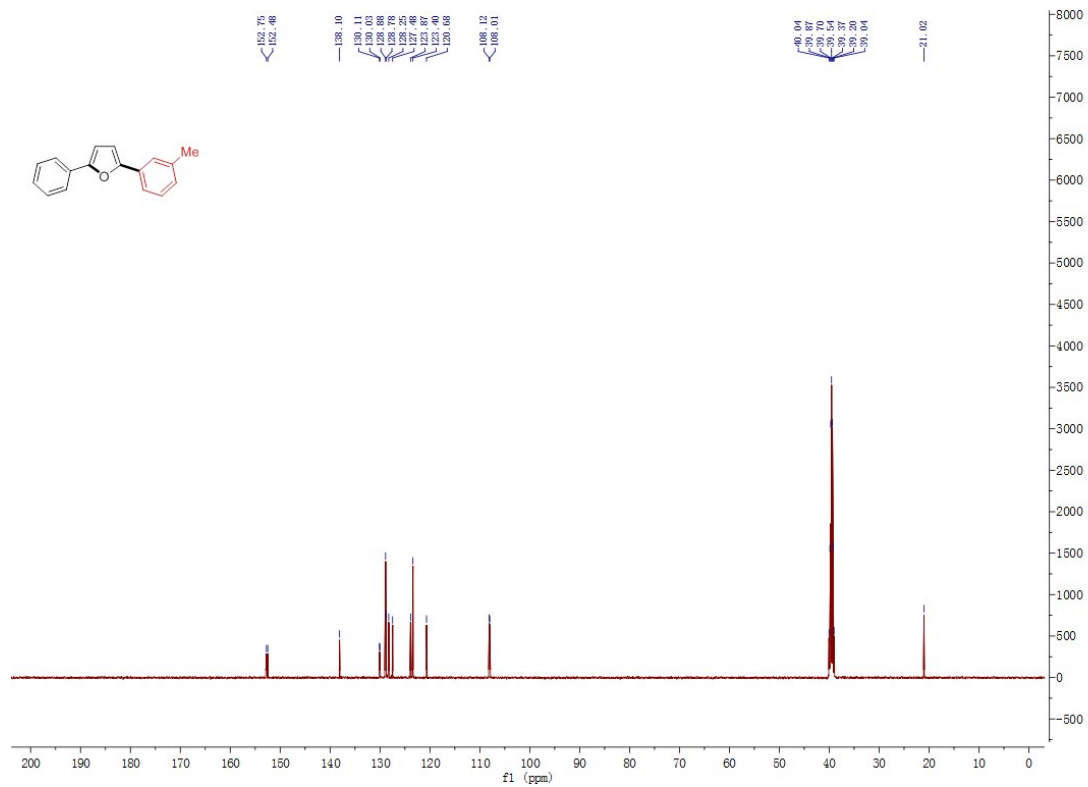

<sup>13</sup>C NMR (125 MHz, DMSO-*d*<sub>6</sub>) of compound **3c**

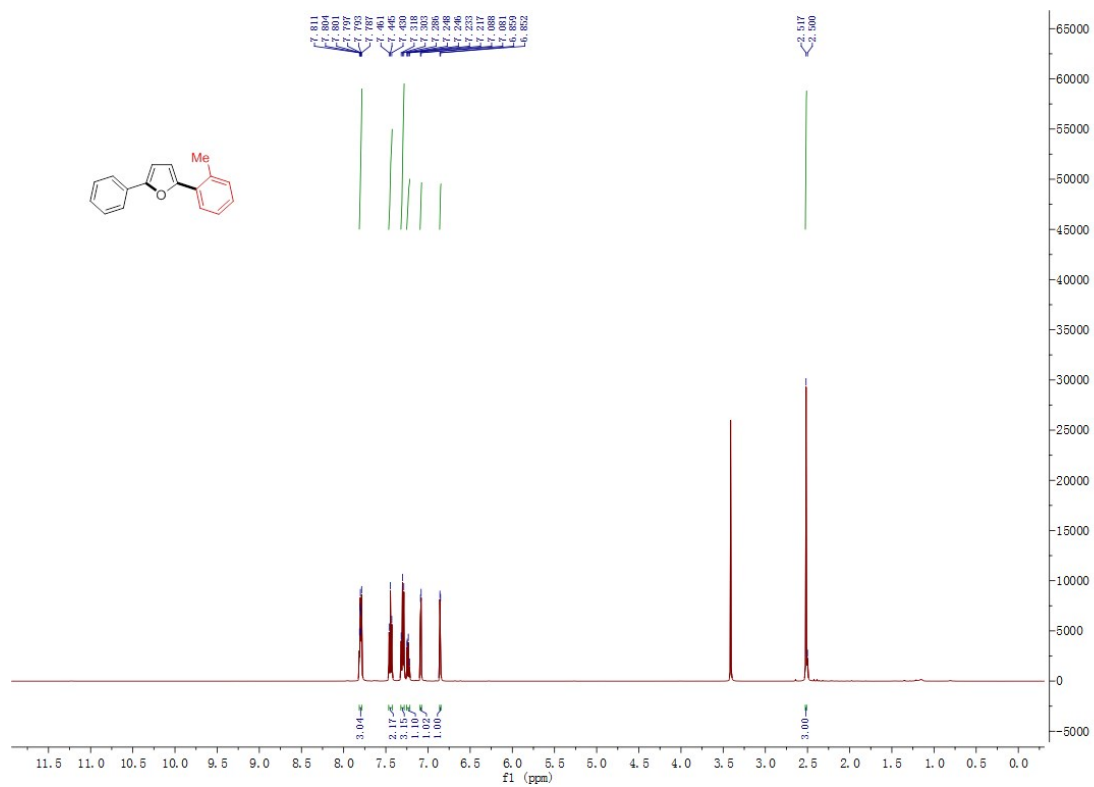

<sup>1</sup>H NMR (500 MHz, DMSO-*d*<sub>6</sub>) of compound **3d**

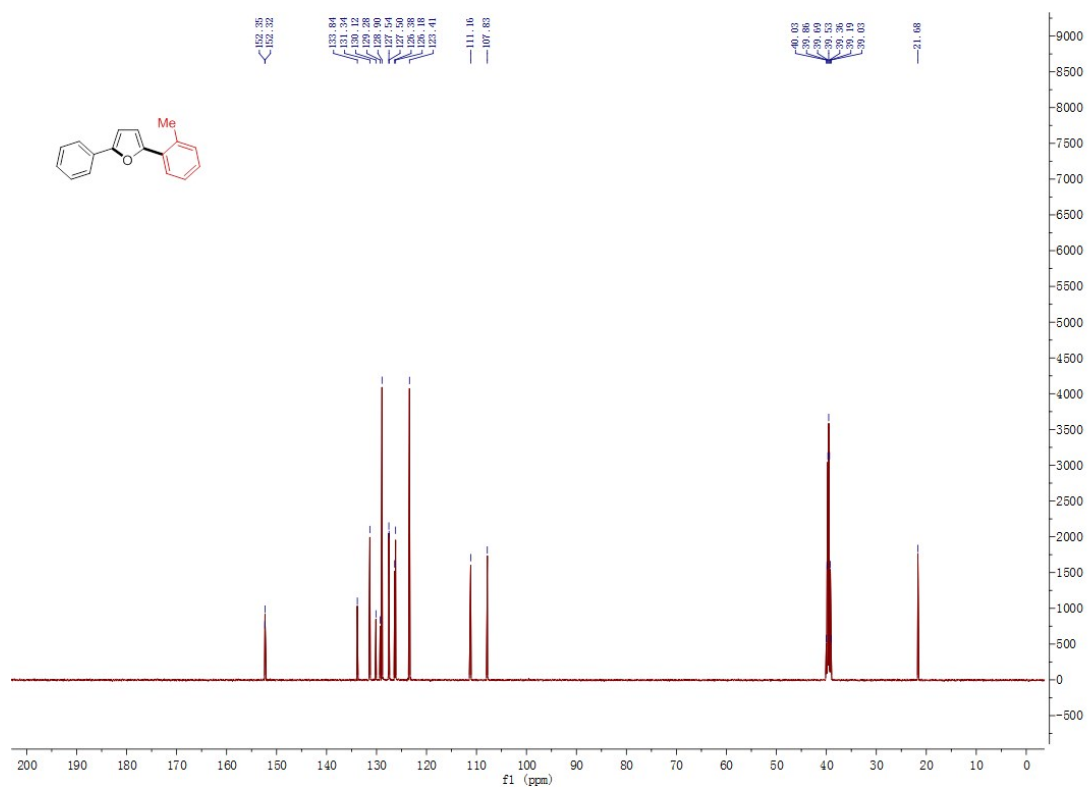

<sup>13</sup>C NMR (125 MHz, DMSO-*d*<sub>6</sub>) of compound 3d

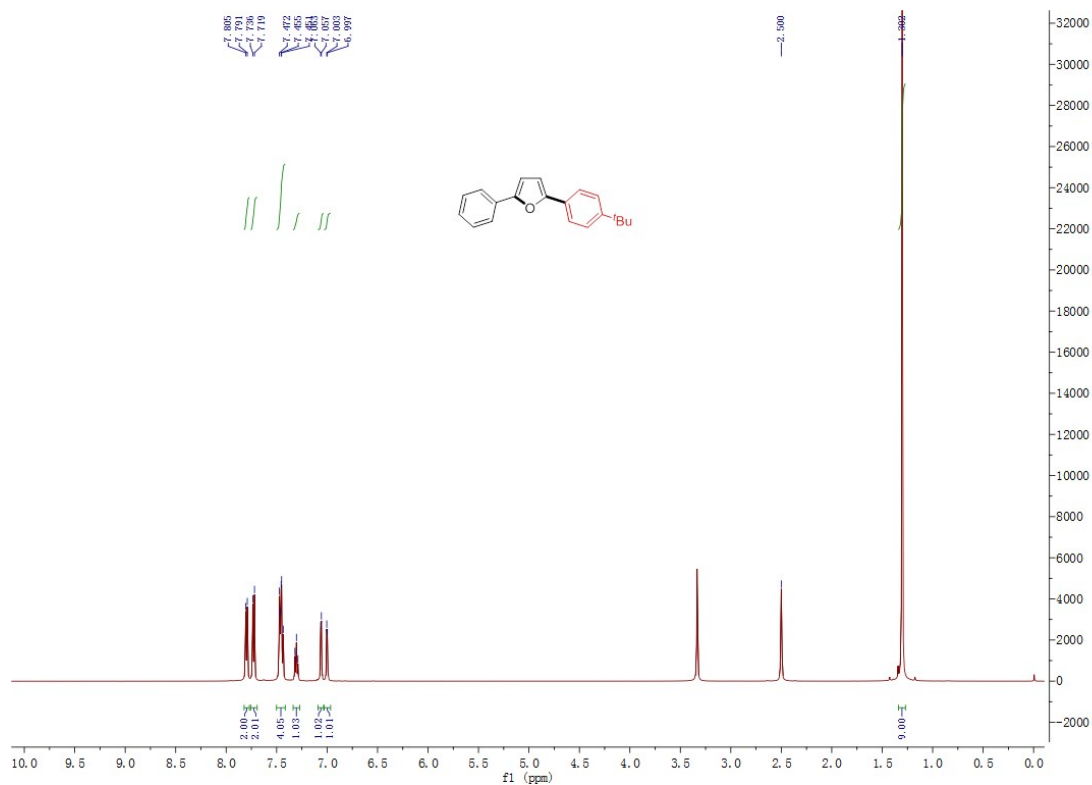

<sup>1</sup>H NMR (500 MHz, DMSO-*d*<sub>6</sub>) of compound 3e

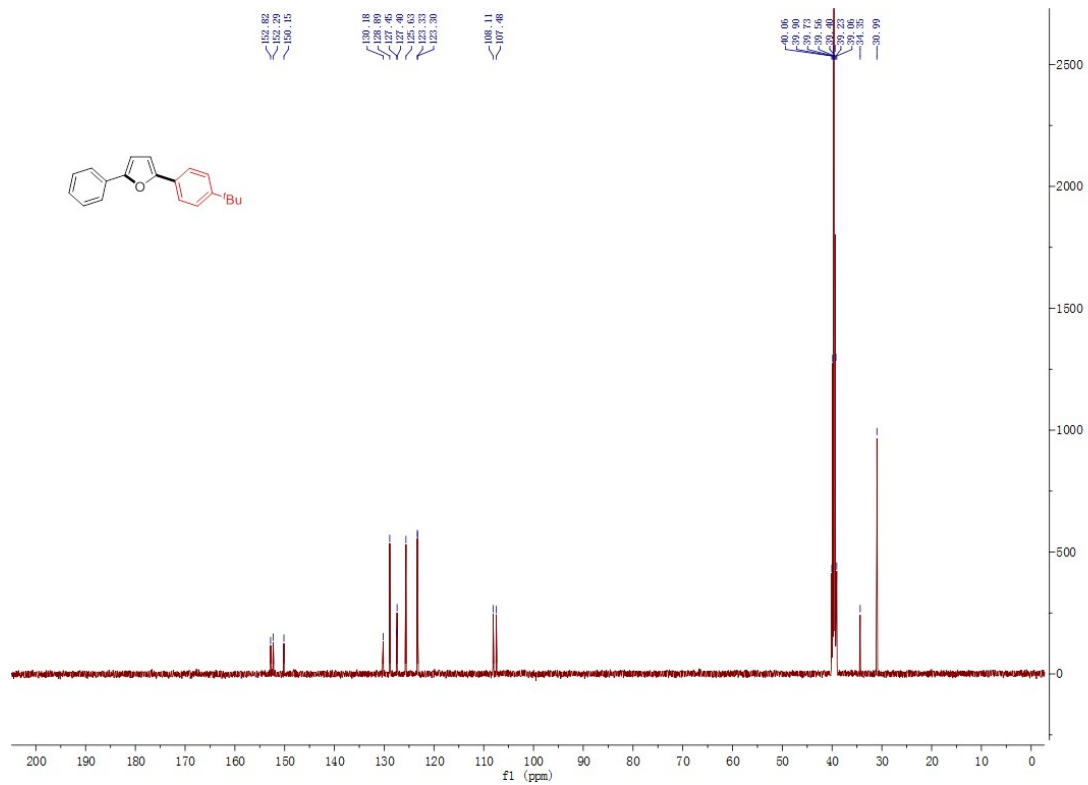

$^{13}\text{C}$  NMR (125 MHz, DMSO- $d_6$ ) of compound 3e

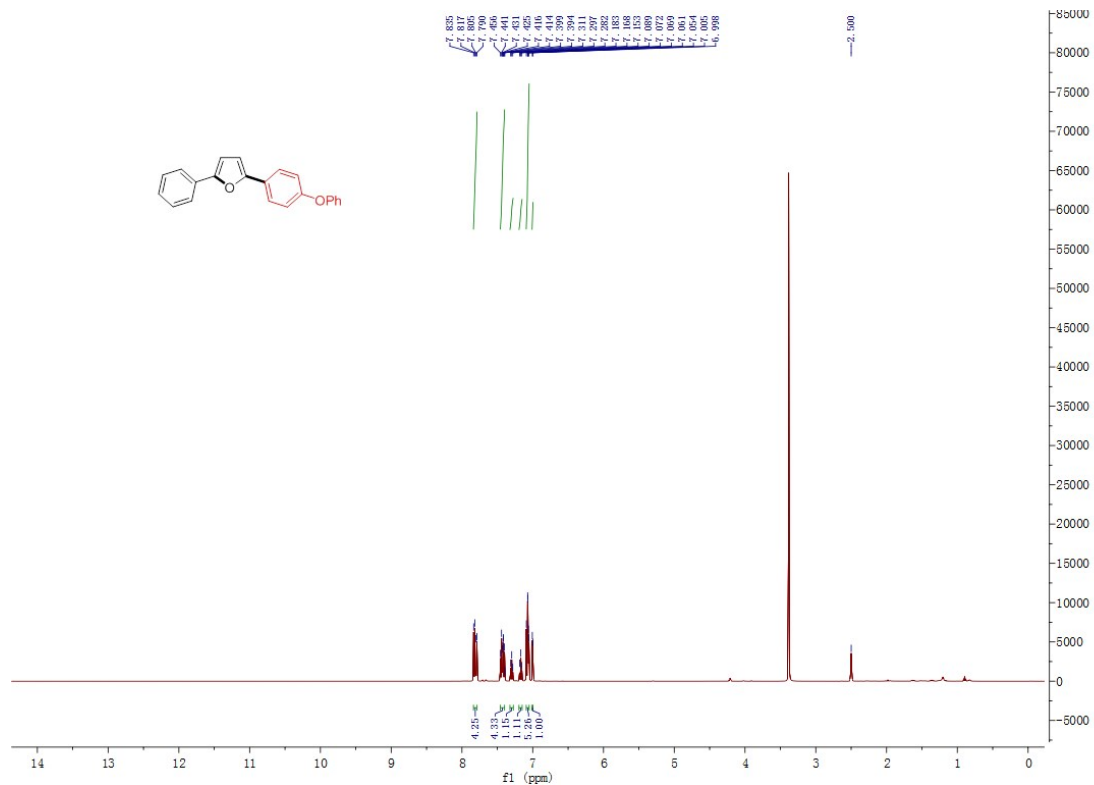

$^1\text{H}$  NMR (500 MHz, DMSO- $d_6$ ) of compound 3f

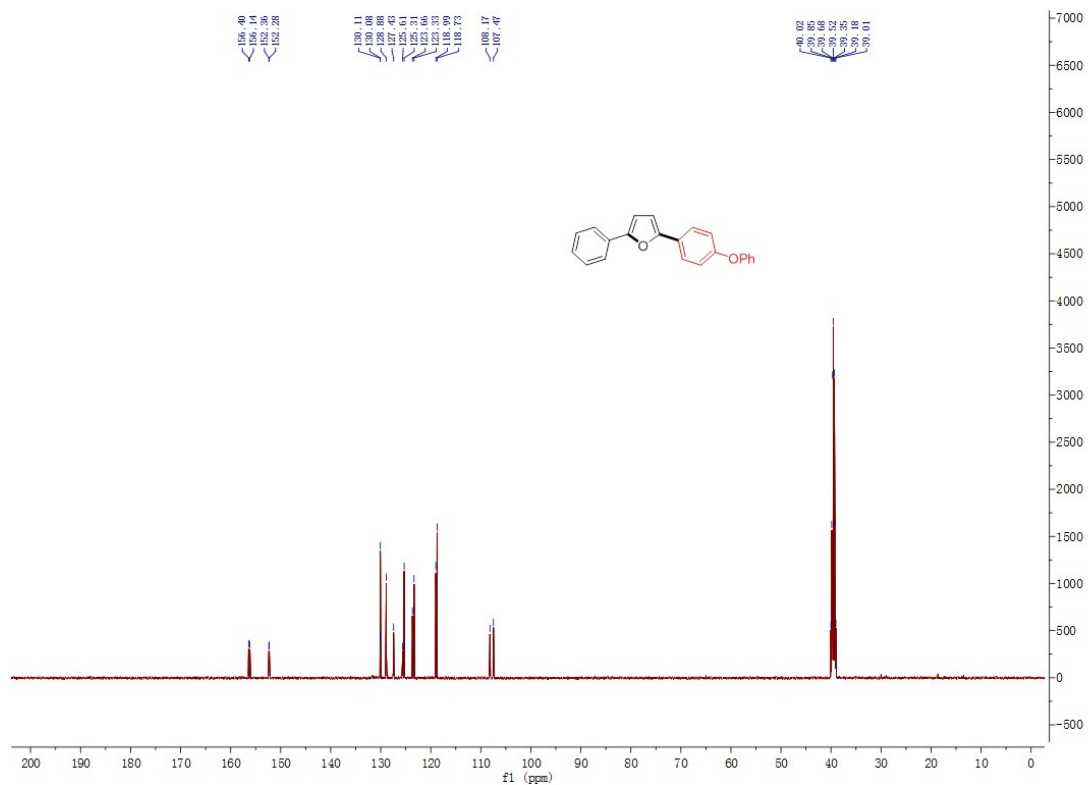

$^{13}\text{C}$  NMR (125 MHz, DMSO- $d_6$ ) of compound **3f**

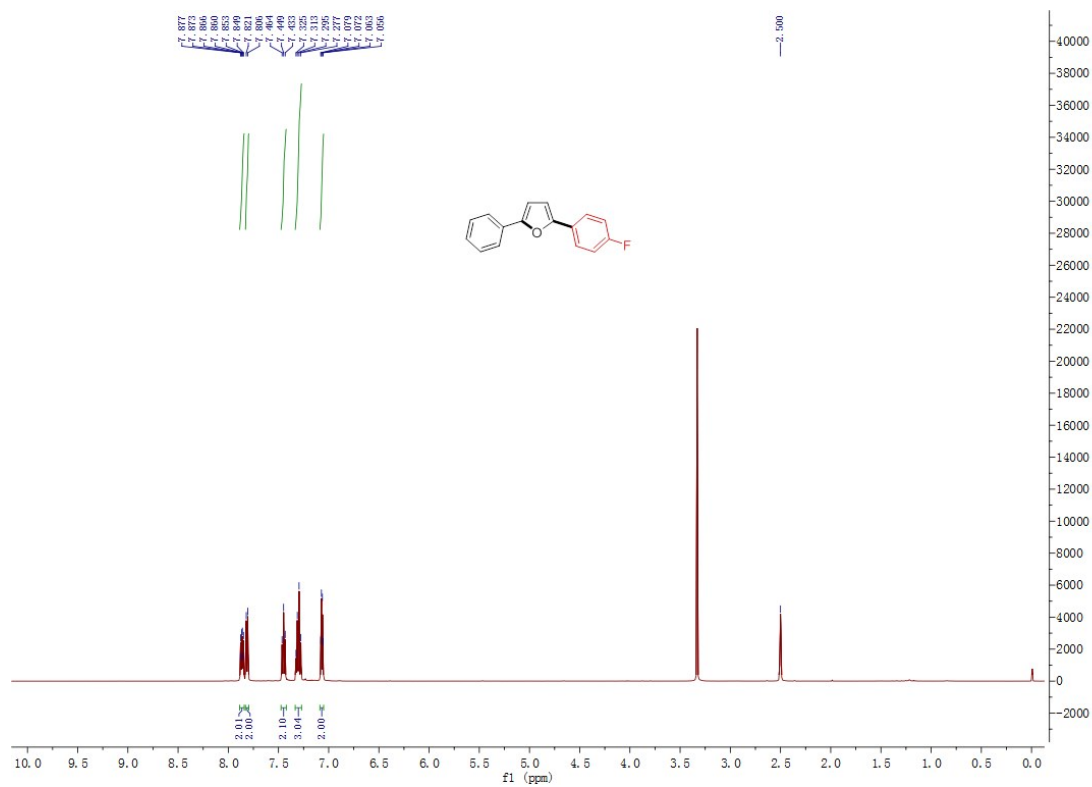

$^1\text{H}$  NMR (500 MHz, DMSO- $d_6$ ) of compound **3g**

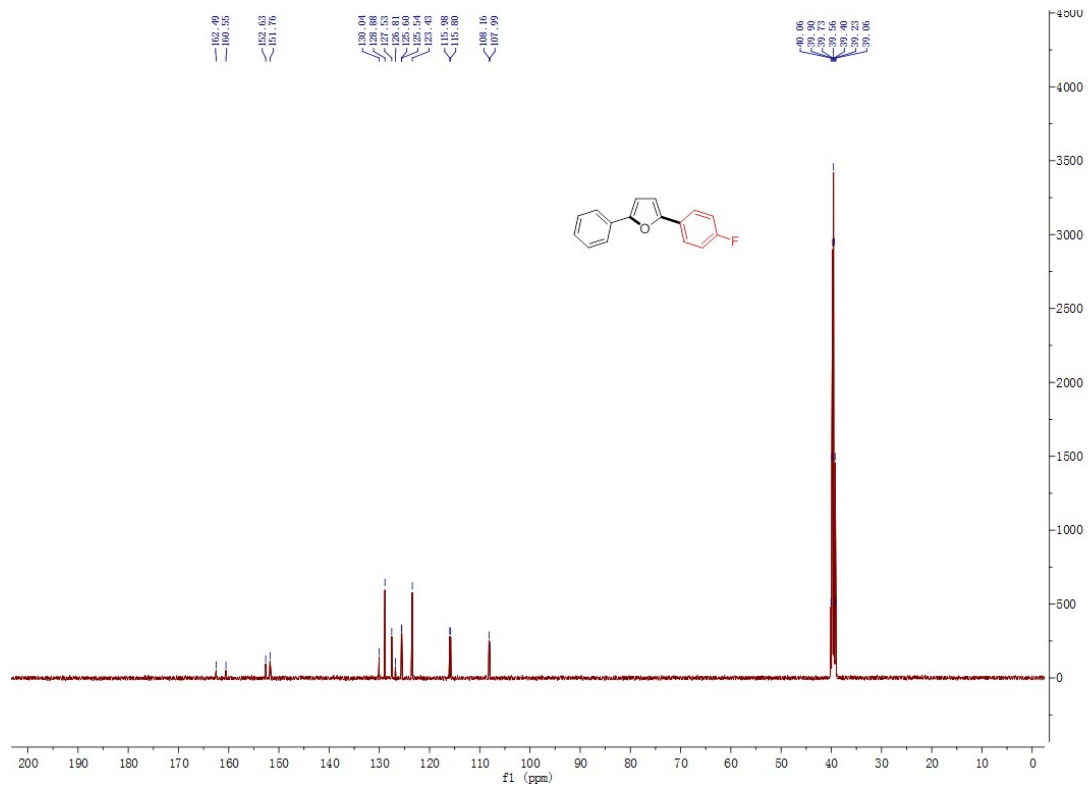

<sup>13</sup>C NMR (125 MHz, DMSO-*d*<sub>6</sub>) of compound **3g**

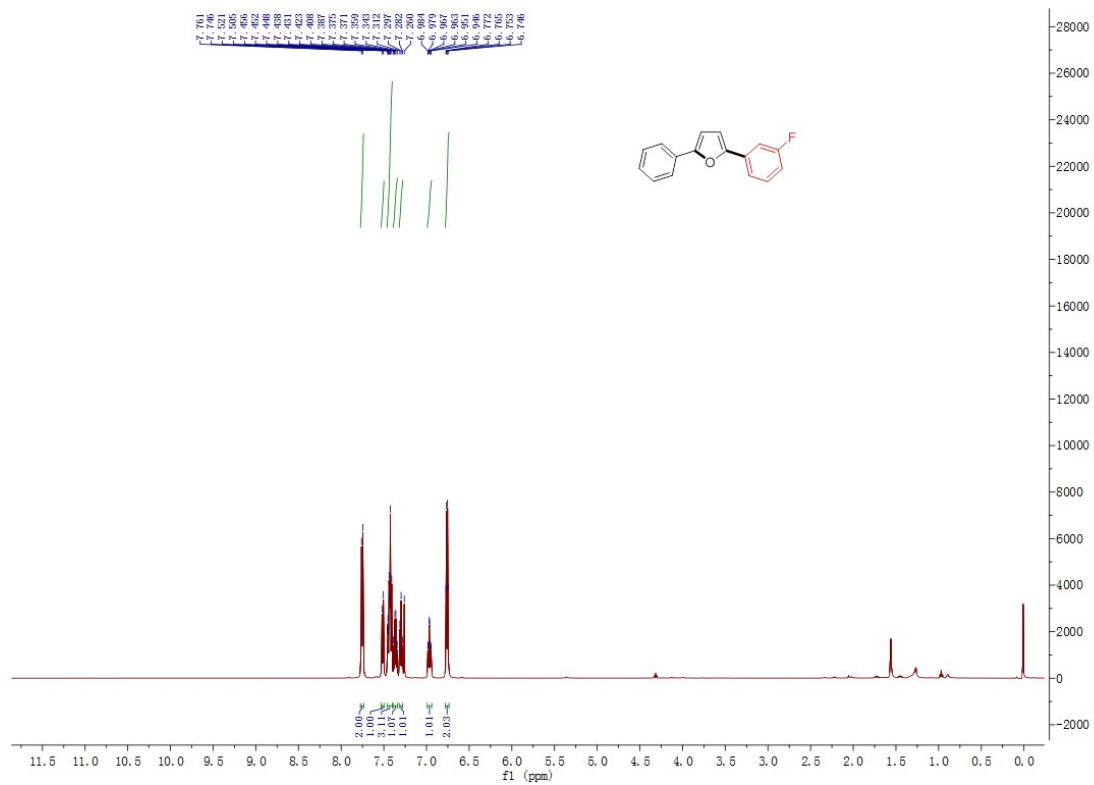

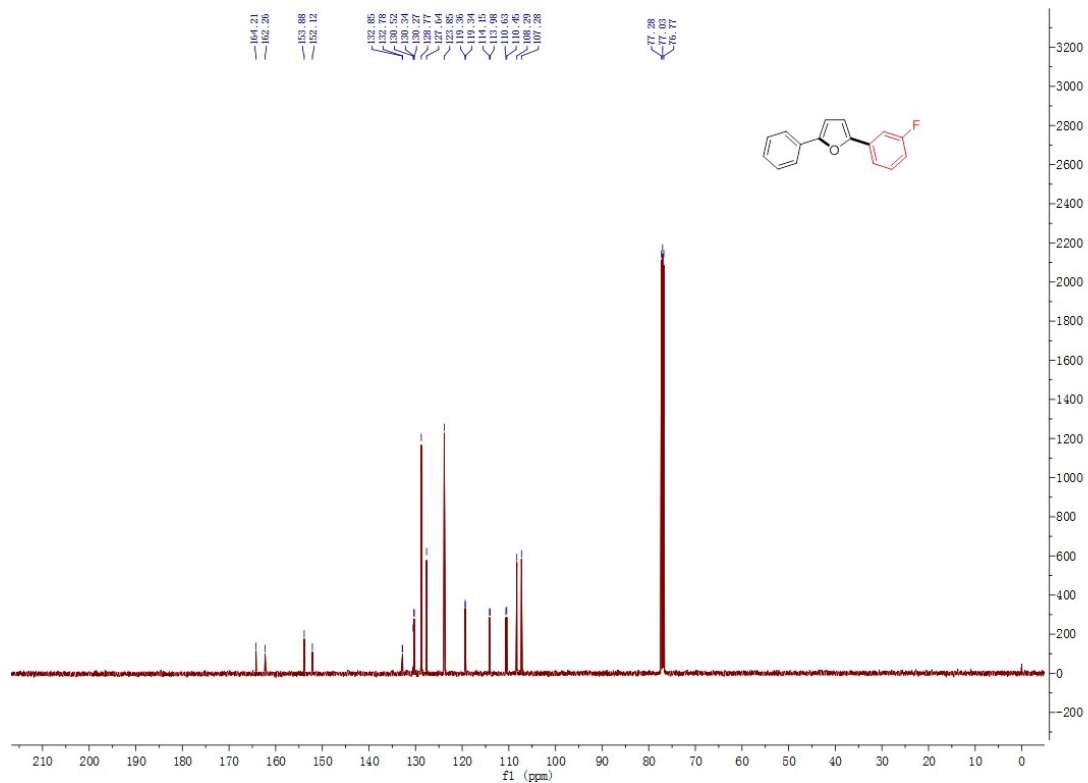

<sup>13</sup>C NMR (125 MHz, CDCl<sub>3</sub>) of compound **3h**

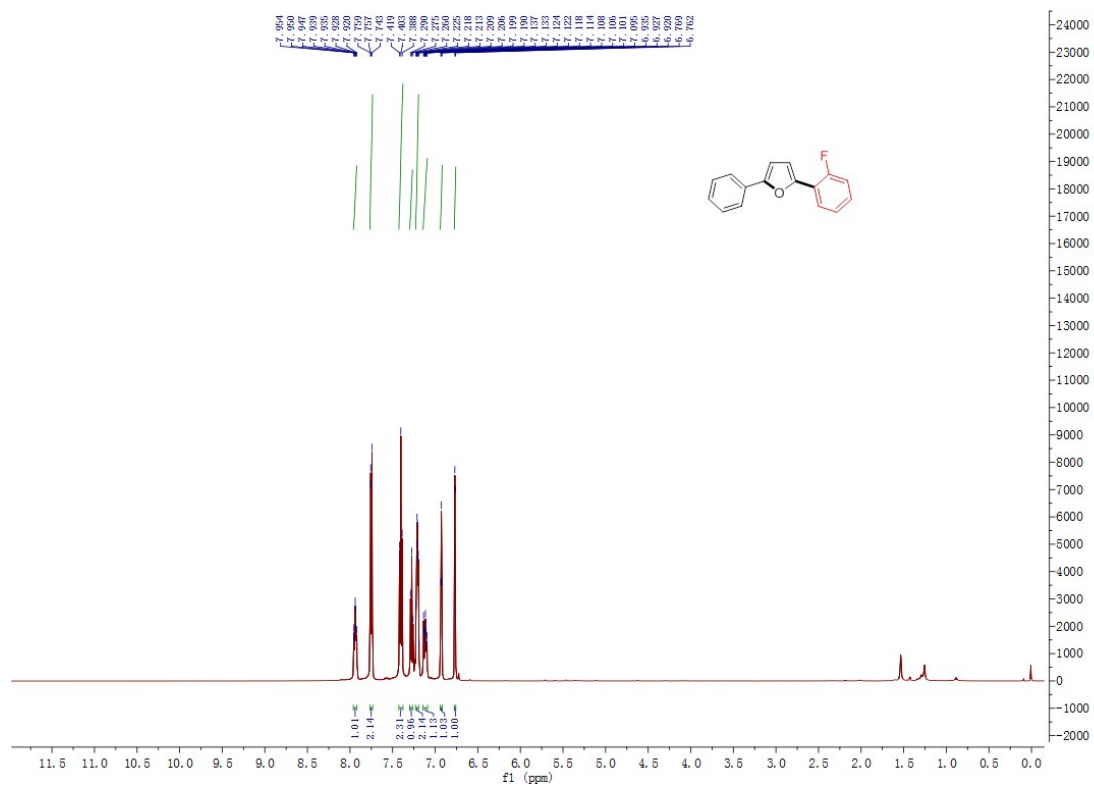

<sup>1</sup>H NMR (500 MHz, CDCl<sub>3</sub>) of compound **3i**



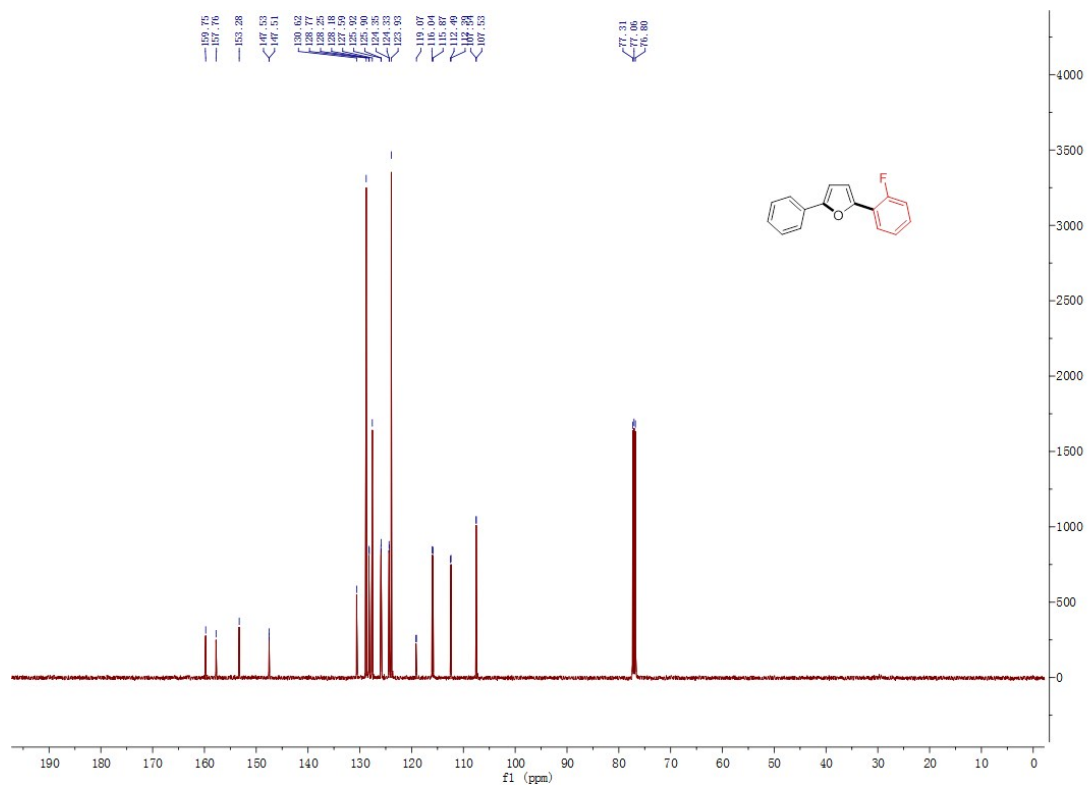

$^{13}\text{C}$  NMR (125 MHz,  $\text{CDCl}_3$ ) of compound **3i**

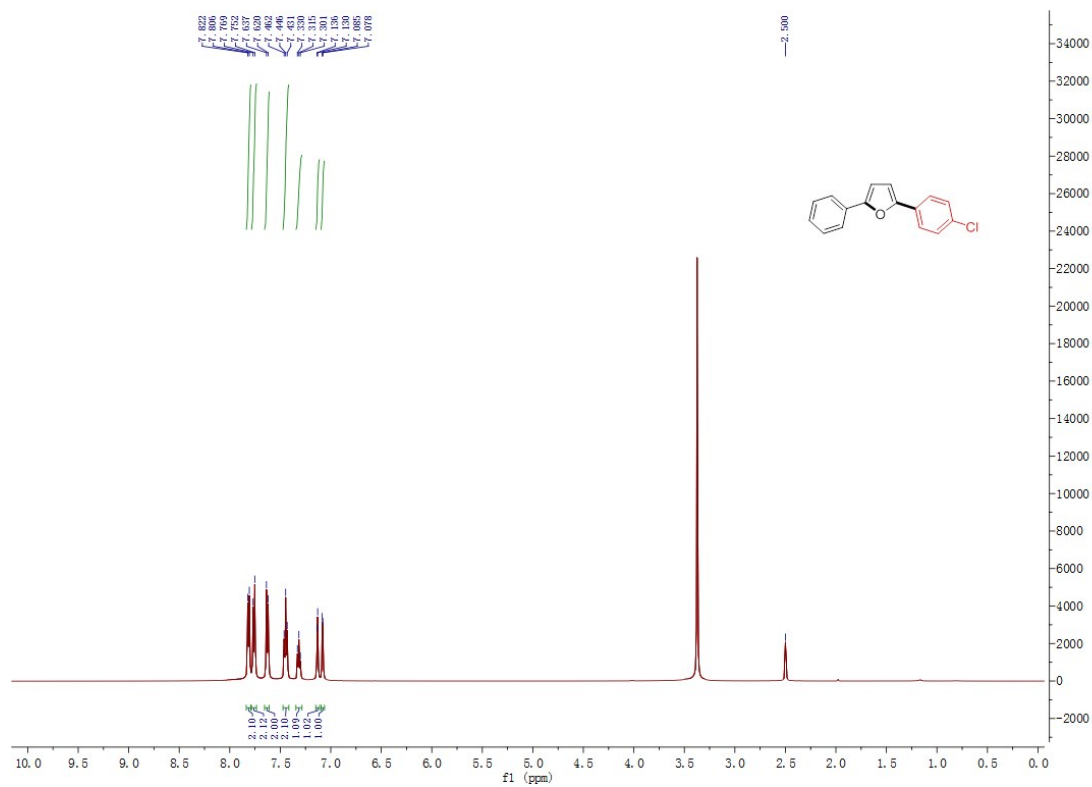

$^1\text{H}$  NMR (500 MHz,  $\text{DMSO}-d_6$ ) of compound **3j**

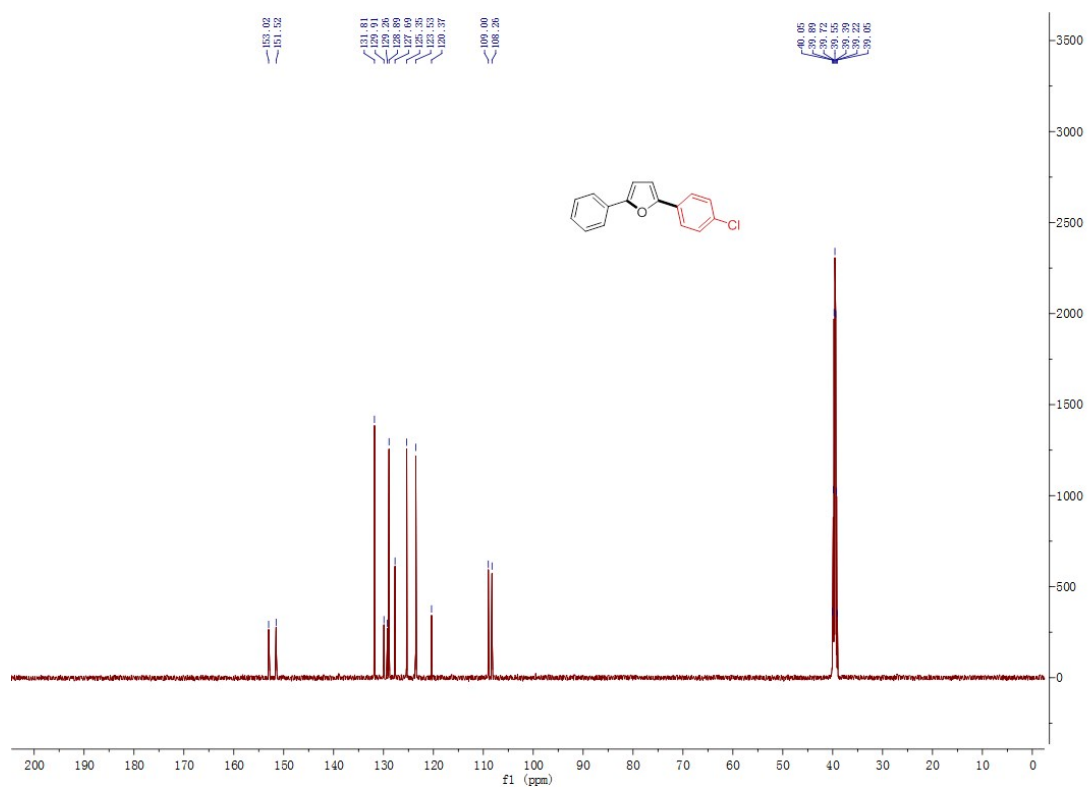

$^{13}\text{C}$  NMR (125 MHz,  $\text{DMSO-}d_6$ ) of compound **3j**

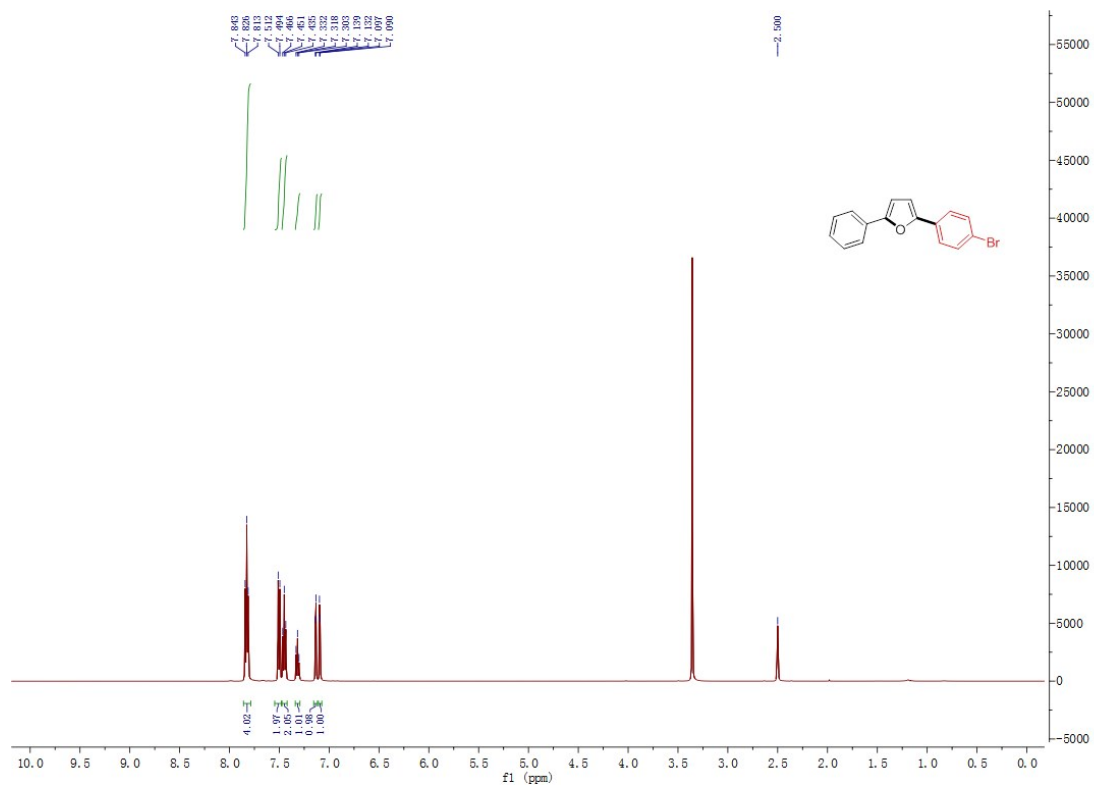

$^1\text{H}$  NMR (500 MHz,  $\text{DMSO-}d_6$ ) of compound **3k**

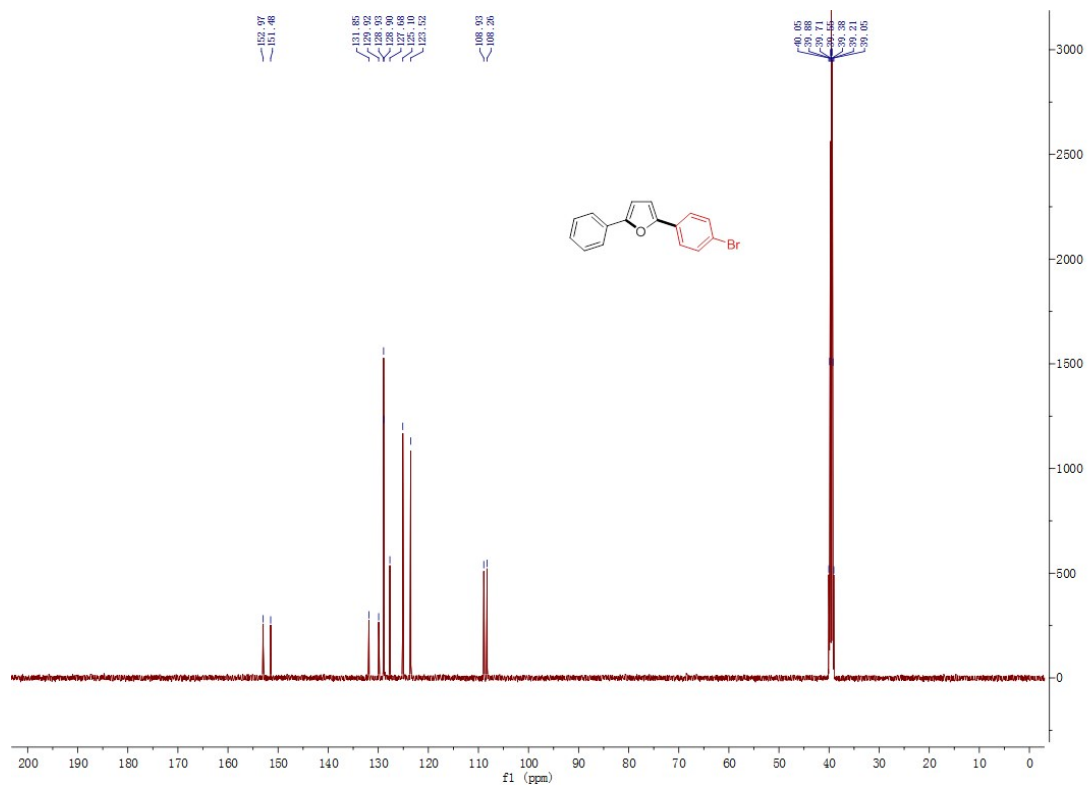

$^{13}\text{C}$  NMR (125 MHz,  $\text{DMSO-}d_6$ ) of compound **3k**

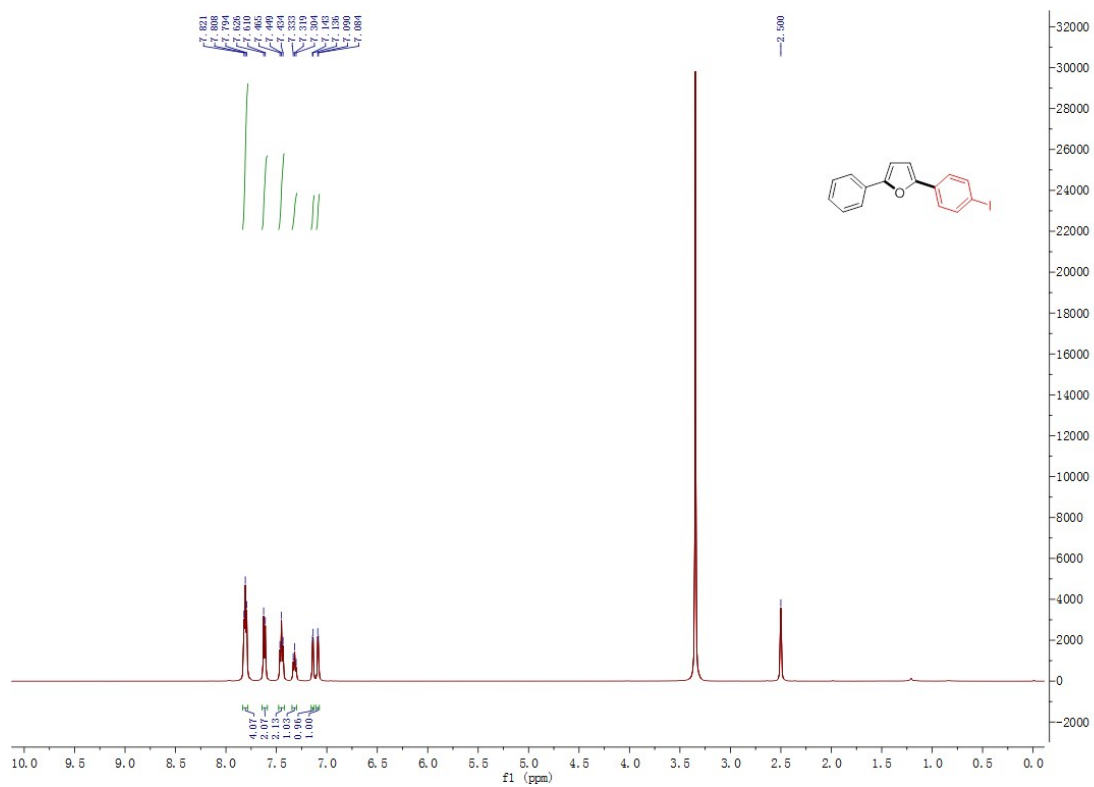

$^1\text{H}$  NMR (500 MHz,  $\text{DMSO-}d_6$ ) of compound **3l**

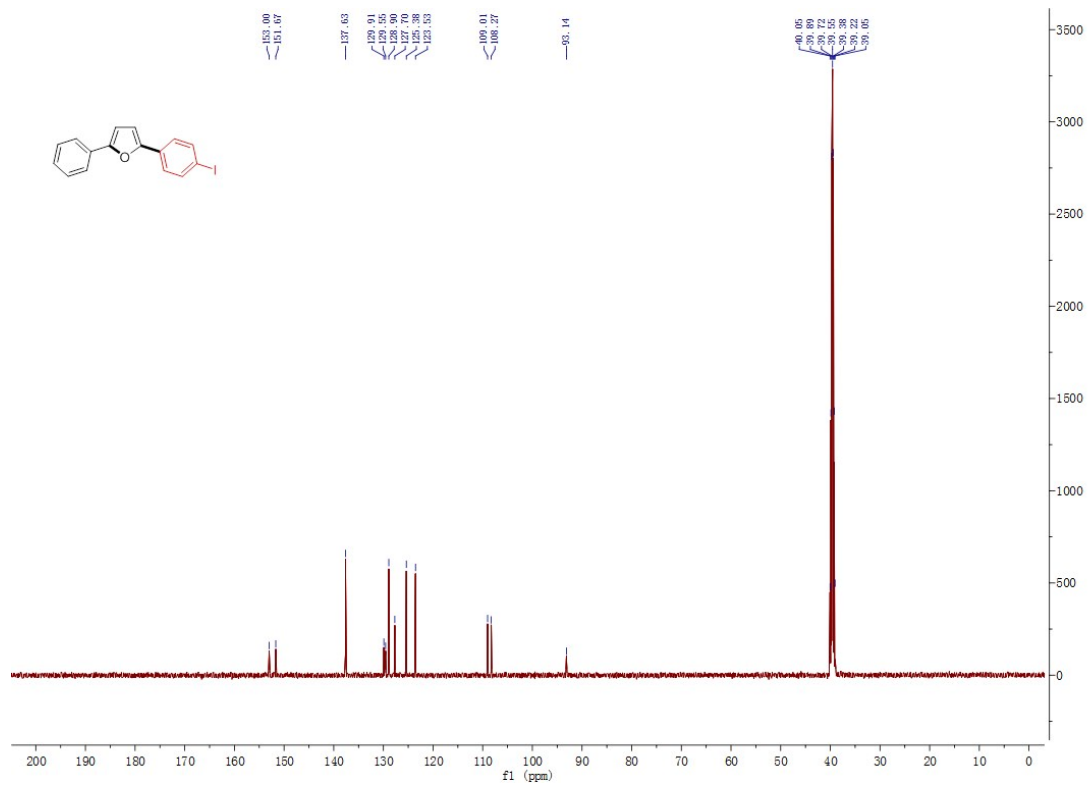

$^{13}\text{C}$  NMR (125 MHz,  $\text{DMSO-}d_6$ ) of compound 31

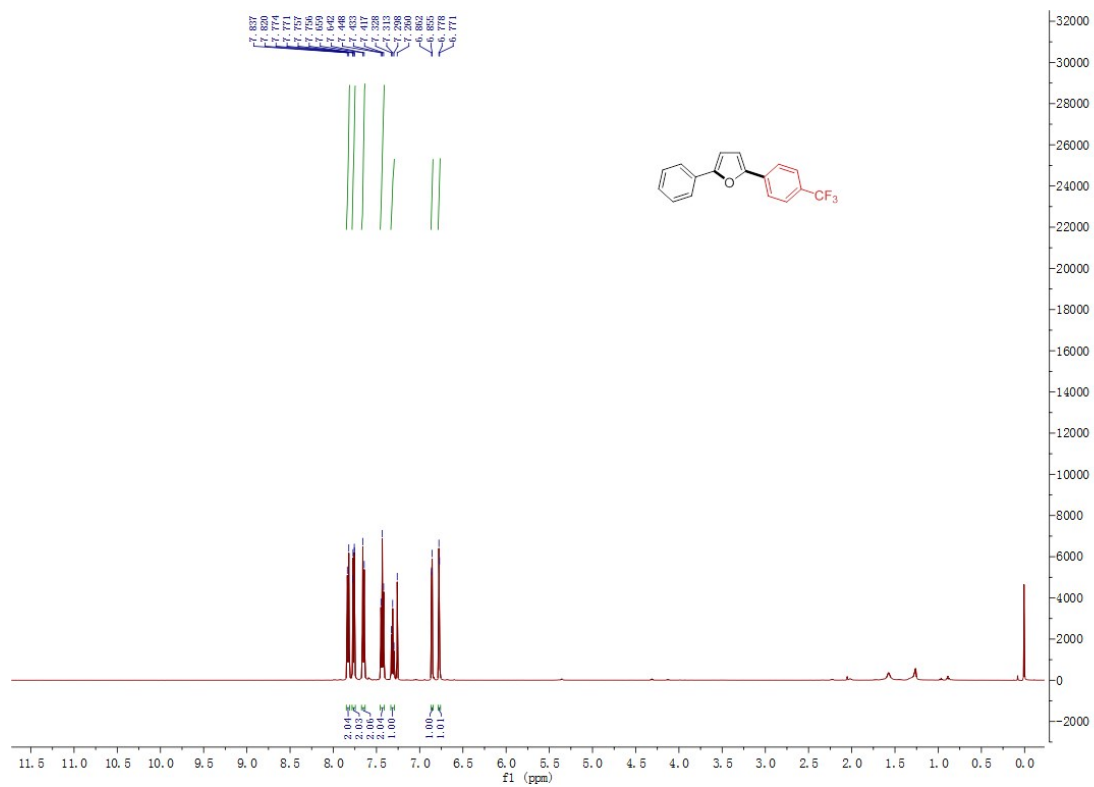

$^1\text{H}$  NMR (500 MHz,  $\text{CDCl}_3$ ) of compound 3m

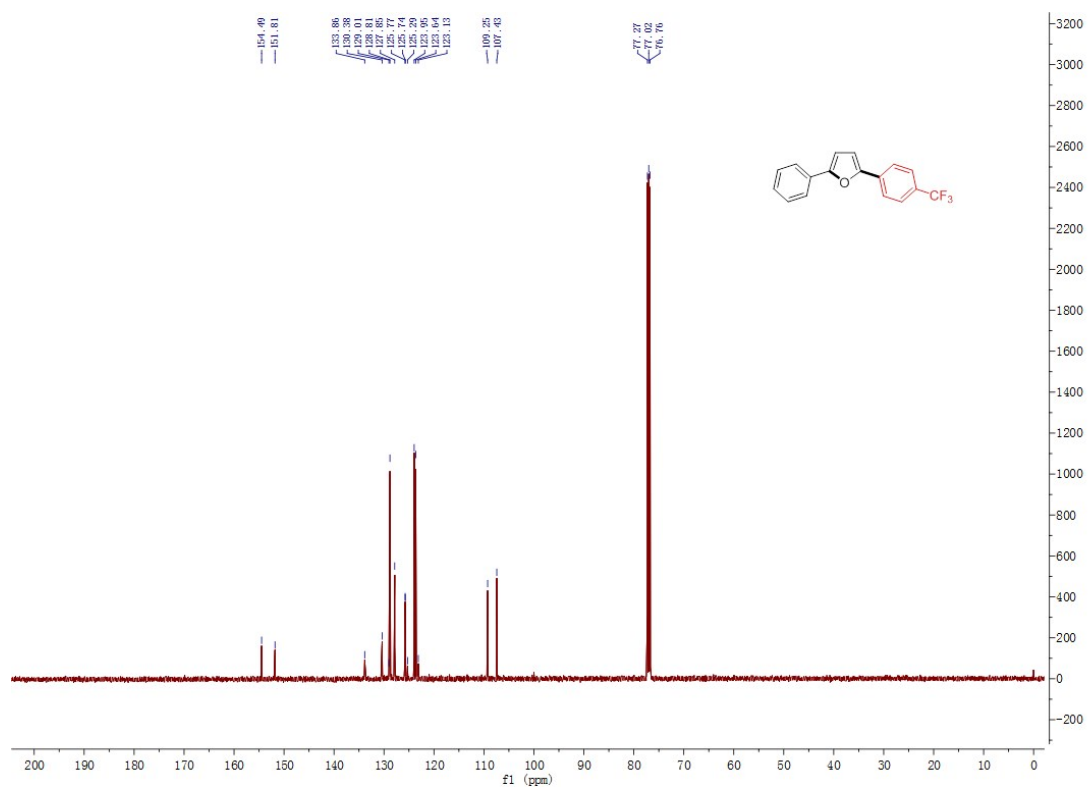

<sup>13</sup>C NMR (125 MHz, CDCl<sub>3</sub>) of compound **3m**

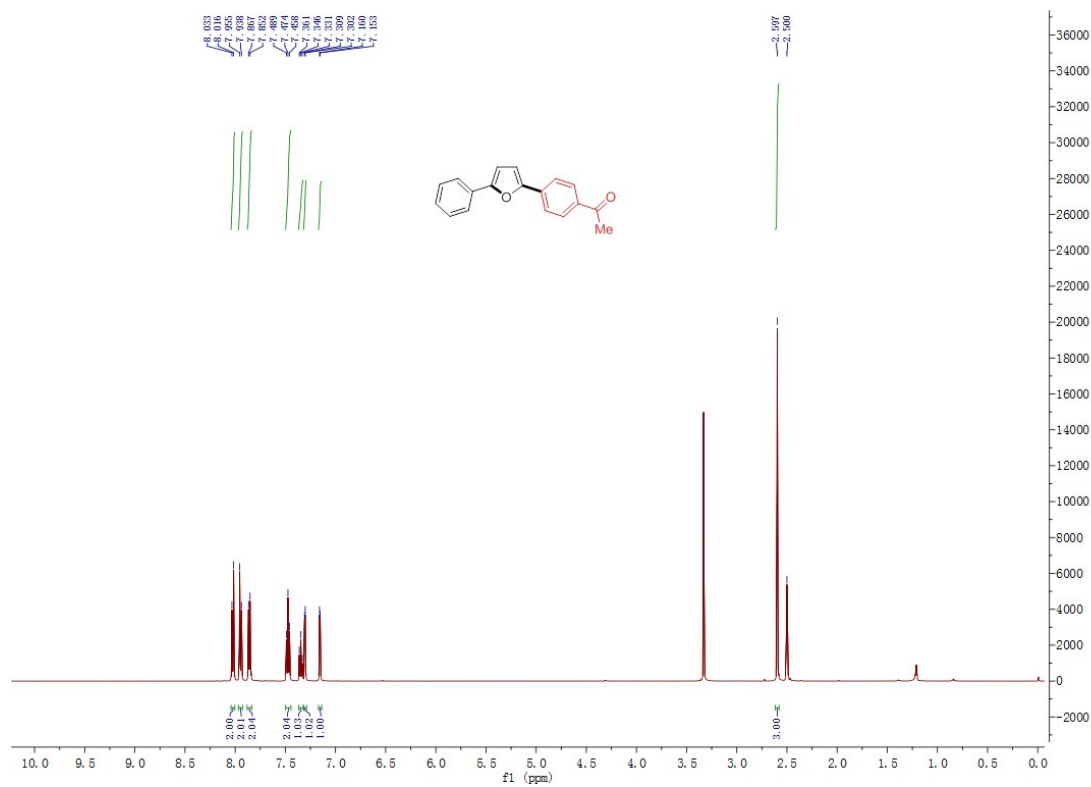

<sup>1</sup>H NMR (500 MHz, DMSO-*d*<sub>6</sub>) of compound **3n**

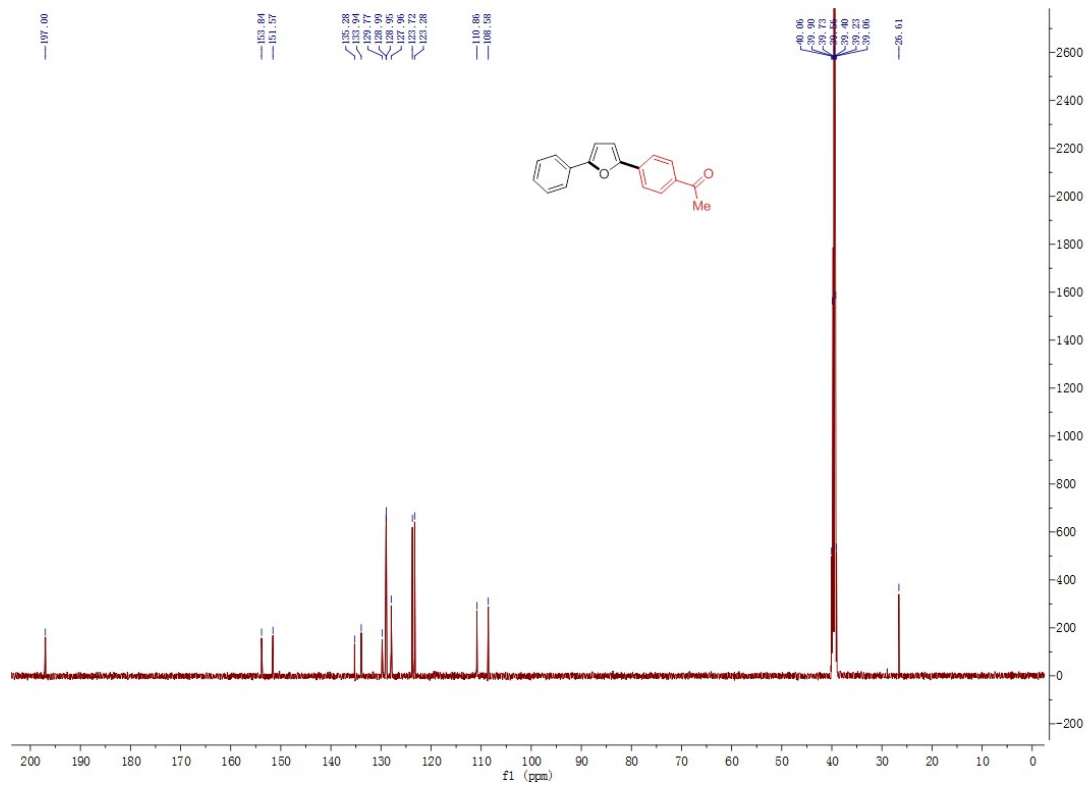

$^{13}\text{C}$  NMR (125 MHz, DMSO- $d_6$ ) of compound **3n**

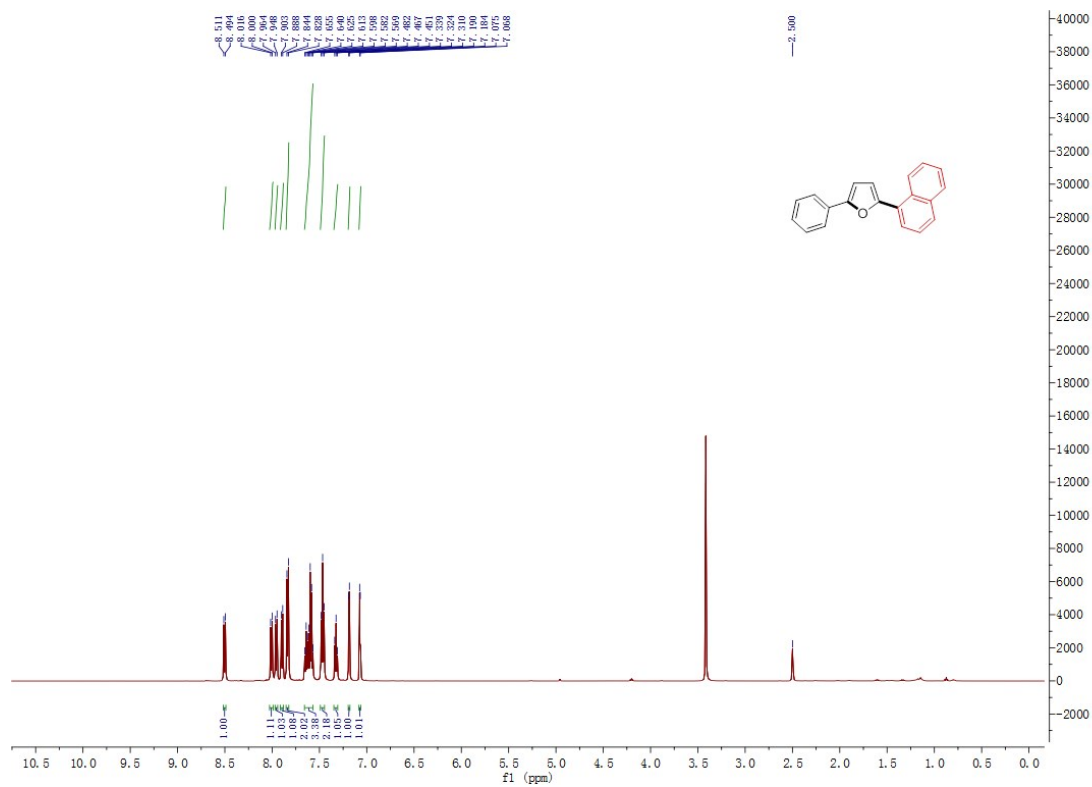

$^1\text{H}$  NMR (500 MHz, DMSO- $d_6$ ) of compound **3o**

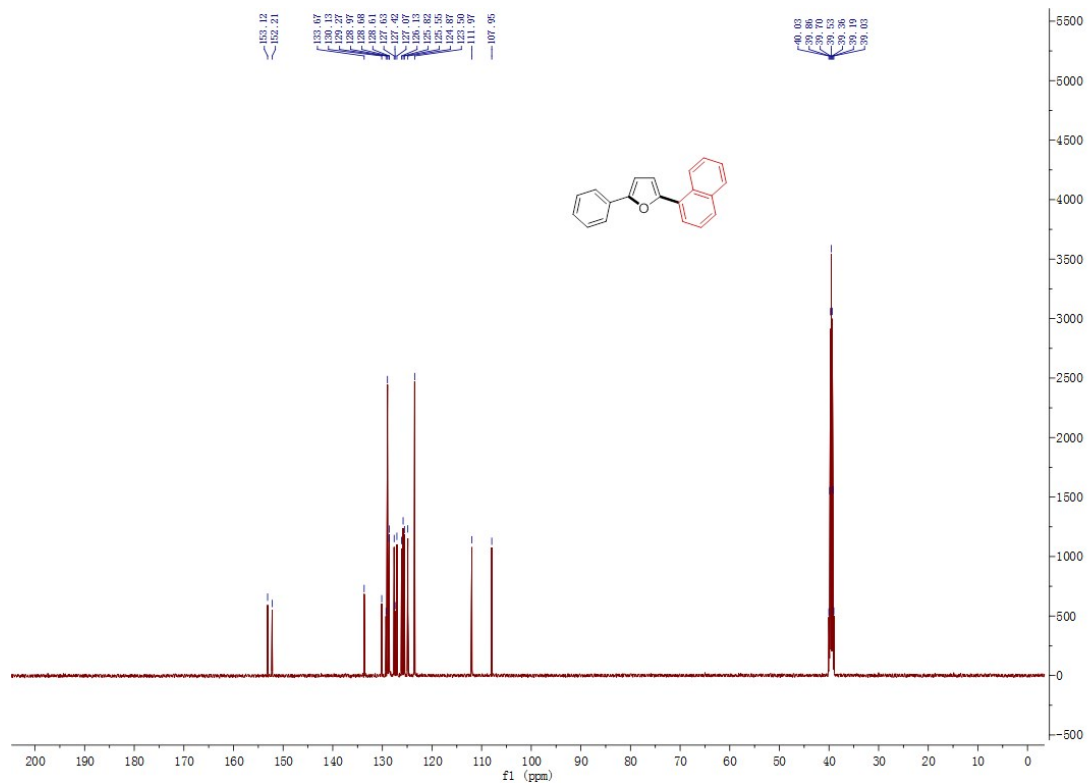

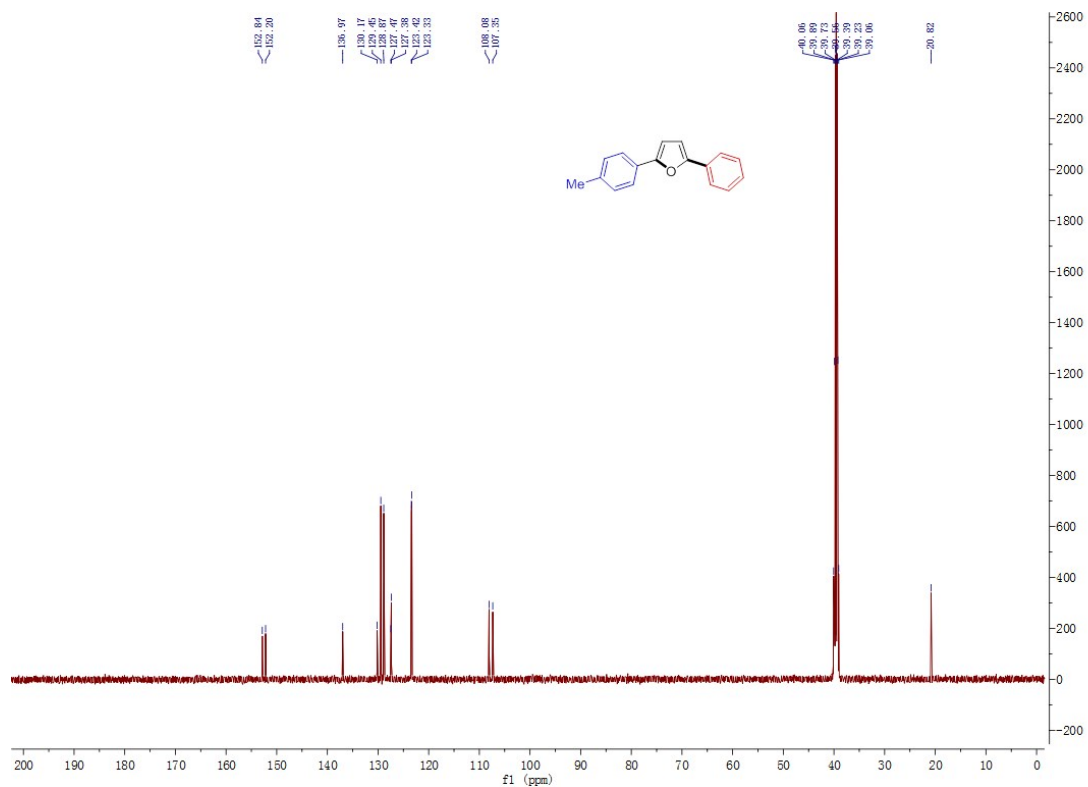

$^{13}\text{C}$  NMR (125 MHz,  $\text{DMSO-}d_6$ ) of compound **3p**

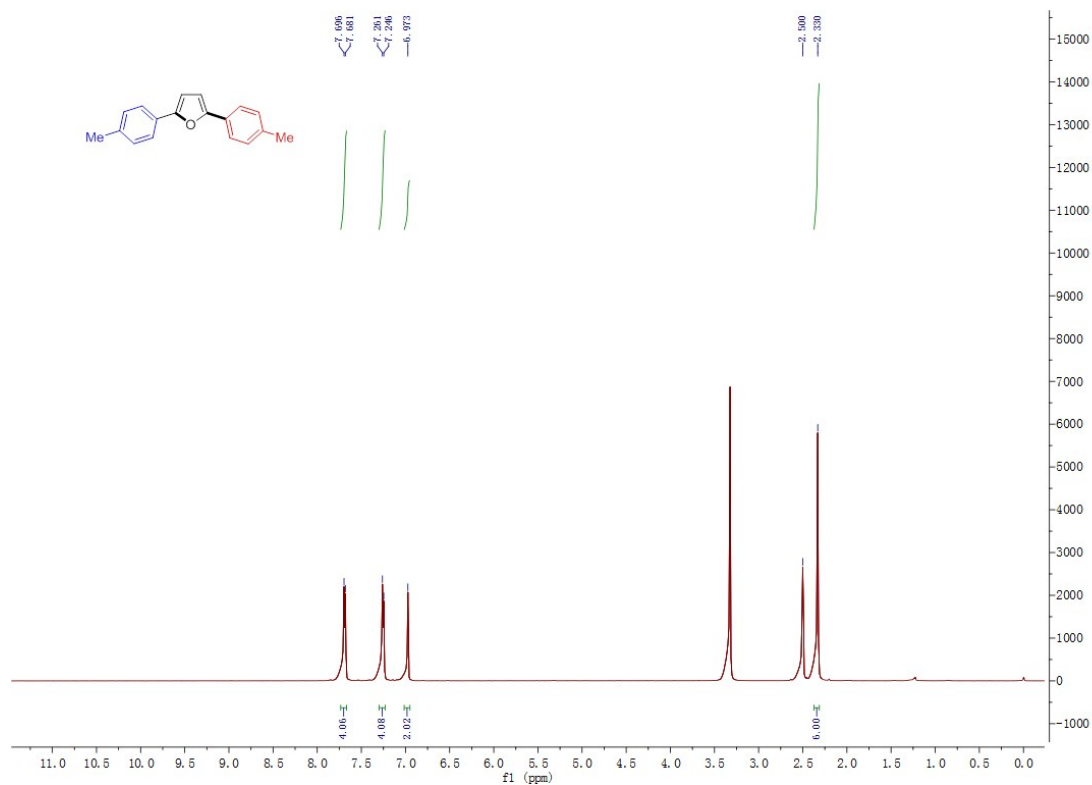

$^1\text{H}$  NMR (500 MHz,  $\text{DMSO-}d_6$ ) of compound **3q**



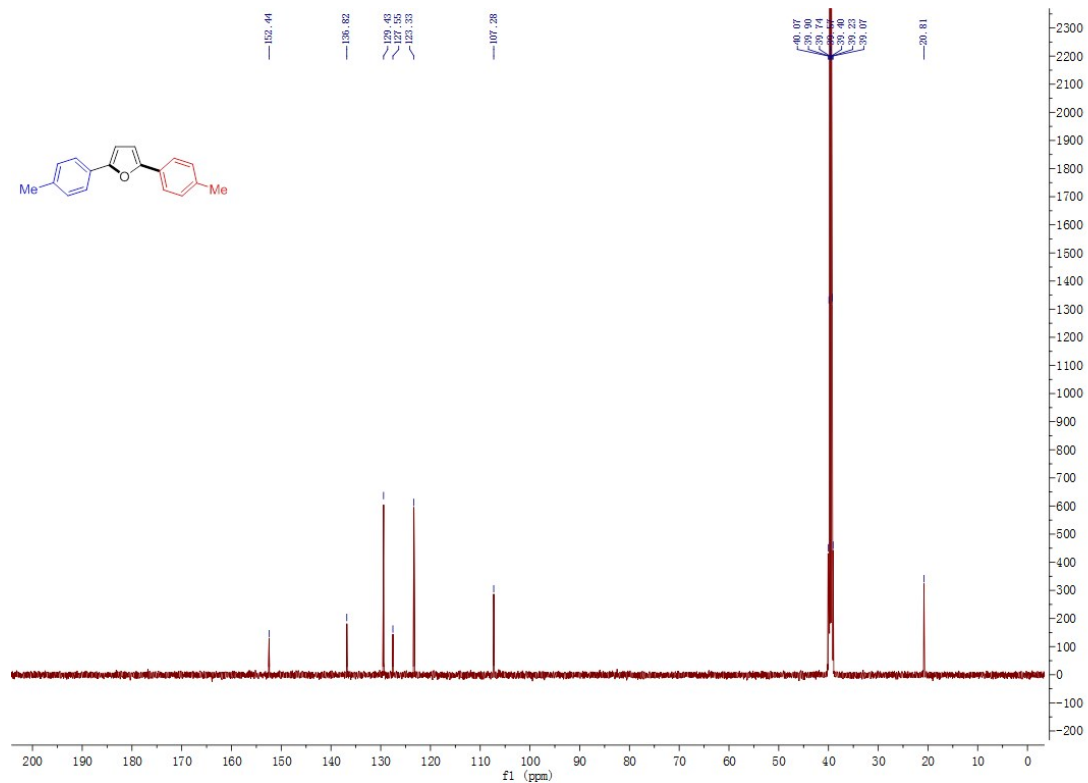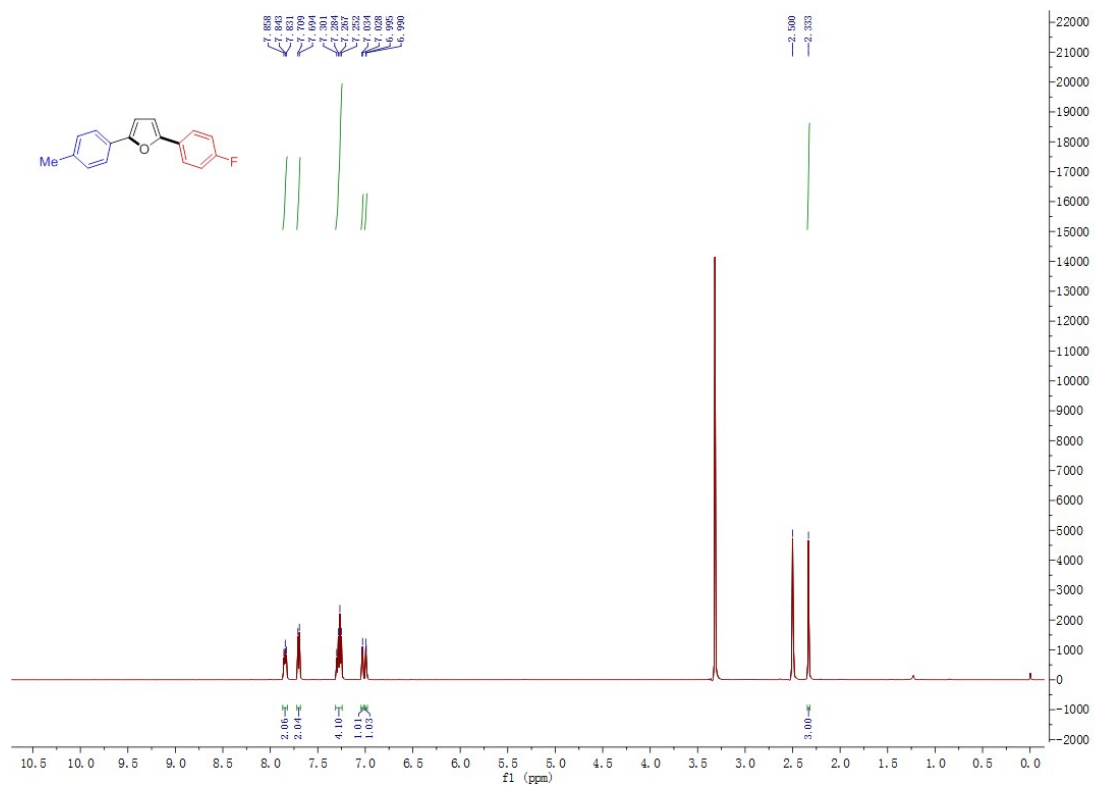

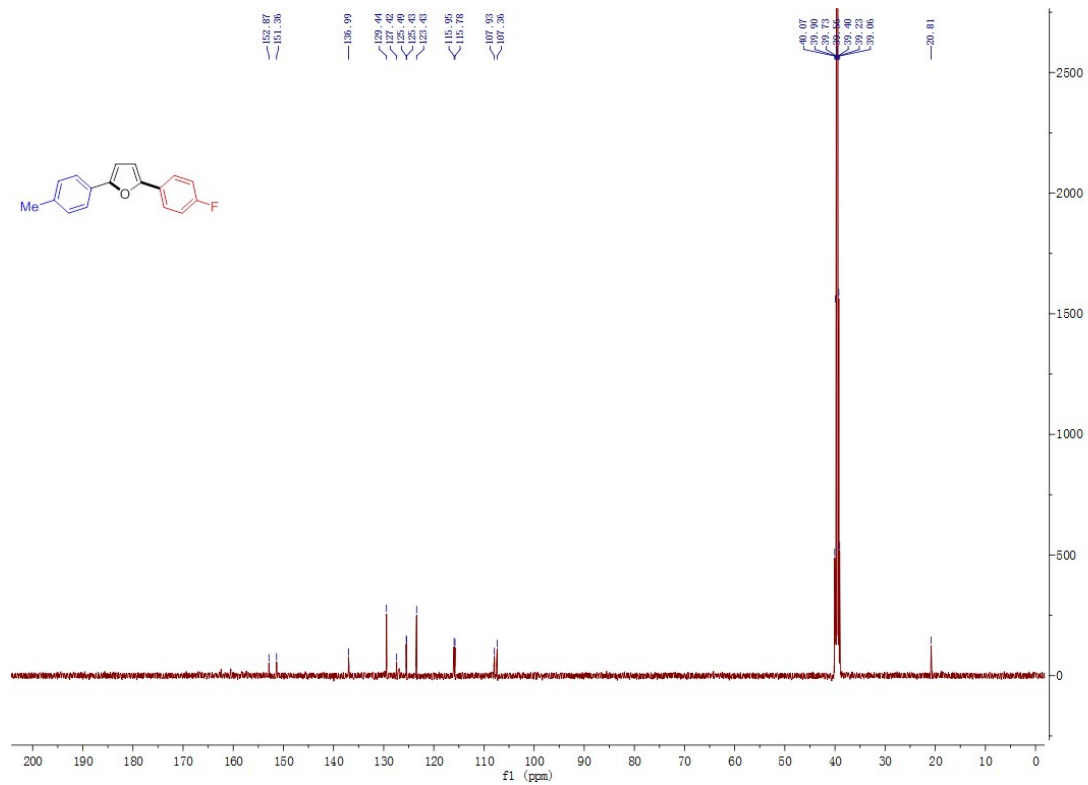

<sup>13</sup>C NMR (125 MHz, DMSO-*d*<sub>6</sub>) of compound 3r

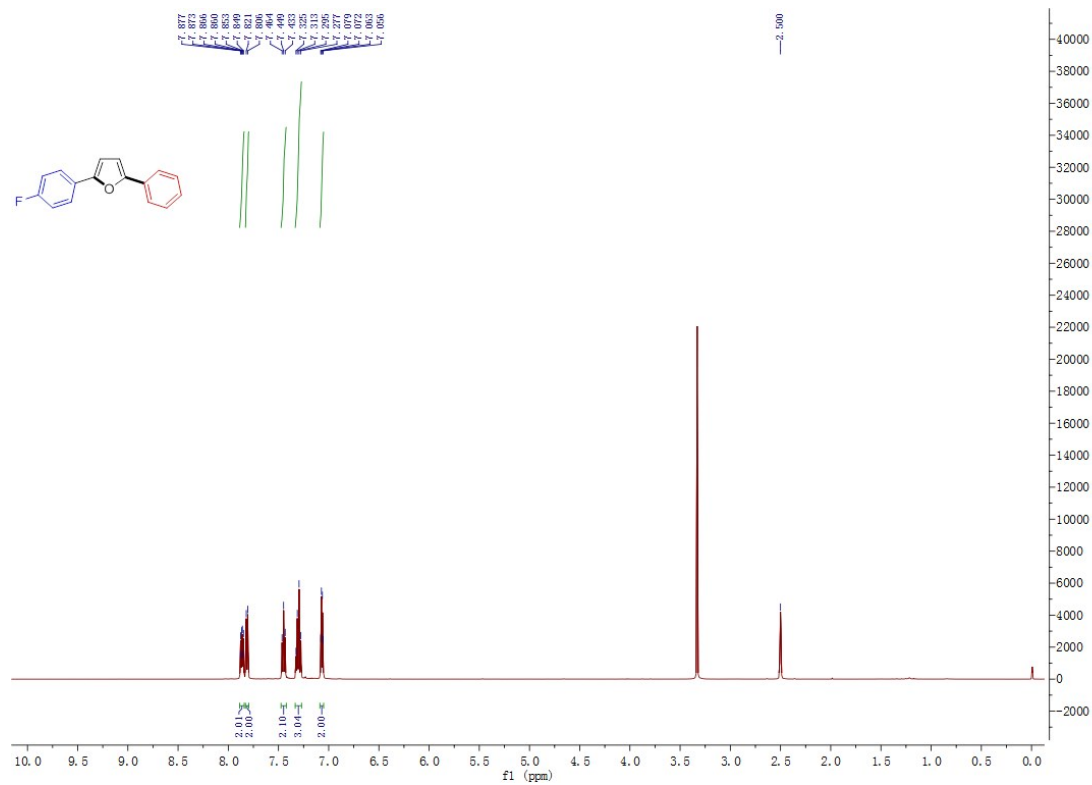

<sup>1</sup>H NMR (500 MHz, DMSO-*d*<sub>6</sub>) of compound 3s



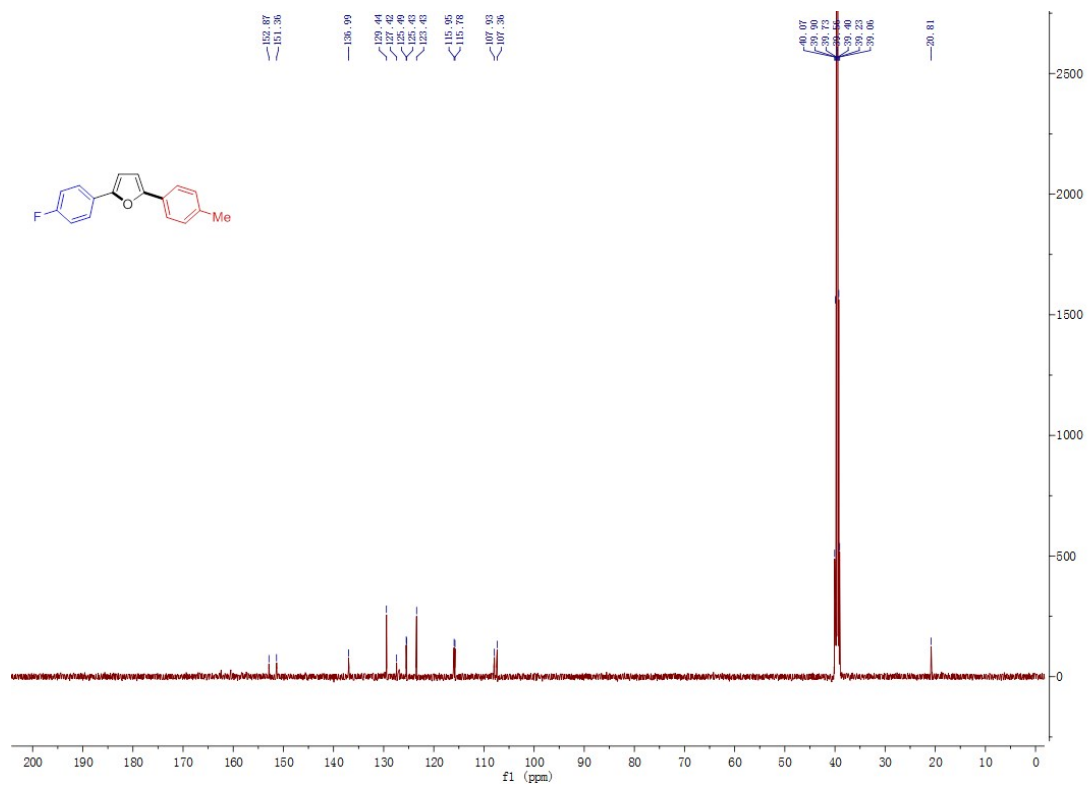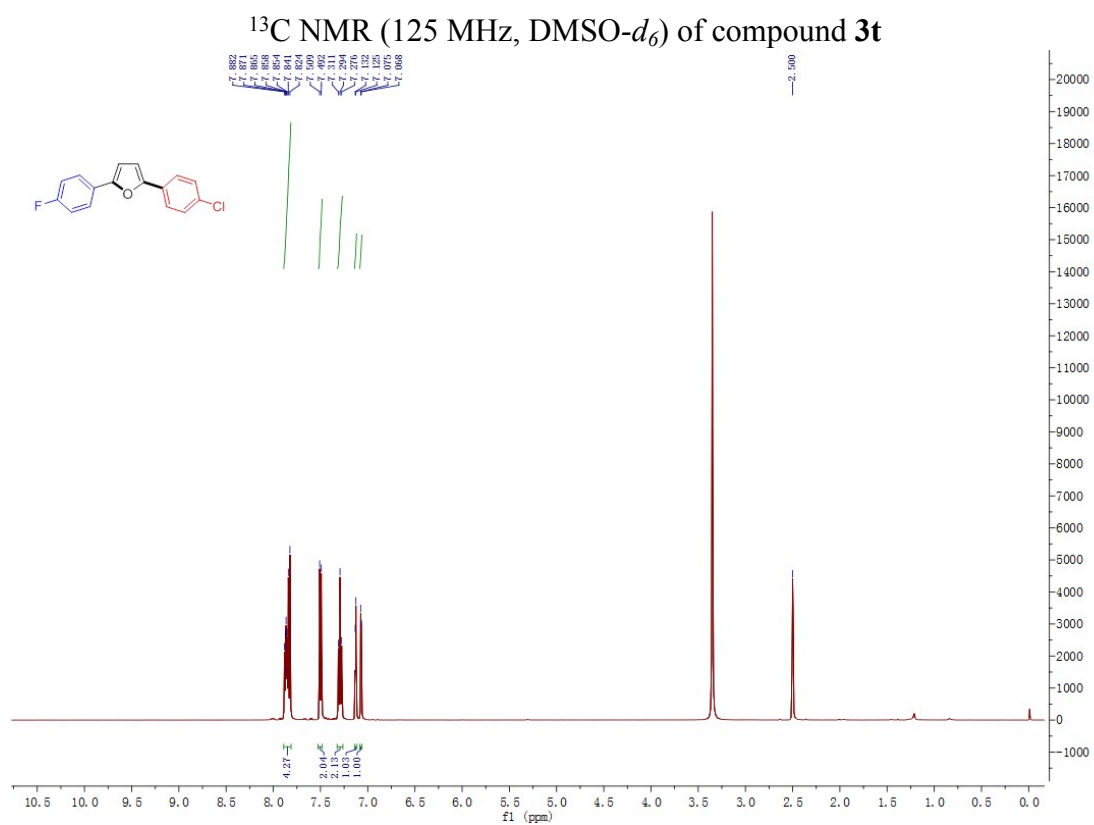

$^1\text{H}$  NMR (500 MHz,  $\text{DMSO-}d_6$ ) of compound **3u**

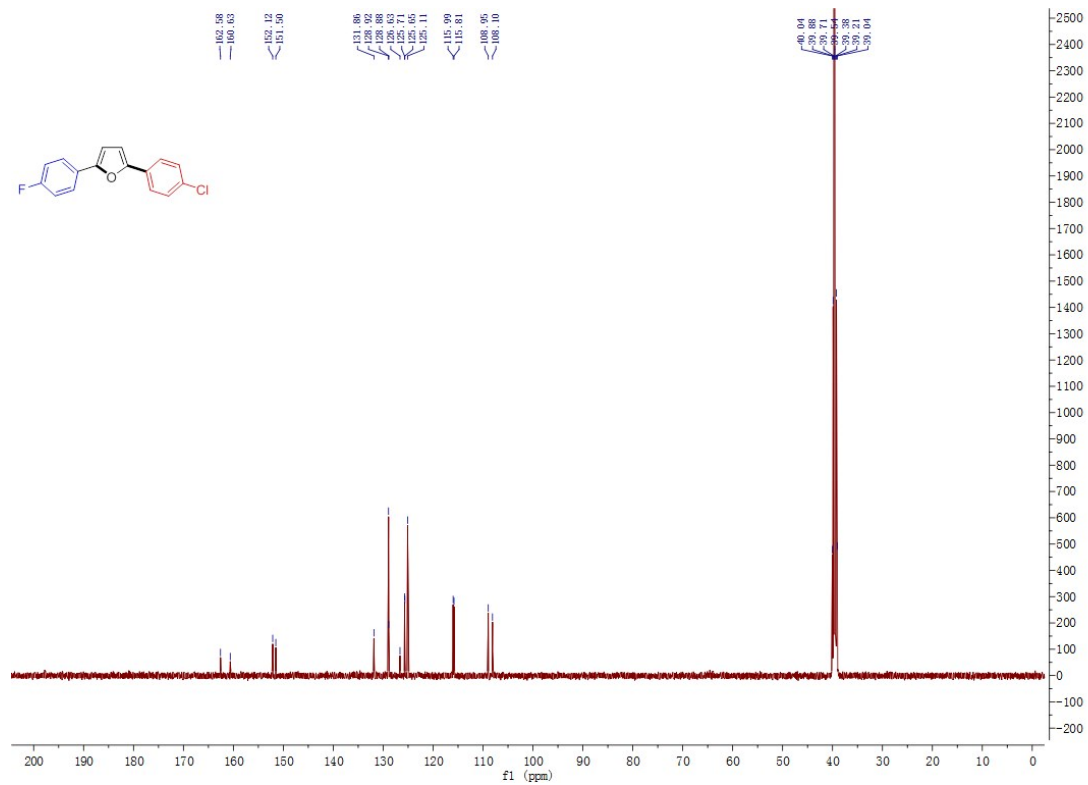

<sup>13</sup>C NMR (125 MHz, DMSO-*d*<sub>6</sub>) of compound **3u**

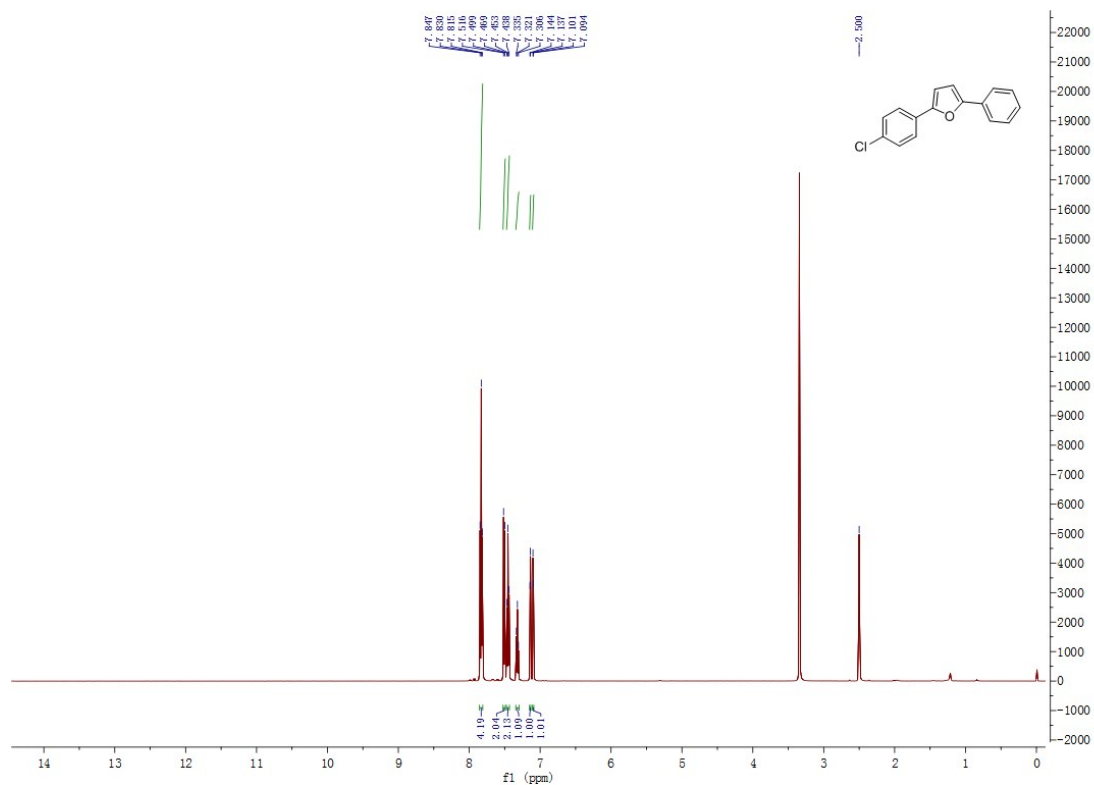

<sup>1</sup>H NMR (500 MHz, DMSO-*d*<sub>6</sub>) of compound **3v**

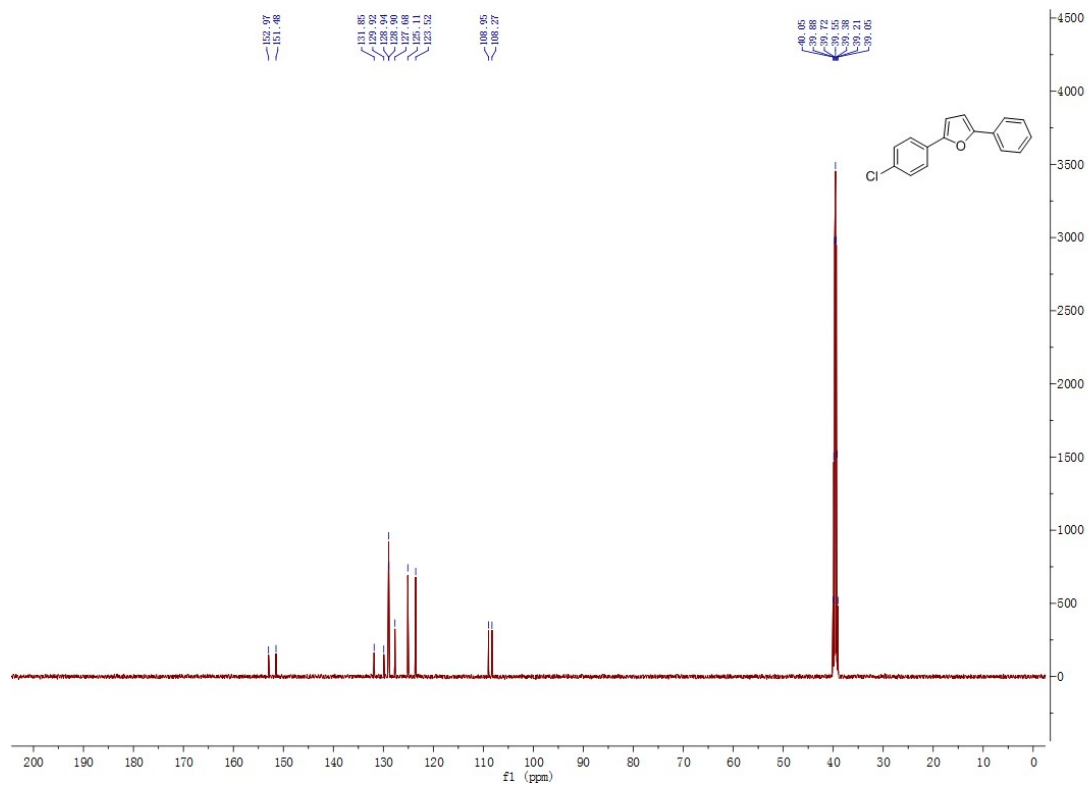

<sup>13</sup>C NMR (125 MHz, DMSO-*d*<sub>6</sub>) of compound **3v**

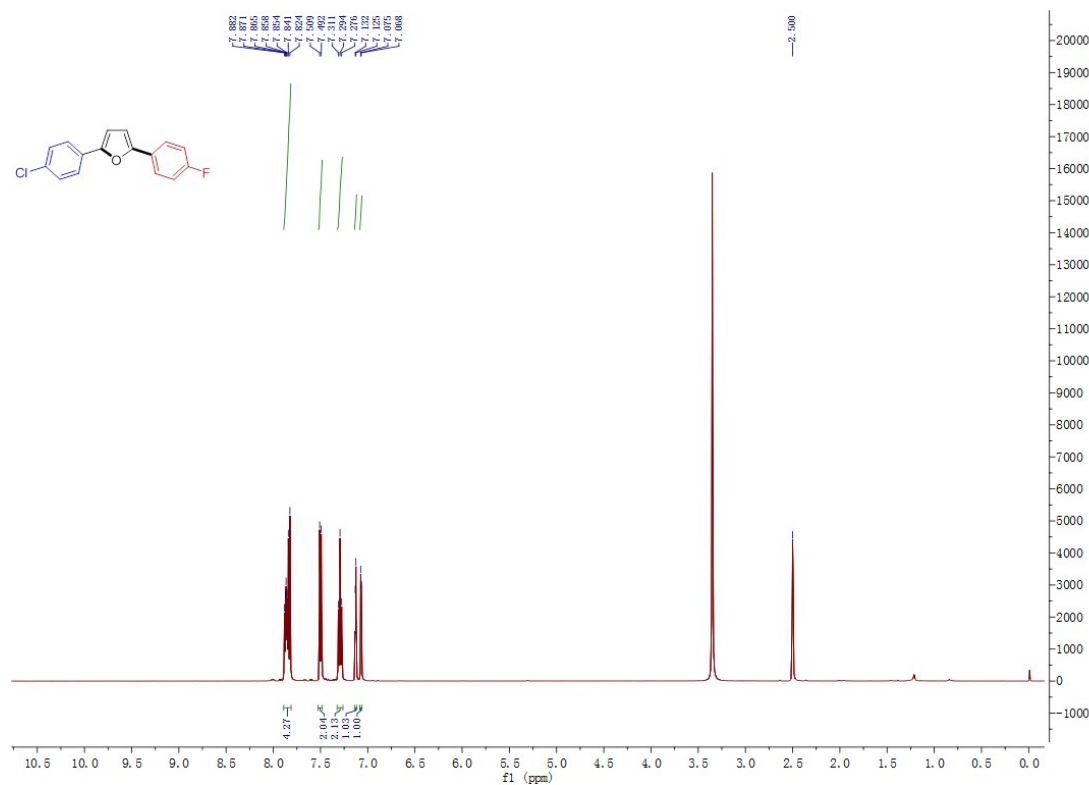

<sup>1</sup>H NMR (500 MHz, DMSO-*d*<sub>6</sub>) of compound **3w**

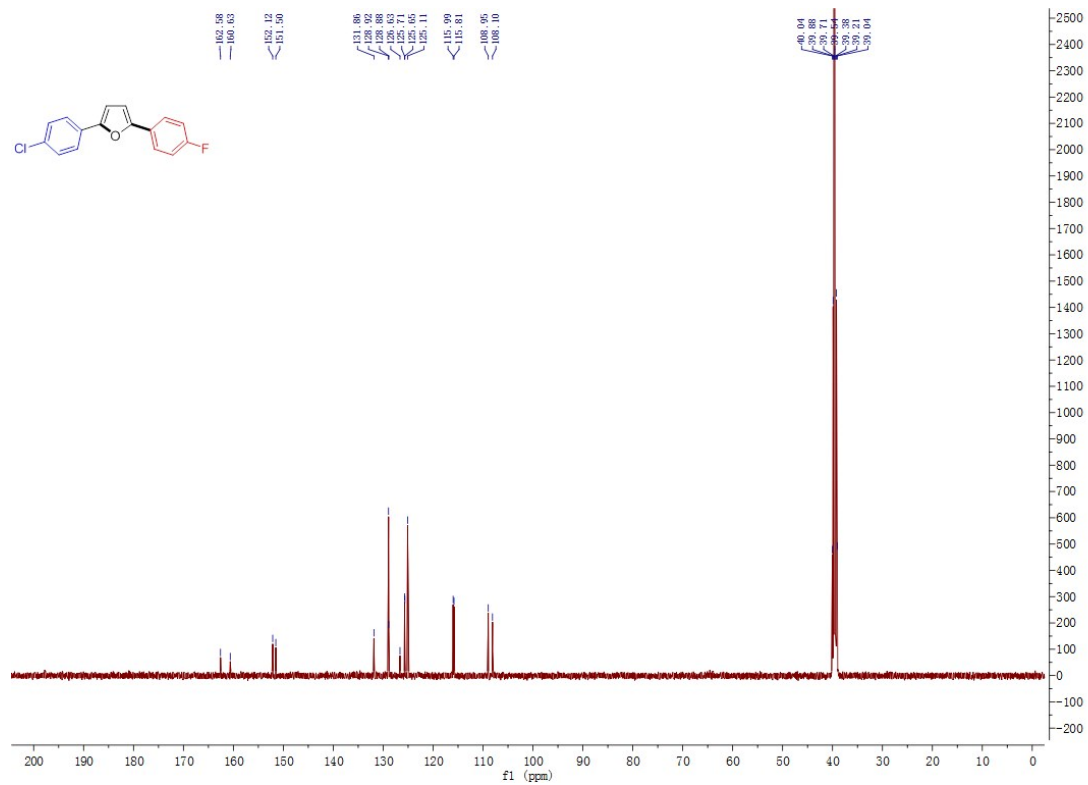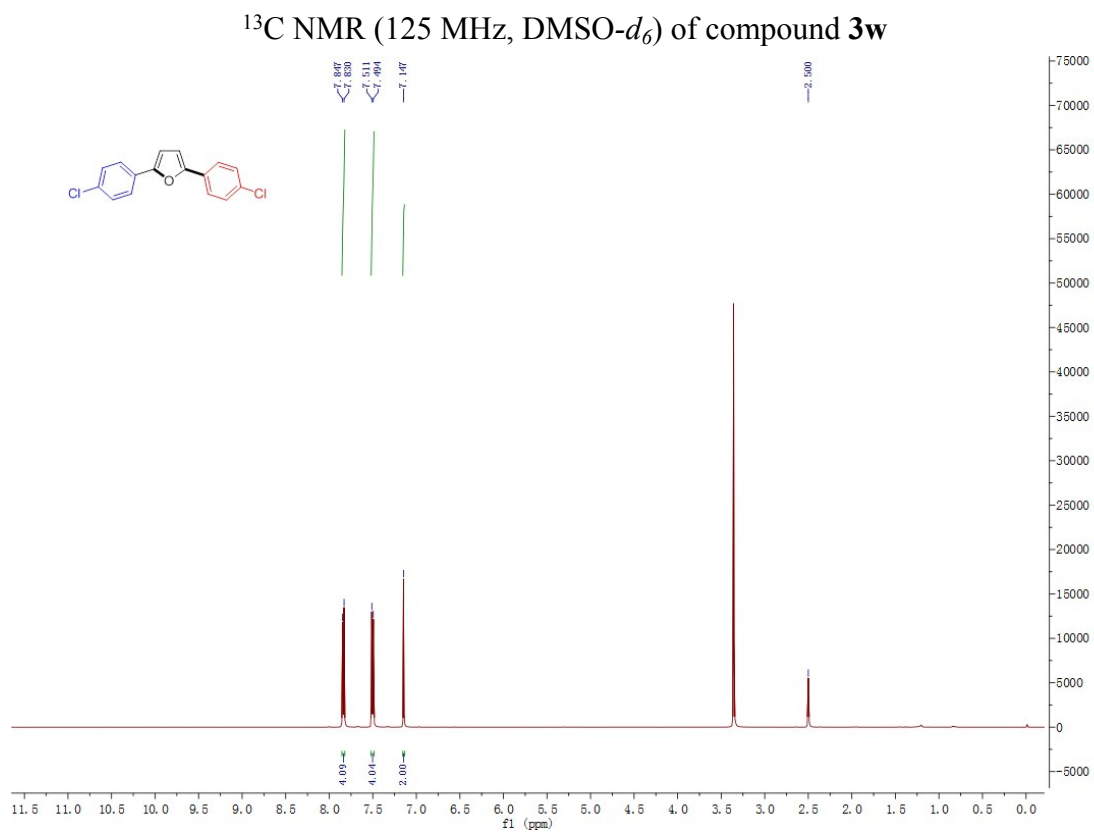

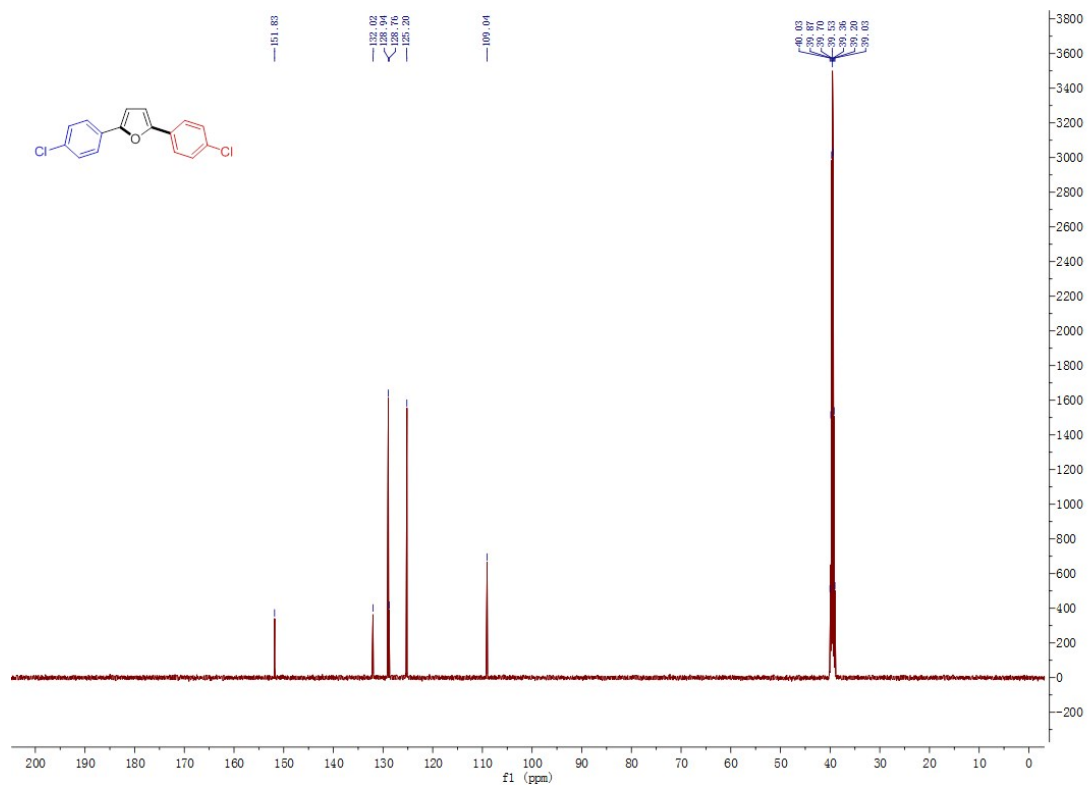

$^{13}\text{C}$  NMR (125 MHz,  $\text{DMSO-}d_6$ ) of compound **3x**

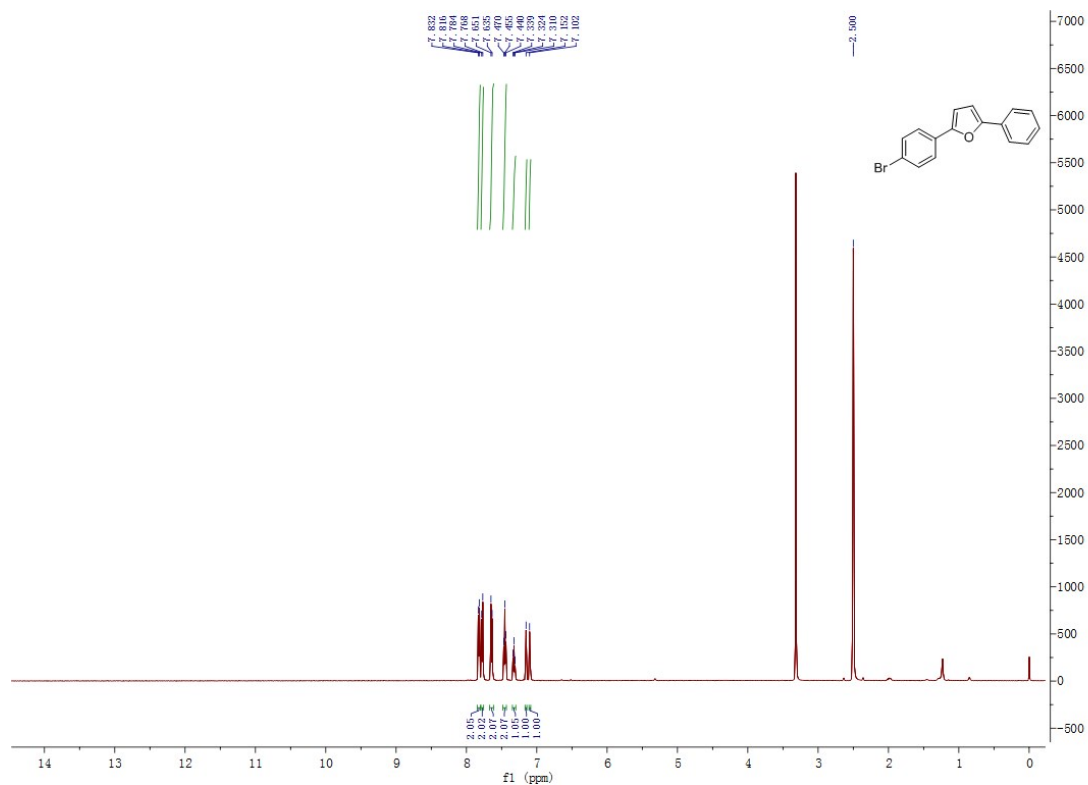

$^1\text{H}$  NMR (500 MHz,  $\text{DMSO-}d_6$ ) of compound **3y**



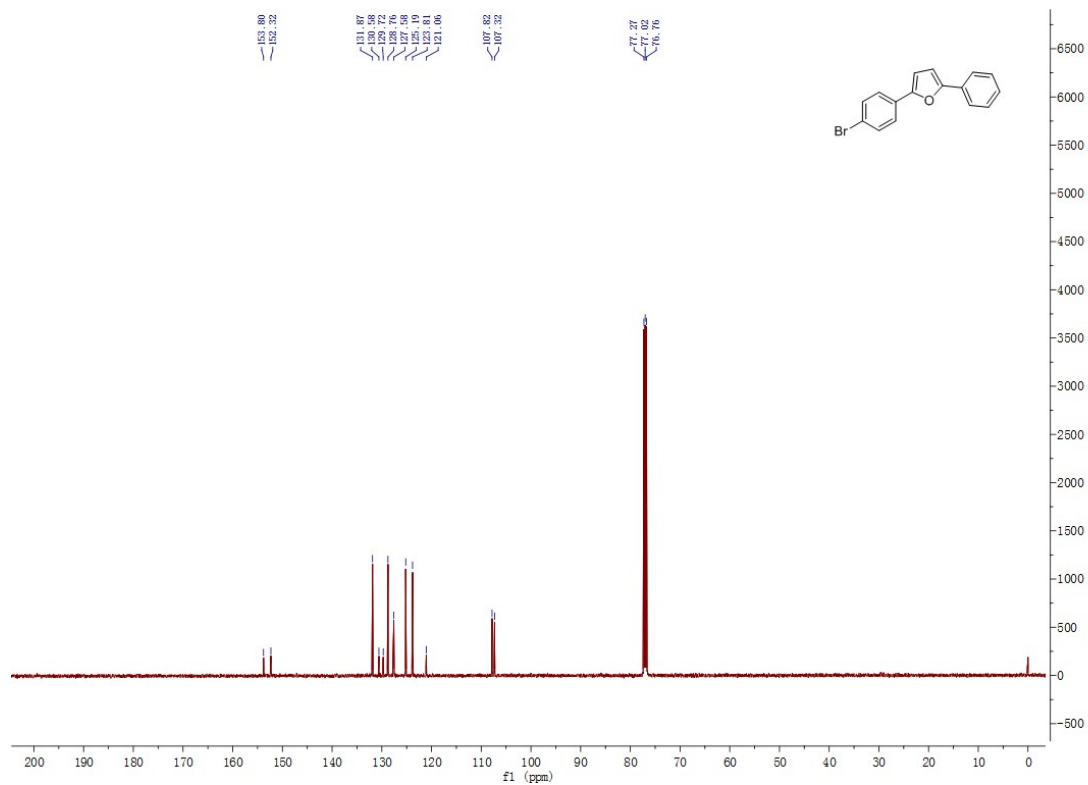

$^{13}\text{C}$  NMR (125 MHz,  $\text{CDCl}_3$ ) of compound **3y**

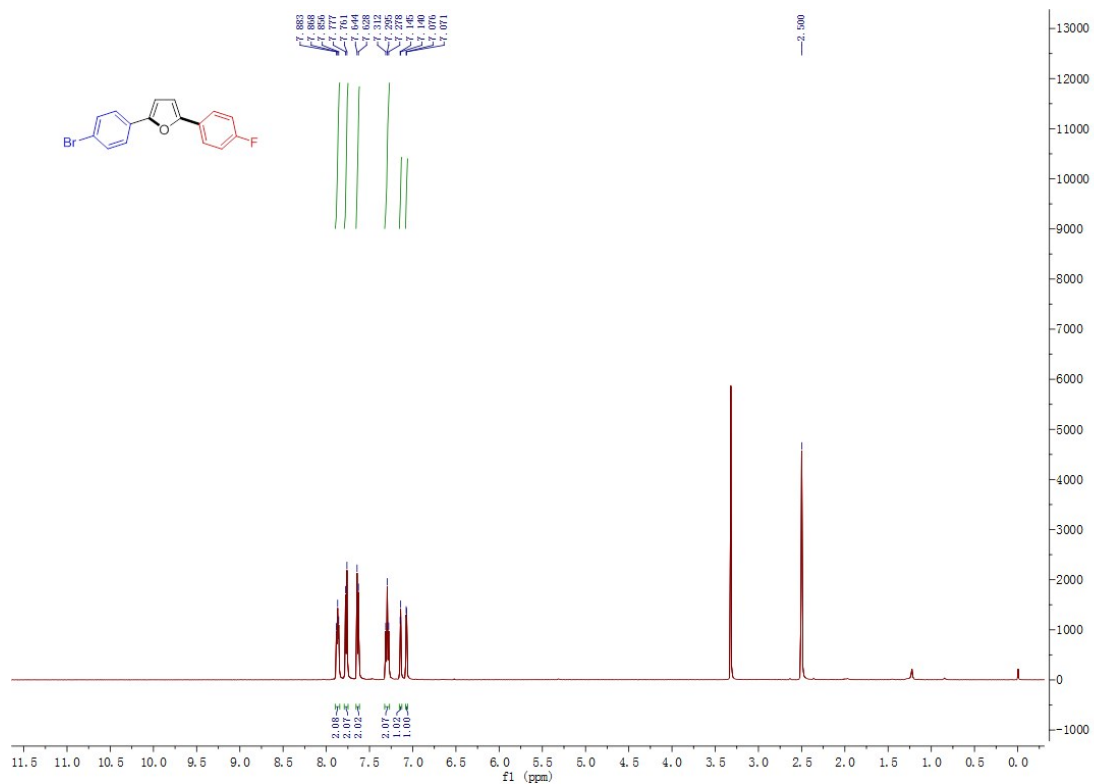

$^1\text{H}$  NMR (500 MHz,  $\text{DMSO}-d_6$ ) of compound **3z**

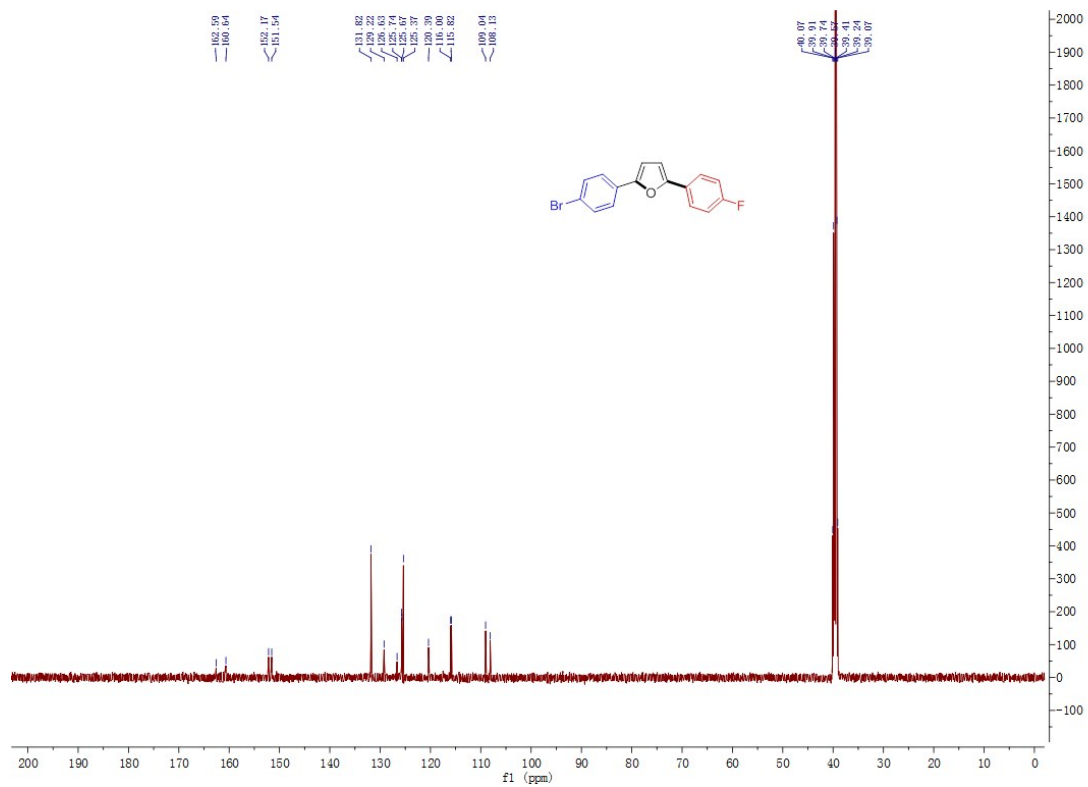

<sup>13</sup>C NMR (125 MHz, DMSO-*d*<sub>6</sub>) of compound 3z

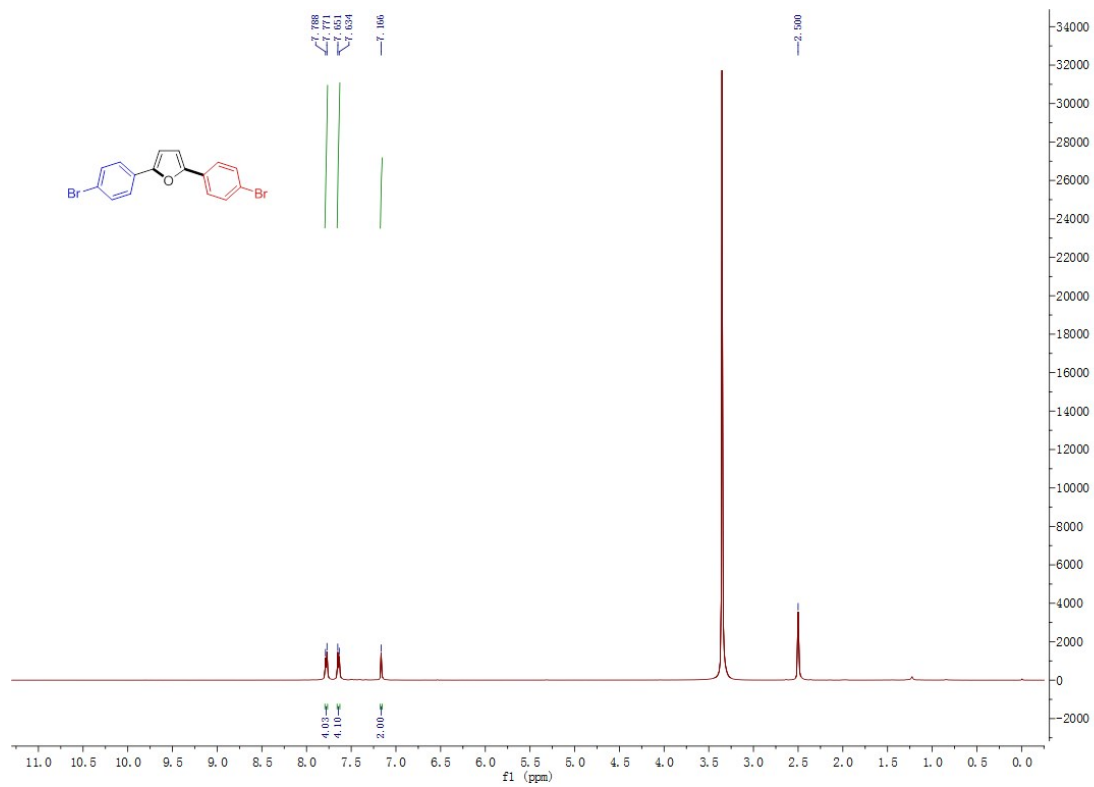

<sup>1</sup>H NMR (500 MHz, DMSO-*d*<sub>6</sub>) of compound 3aa



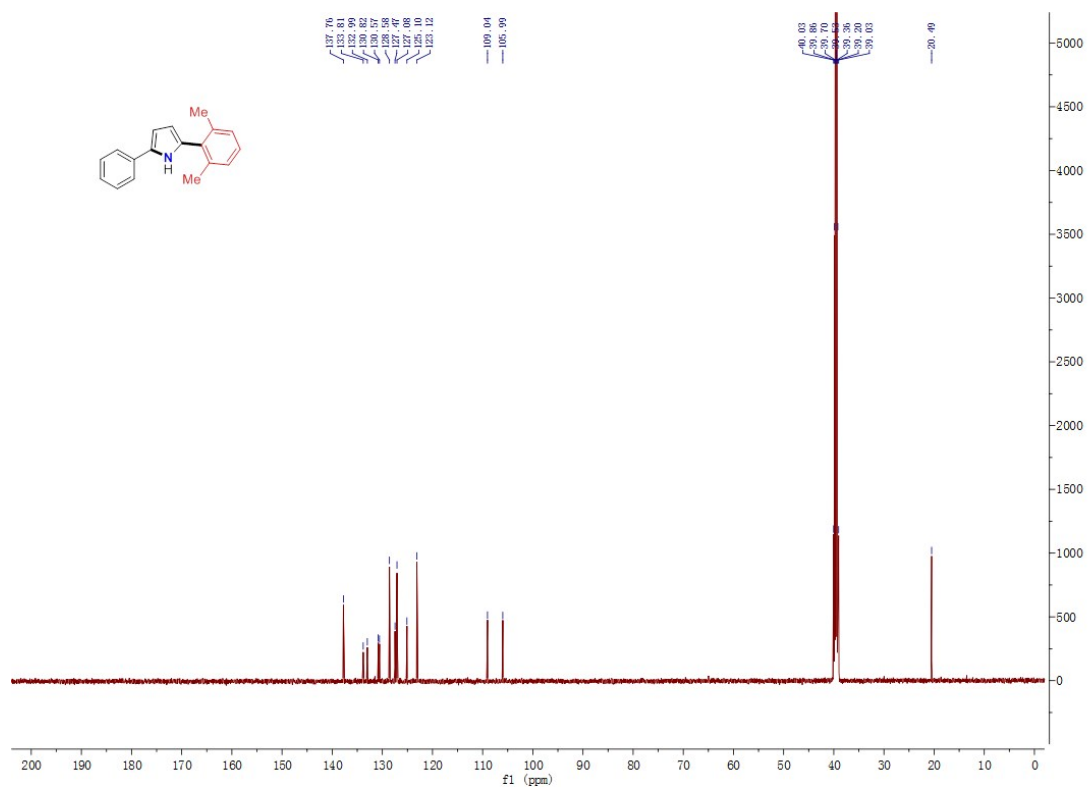

$^{13}\text{C}$  NMR (125 MHz,  $\text{DMSO-}d_6$ ) of compound **4a**

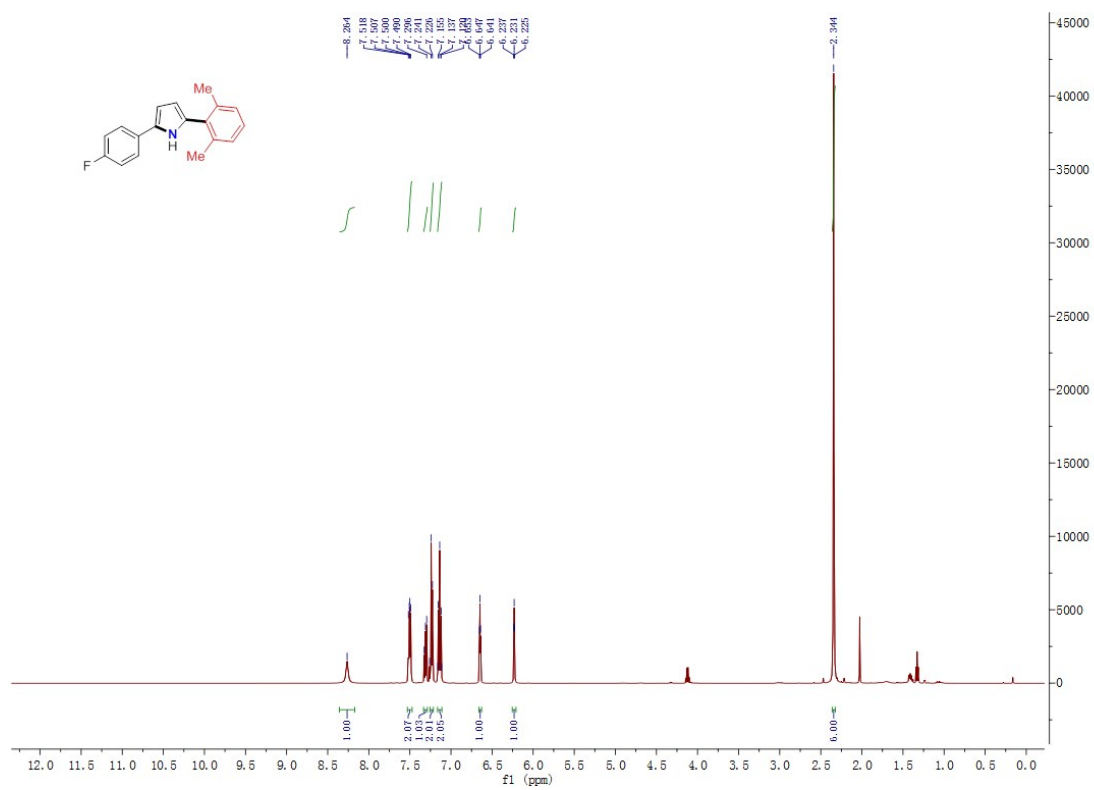

$^1\text{H}$  NMR (500 MHz,  $\text{CDCl}_3$ ) of compound **4b**

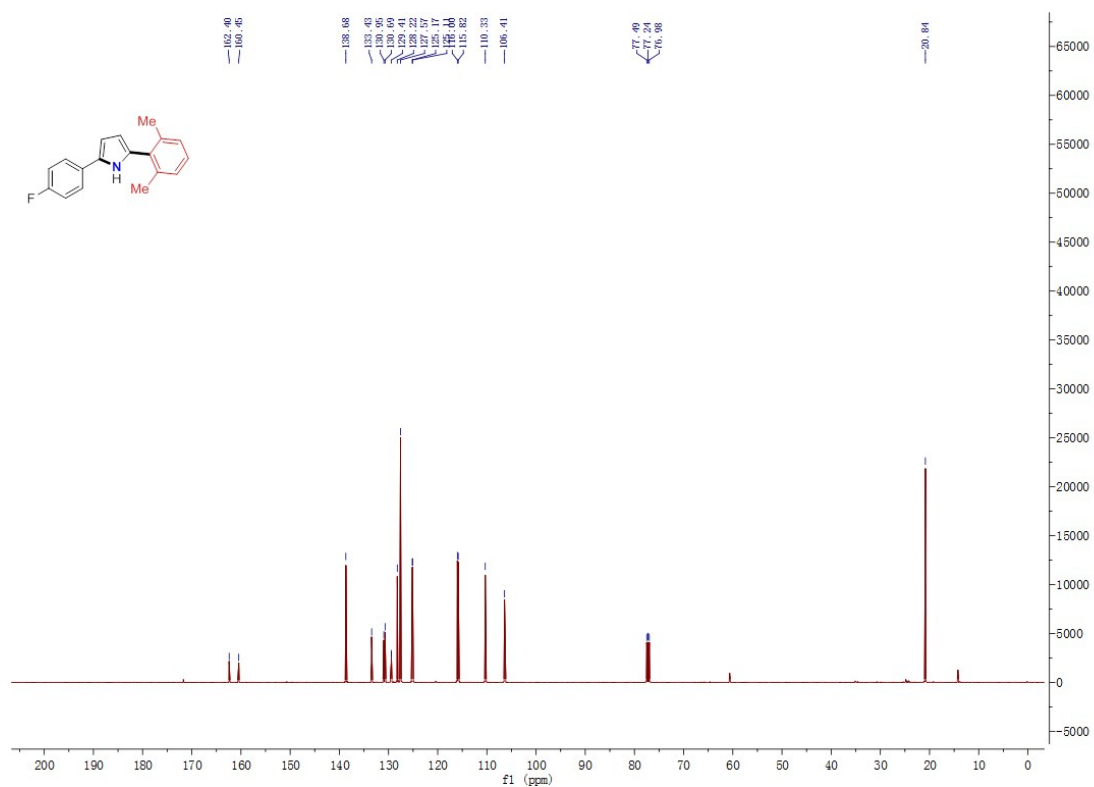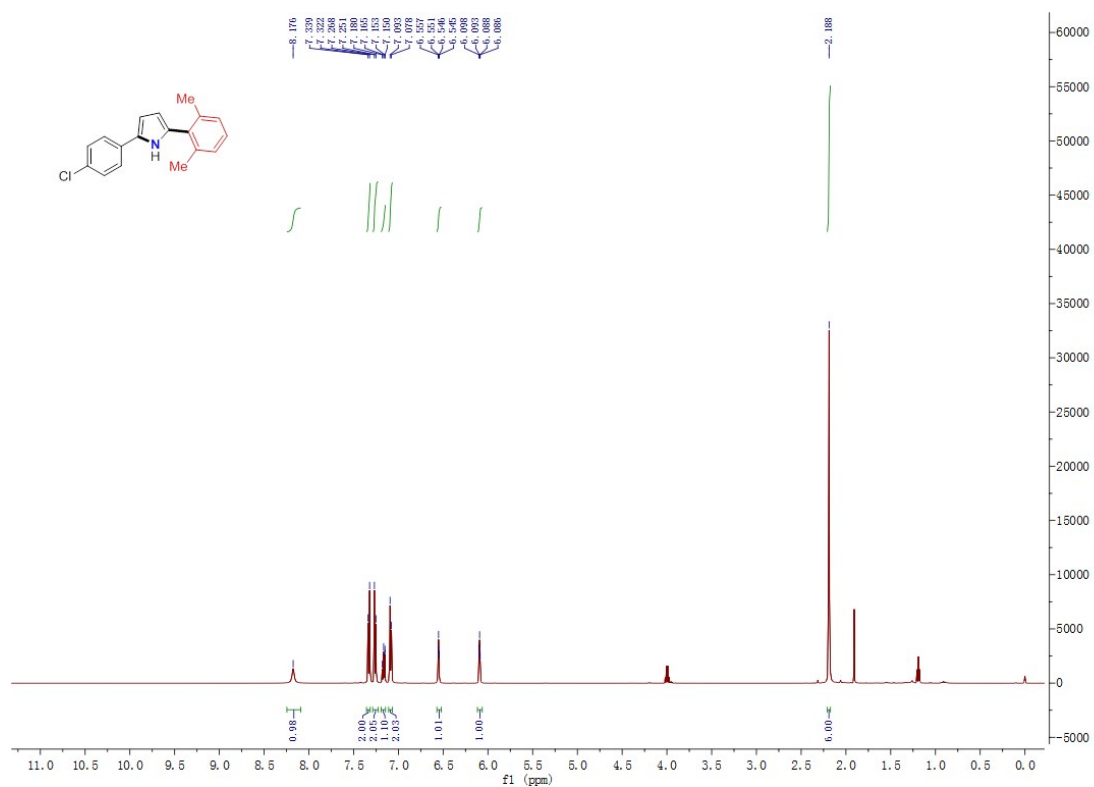

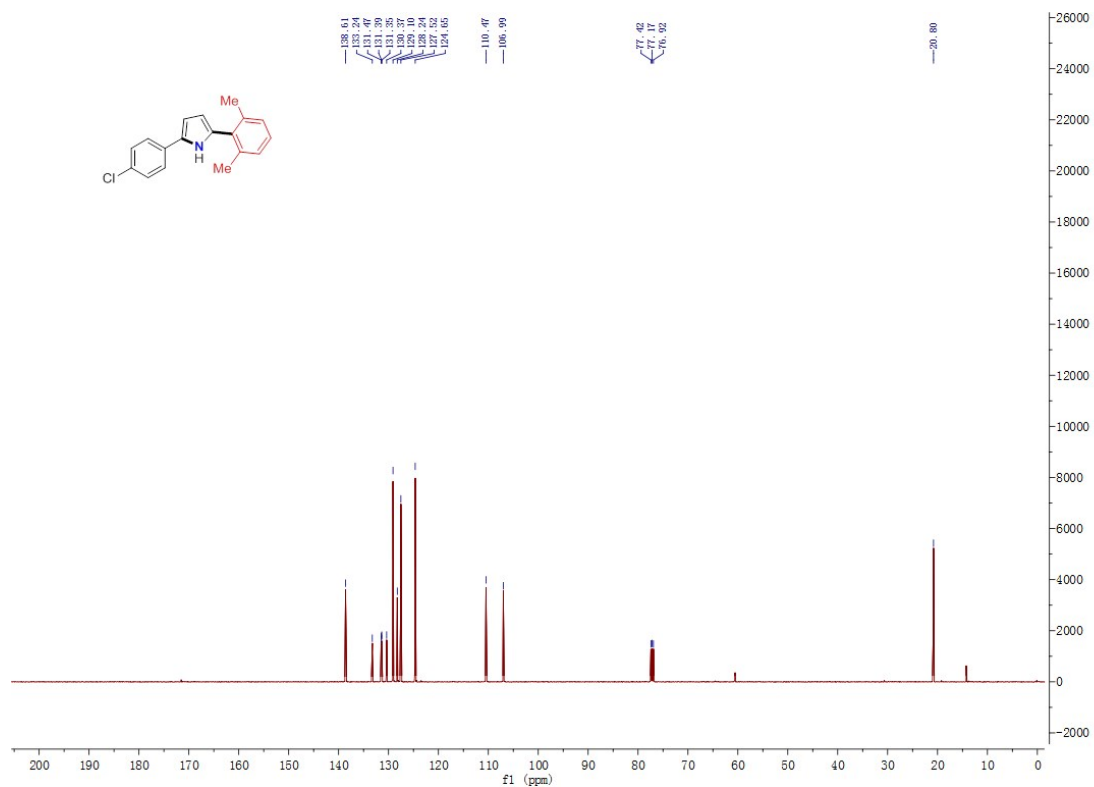

<sup>13</sup>C NMR (125 MHz, CDCl<sub>3</sub>) of compound 4c

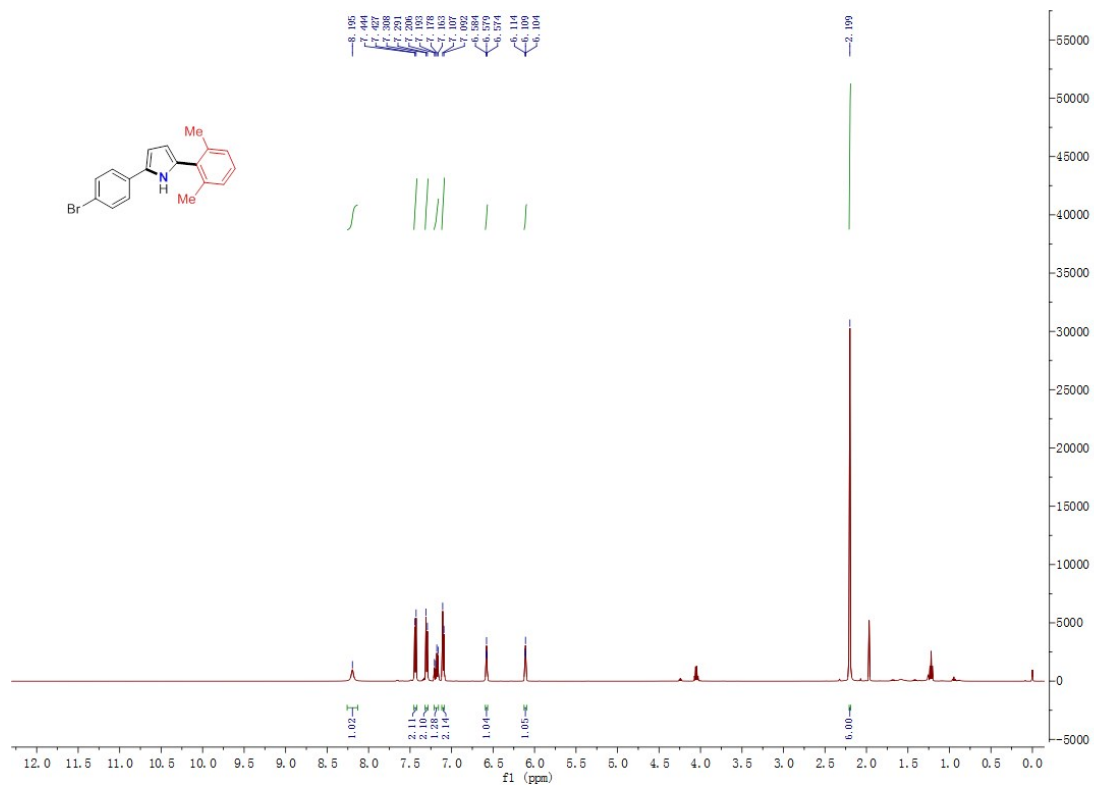

<sup>1</sup>H NMR (500 MHz, CDCl<sub>3</sub>) of compound 4d

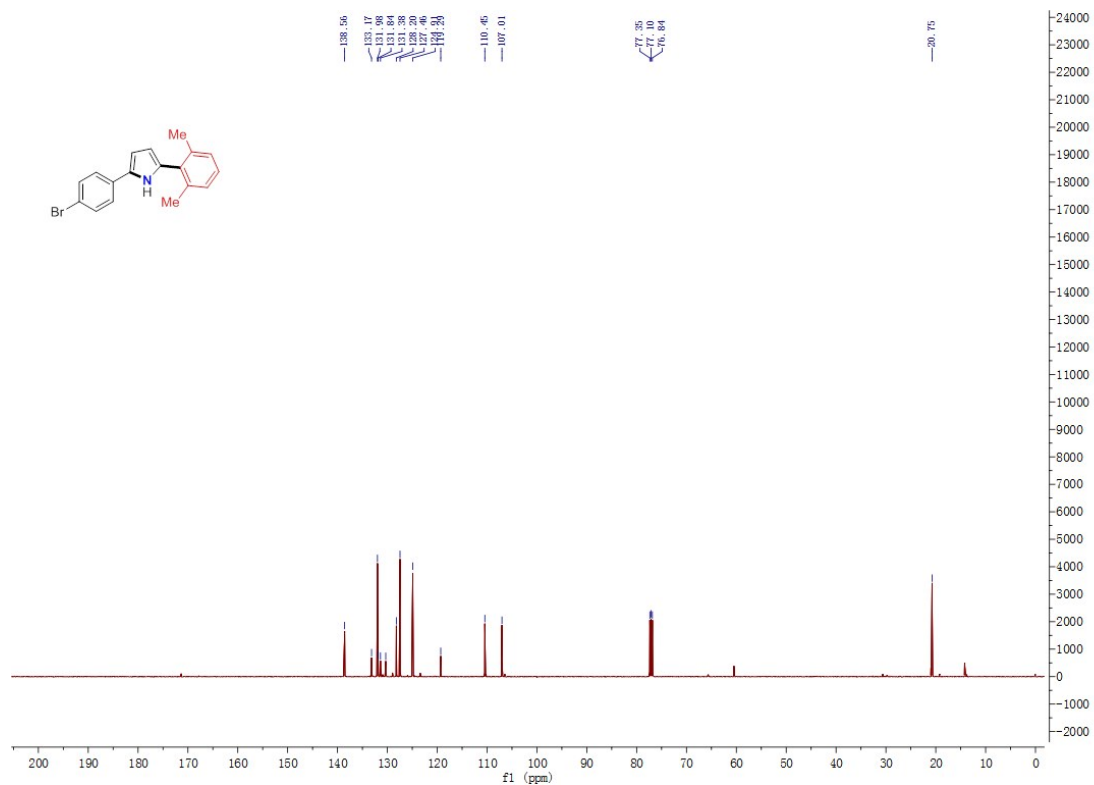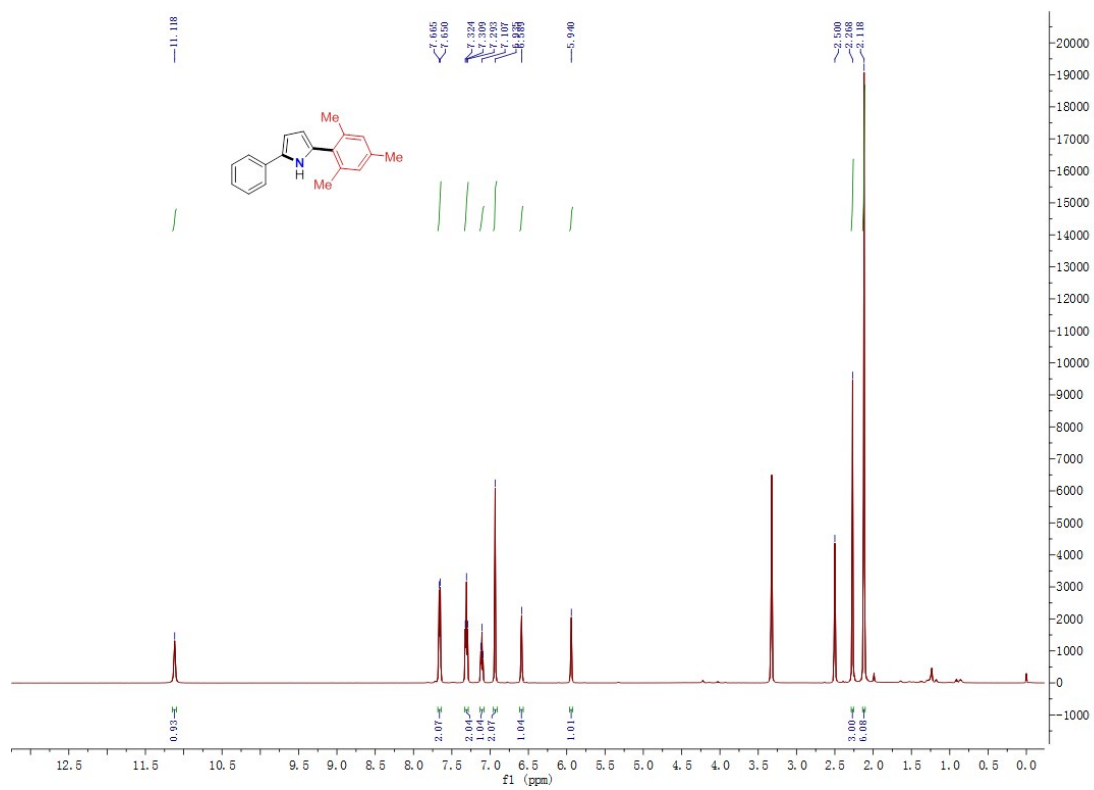

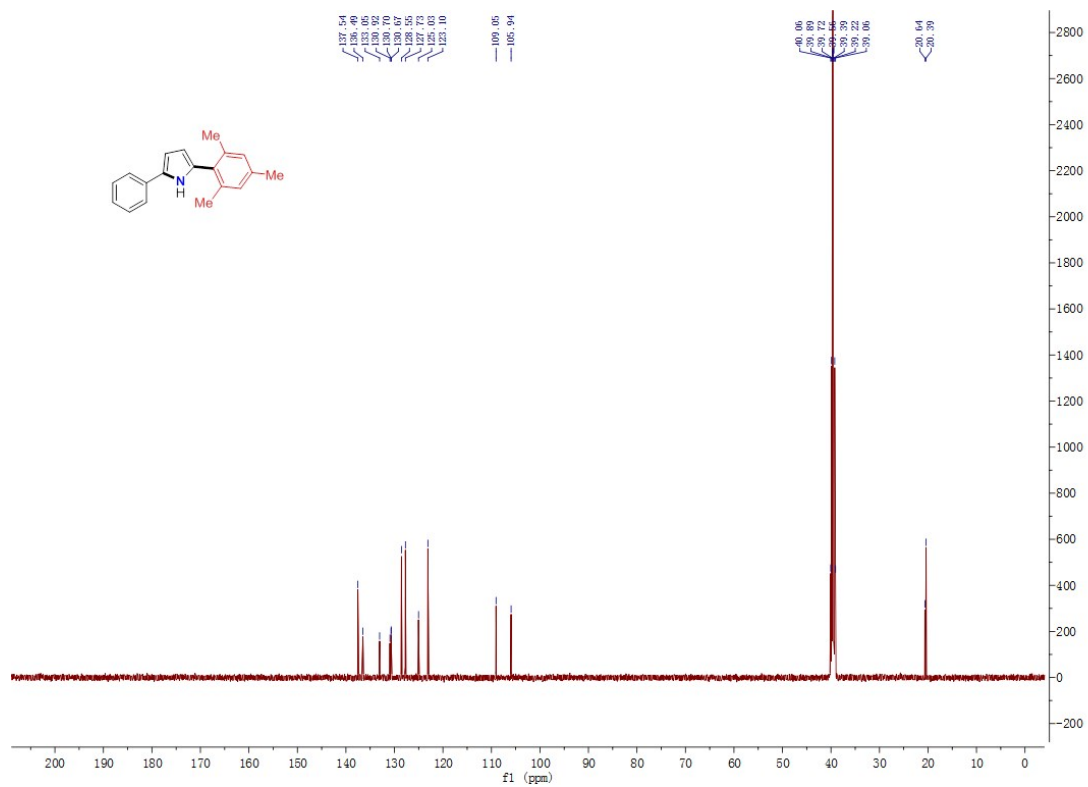

$^{13}\text{C}$  NMR (125 MHz,  $\text{DMSO-}d_6$ ) of compound 4e

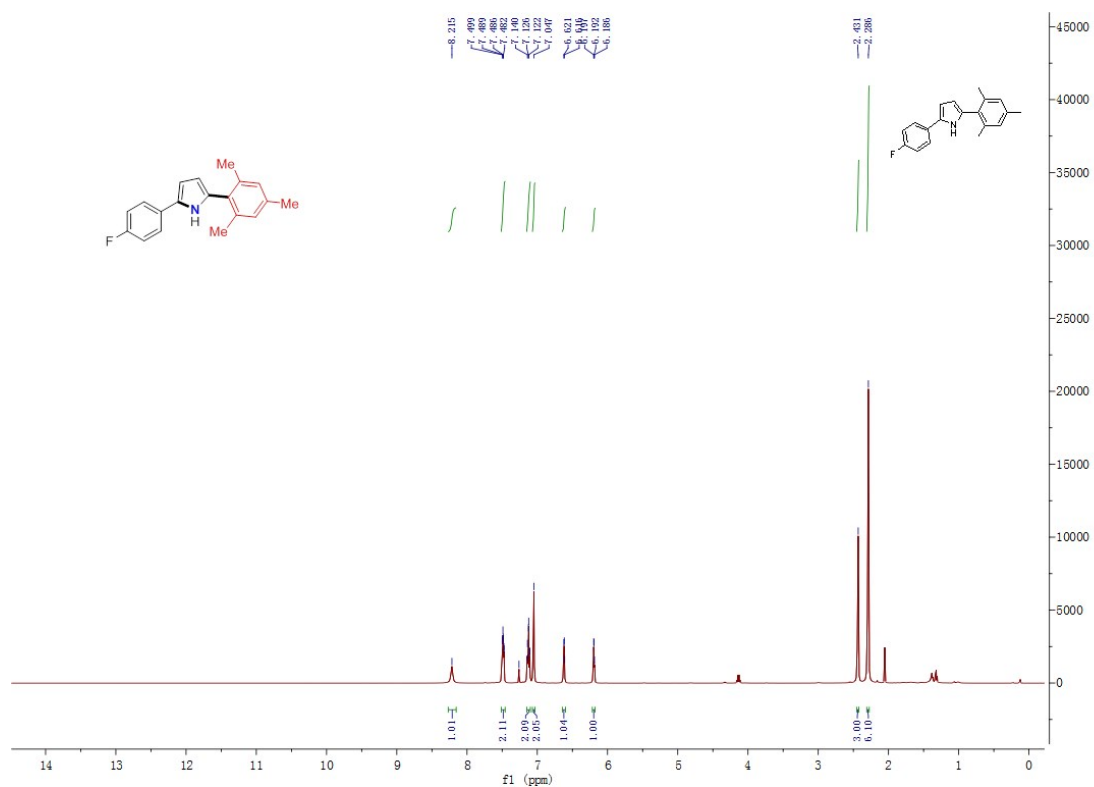

$^1\text{H}$  NMR (500 MHz,  $\text{CDCl}_3$ ) of compound 4f



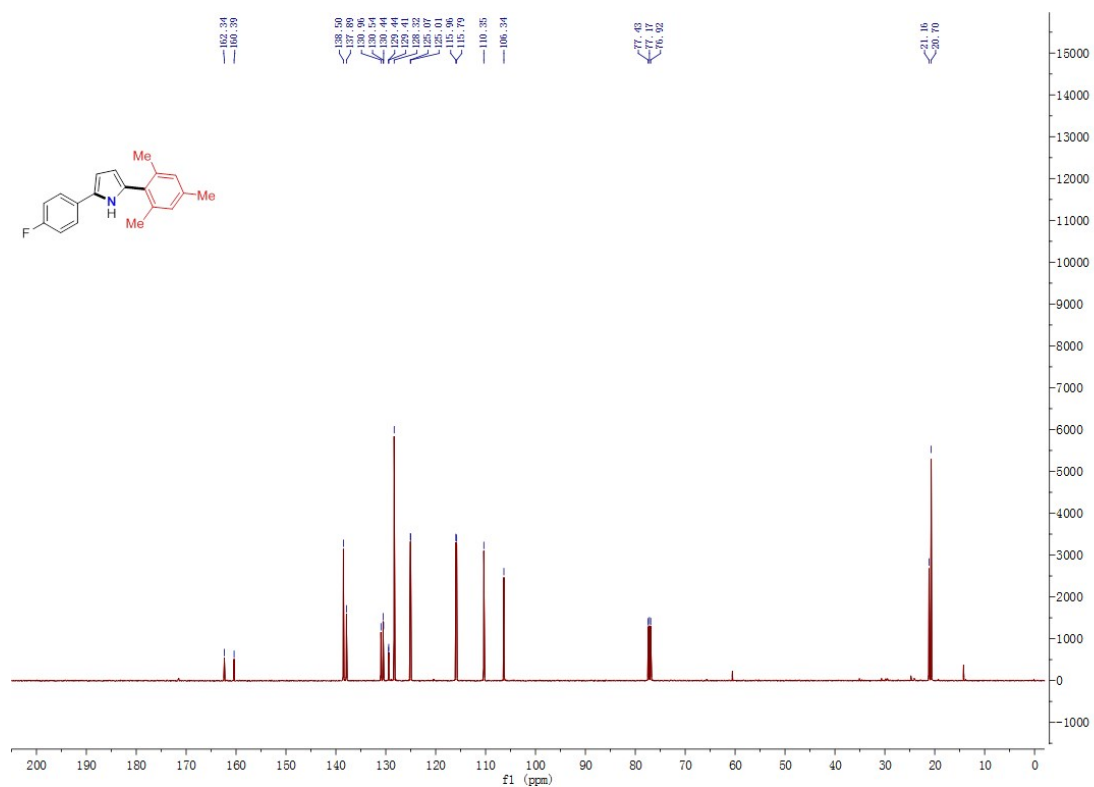

$^{13}\text{C}$  NMR (125 MHz,  $\text{CDCl}_3$ ) of compound **4f**

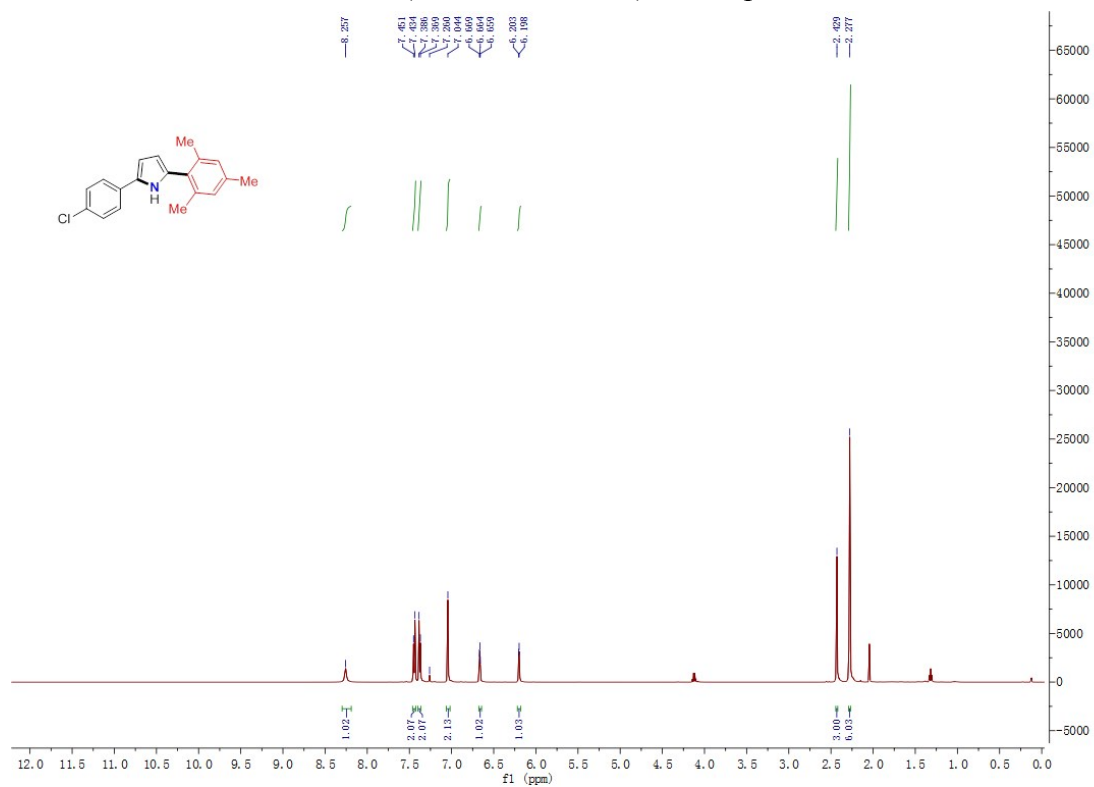

$^1\text{H}$  NMR (500 MHz,  $\text{CDCl}_3$ ) of compound **4g**

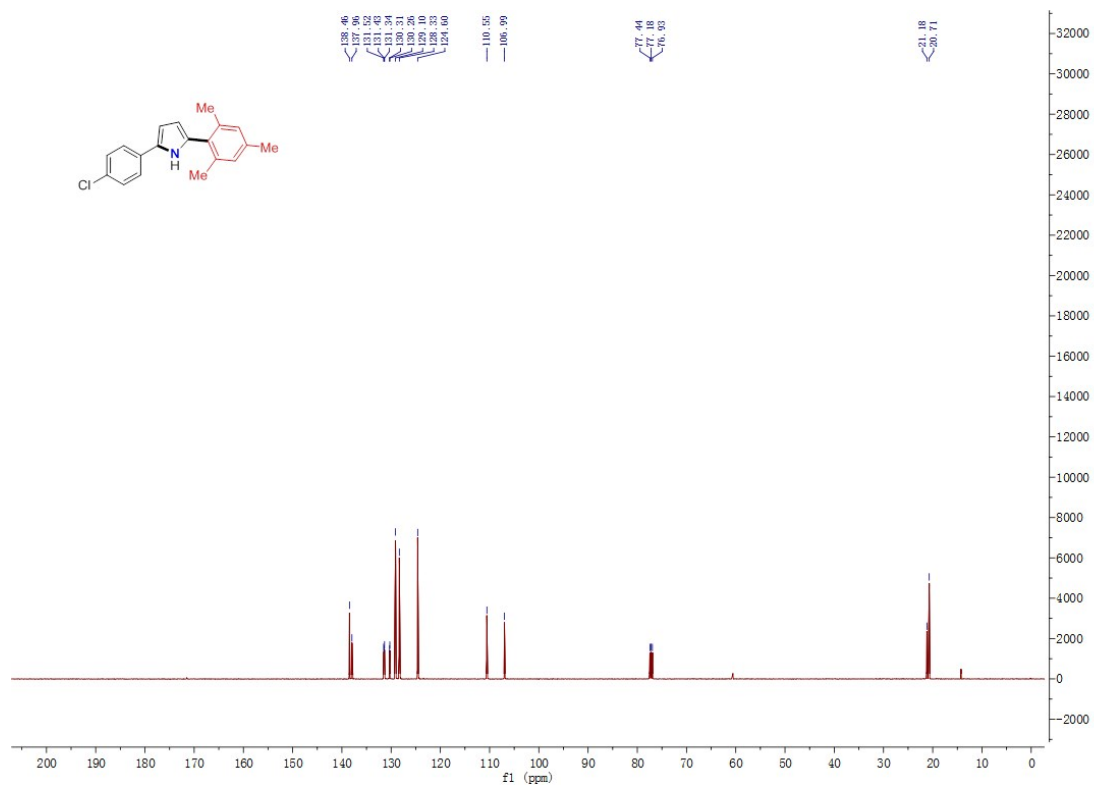

$^{13}\text{C}$  NMR (125 MHz,  $\text{CDCl}_3$ ) of compound **4g**

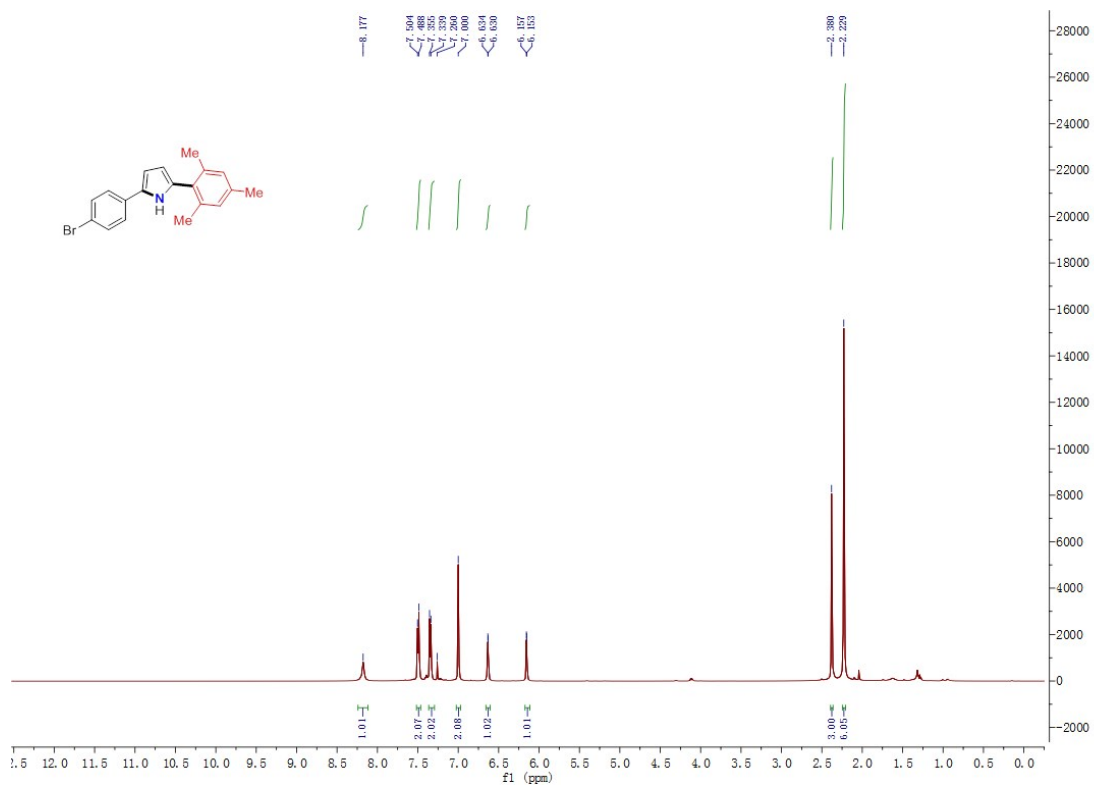

$^1\text{H}$  NMR (500 MHz,  $\text{CDCl}_3$ ) of compound **4h**

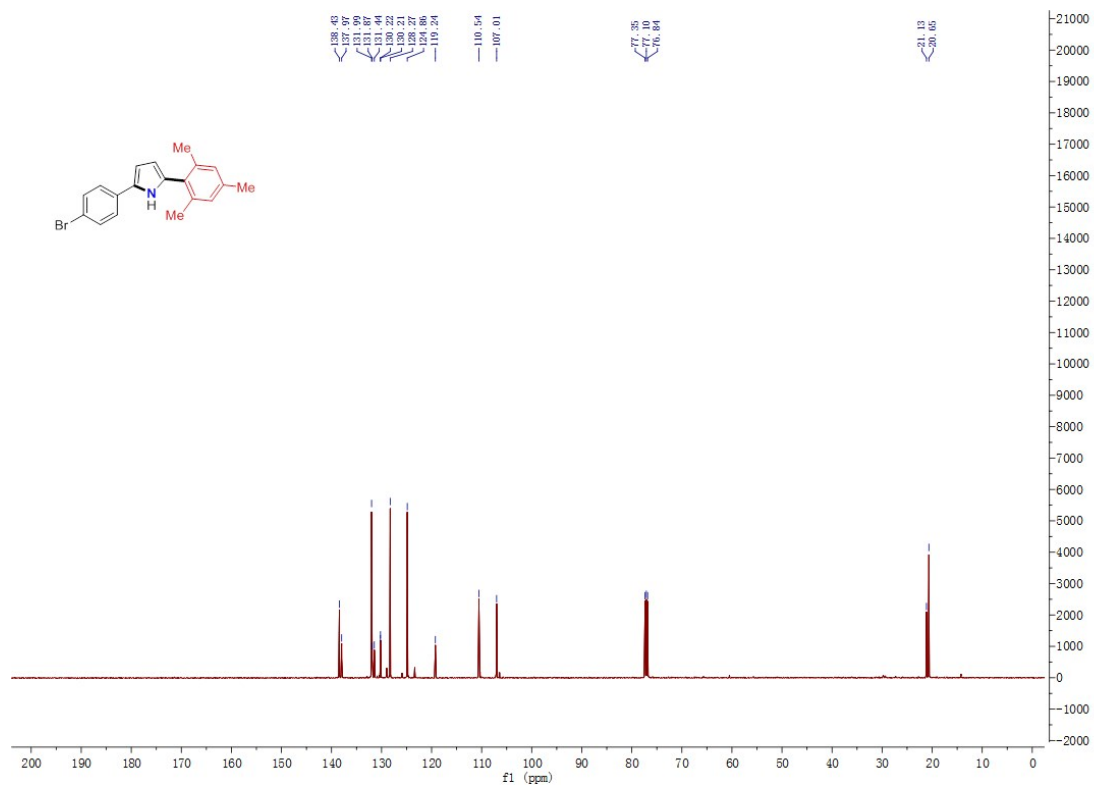

$^{13}\text{C}$  NMR (125 MHz,  $\text{CDCl}_3$ ) of compound **4h**

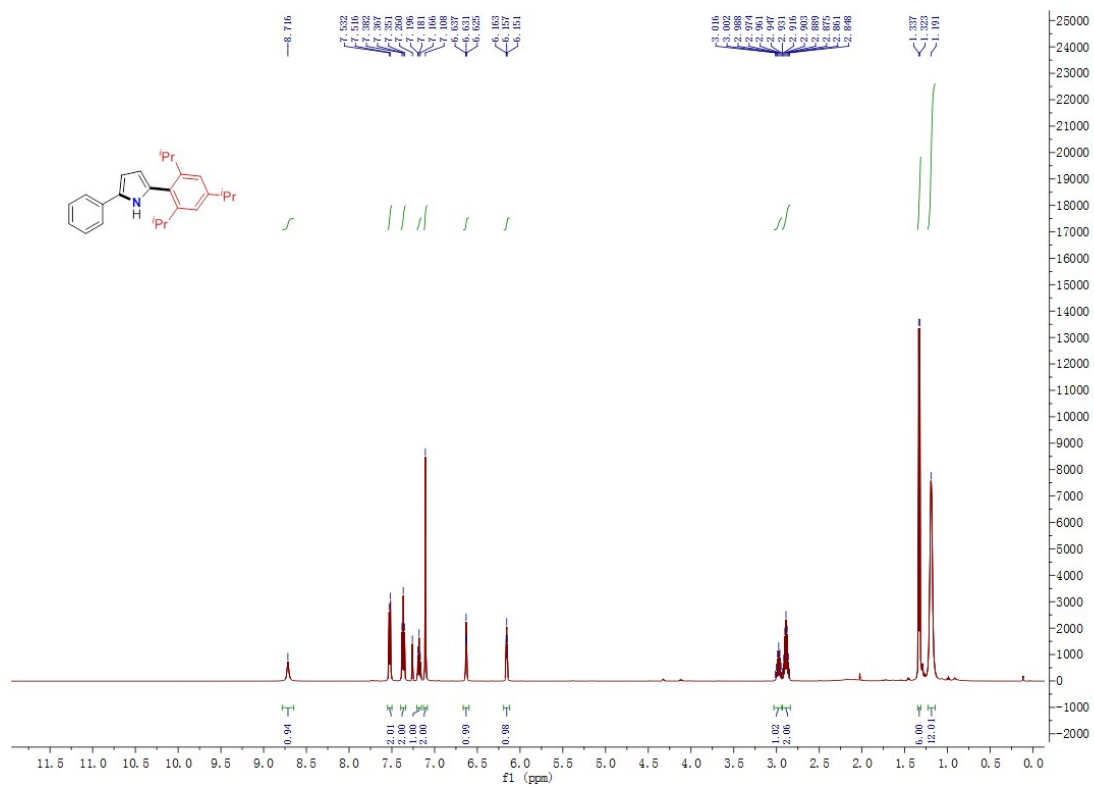

$^1\text{H}$  NMR (500 MHz,  $\text{CDCl}_3$ ) of compound **4i**

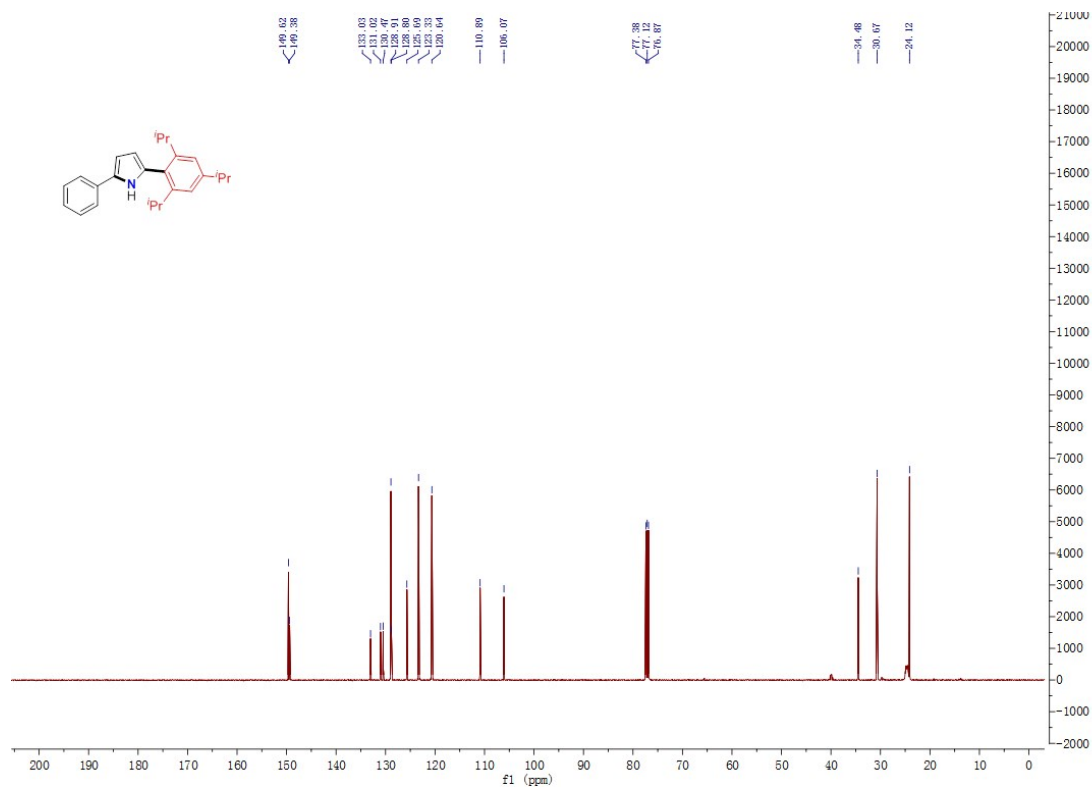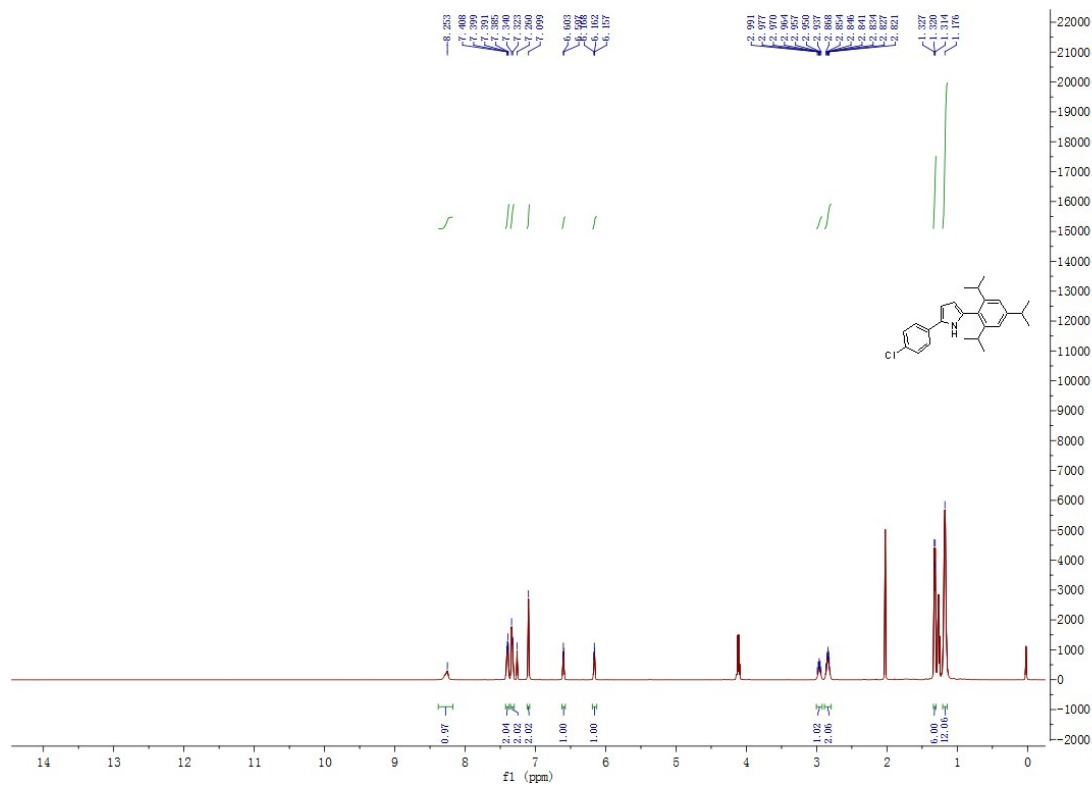

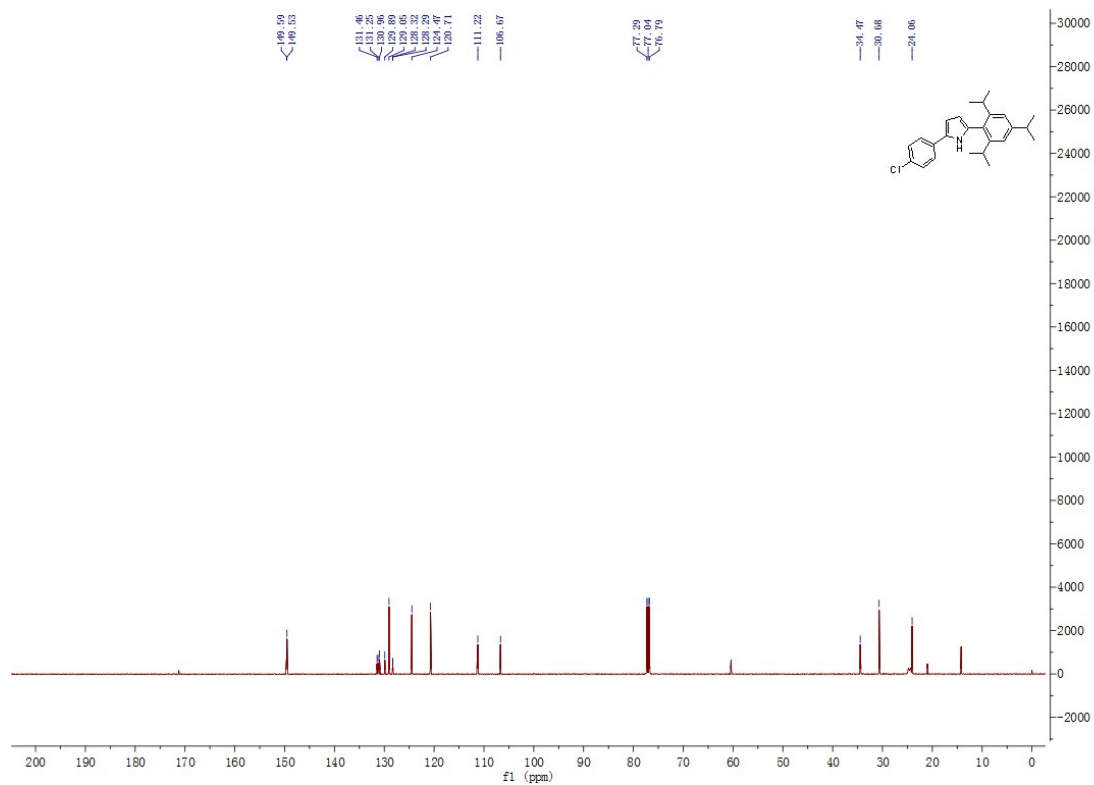

$^{13}\text{C}$  NMR (125 MHz,  $\text{CDCl}_3$ ) of compound **4j**

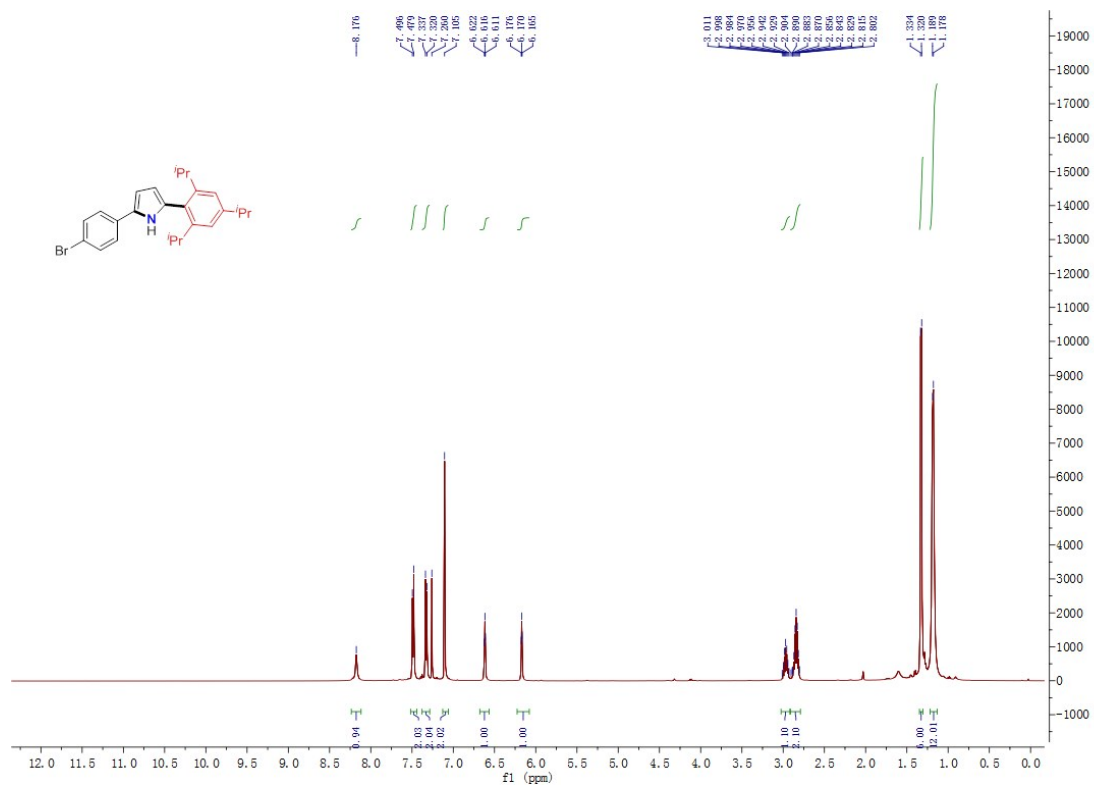

$^1\text{H}$  NMR (500 MHz,  $\text{CDCl}_3$ ) of compound **4k**
